# Supplementary material for: Genomic landscape associated with potential response to anti-CTLA-4 treatment in cancers
Source: Nat Commun. 2017 Oct 19;8:1050. doi: 10.1038/s41467-017-01018-0 (PMC5648801; doi:10.1038/s41467-017-01018-0)
Supplement: Supplementary file 4 — Supplementary Data 1 [file 41467_2017_1018_MOESM4_ESM.xlsx]

## Sheet: Table_S1
Supplementary Data 1. Genes associated with immune signature in various types of databases.
GSE356401 Affymetrix Human Genome U133 Plus 2.0 Array			GSE635572 Affymetrix Mouse Gene 1.0 ST Array			Van Allen EM et al.3 Whole transcriptome sequencing		TCGA RNA sequencing gene symbol		Expression level in responder (compared with non-responder)		Included in 'Predictive gene signature' in the original manuscript1
Id	Symbol_human		Id	Symbol_mouse		Symbol_human		Symbol_human
201660_at	ACSL3		NA	NA		ACSL3		ACSL3		down-regulated		not included
200615_s_at	AP2B1		10379654	Ap2b1		AP2B1		AP2B1		down-regulated		included
1557116_at	APOL6		10425031	Apol6		APOL6		APOL6		up-regulated		not included
218870_at	ARHGAP15		10471929	Arhgap15		ARHGAP15		ARHGAP15		up-regulated		included
226906_s_at	ARHGAP9		10366886	Arhgap9		ARHGAP9		ARHGAP9		up-regulated		not included
1555812_a_at	ARHGDIB		10548892	Arhgdib		ARHGDIB		ARHGDIB		up-regulated		not included
229094_at	ATP6V0E2-AS1		NA	NA		NA		NA		down-regulated		not included
232311_at	B2M		10475414	B2m		B2M		B2M		up-regulated		included
209770_at	BTN3A1		NA	NA		BTN3A1		BTN3A1		up-regulated		included
38241_at	BTN3A3		NA	NA		BTN3A3		BTN3A3		up-regulated		not included
1555759_a_at	CCL5		10389207	Ccl5		CCL5		CCL5		up-regulated		included
205758_at	CD8A		10538993	Cd8a		CD8A		CD8A		up-regulated		included
215332_s_at	CD8B		NA	NA		CD8B		CD8B		up-regulated		not included
219531_at	CEP72		10410576	Cep72		CEP72		CEP72		up-regulated		not included
205937_at	CGREF1		10529034	Cgref1		CGREF1		CGREF1		down-regulated		not included
204533_at	CXCL10		10531415	Cxcl10		CXCL10		CXCL10		up-regulated		included
209774_x_at	CXCL2		10523156	Cxcl2		CXCL2		CXCL2		up-regulated		included
207850_at	CXCL3		10523138	Cxcl3		CXCL3		CXCL3		up-regulated		not included
203915_at	CXCL9		10531407	Cxcl9		CXCL9		CXCL9		up-regulated		included
209606_at	CYTIP		10482802	Cytip		CYTIP		CYTIP		up-regulated		included
226309_at	DNAL1		10397179	Dnal1		DNAL1		DNAL1		down-regulated		not included
235276_at	EPSTI1		10416566	Epsti1		EPSTI1		EPSTI1		up-regulated		included
218532_s_at	FAM134B		10423333	Fam134b		FAM134B		FAM134B		down-regulated		not included
228362_s_at	FAM26F		10368644	Fam26f		FAM26F		FAM26F		up-regulated		included
209829_at	FAM65B		10404152	Fam65b		FAM65B		FAM65B		up-regulated		not included
235391_at	FAM92A1		NA	NA		FAM92A1		FAM92A1		down-regulated		not included
213008_at	FANCI		10554281	Fanci		FANCI		FANCI		down-regulated		not included
1570541_s_at	GBP1P1		NA	NA		GBP1P1		NA		up-regulated		not included
235175_at	GBP4		NA	NA		GBP4		GBP4		up-regulated		included
238581_at	GBP5		10496539	Gbp5		GBP5		GBP5		up-regulated		included
244680_at	GLRB		10498907	Glrb		GLRB		GLRB		down-regulated		not included
207651_at	GPR171		10498345	Gpr171		GPR171		GPR171		up-regulated		included
226043_at	GPSM1		10470248	Gpsm1		GPSM1		GPSM1		down-regulated		not included
206082_at	HCP5		NA	NA		HCP5		HCP5		up-regulated		included
231229_at	HILS1		10380474	Hils1		HILS1		HILS1		down-regulated		included
215313_x_at	HLA-A		NA	NA		HLA-A		HLA-A		up-regulated		included
211911_x_at	HLA-B		NA	NA		HLA-B		HLA-B		up-regulated		included
208812_x_at	HLA-C		NA	NA		HLA-C		HLA-C		up-regulated		not included
217478_s_at	HLA-DMA		NA	NA		HLA-DMA		HLA-DMA		up-regulated		included
208894_at	HLA-DRA		NA	NA		HLA-DRA		HLA-DRA		up-regulated		included
217362_x_at	HLA-DRB6		NA	NA		HLA-DRB6		HLA-DRB6		up-regulated		not included
200905_x_at	HLA-E		NA	NA		HLA-E		HLA-E		up-regulated		not included
221875_x_at	HLA-F		NA	NA		HLA-F		HLA-F		up-regulated		included
211529_x_at	HLA-G		NA	NA		HLA-G		HLA-G		up-regulated		not included
217436_x_at	HLA-J		NA	NA		HLA-J		HLA-J		up-regulated		not included
213793_s_at	HOMER1		10406626	Homer1		HOMER1		HOMER1		down-regulated		included
210439_at	ICOS		10346799	Icos		ICOS		ICOS		up-regulated		included
236301_at	IKZF3		10390640	Ikzf3		IKZF3		IKZF3		up-regulated		not included
217328_at	IL23A		10373358	Il23a		IL23A		IL23A		up-regulated		not included
204116_at	IL2RG		10606016	Il2rg		IL2RG		IL2RG		up-regulated		included
1568943_at	INPP5D		10348244	Inpp5d		INPP5D		INPP5D		up-regulated		not included
202531_at	IRF1		10376060	Irf1		IRF1		IRF1		up-regulated		included
1554240_a_at	ITGAL		10557591	Itgal		ITGAL		ITGAL		up-regulated		included
1562031_at	JAK2		10462363	Jak2		JAK2		JAK2		up-regulated		included
212813_at	JAM3		10591967	Jam3		JAM3		JAM3		down-regulated		not included
223575_at	KIAA1549		NA	NA		KIAA1549		KIAA1549		down-regulated		included
210606_x_at	KLRD1		10542214	Klrd1		KLRD1		KLRD1		up-regulated		included
204890_s_at	LCK		10516620	Lck		LCK		LCK		up-regulated		not included
208885_at	LCP1		10416437	Lcp1		LCP1		LCP1		up-regulated		included
1555852_at	LOC100507463		NA	NA		NA		NA		up-regulated		not included
1561042_at	LOC286109		NA	NA		NA		NA		down-regulated		not included
243656_at	LOC642852		NA	NA		NA		LOC642852		down-regulated		not included
225996_at	LONRF2		10354141	Lonrf2		LONRF2		LONRF2		down-regulated		included
226084_at	MAP1B		10411519	Map1b		MAP1B		MAP1B		down-regulated		included
204813_at	MAPK10		10531866	Mapk10		MAPK10		MAPK10		down-regulated		not included
243010_at	MSI2		10389680	Msi2		MSI2		MSI2		down-regulated		not included
201502_s_at	NFKBIA		10400405	Nfkbia		NFKBIA		NFKBIA		up-regulated		not included
209262_s_at	NR2F6		10579479	Nr2f6		NR2F6		NR2F6		down-regulated		not included
216945_x_at	PASK		10356780	Pask		PASK		PASK		up-regulated		not included
219891_at	PGPEP1		10579335	Pgpep1		PGPEP1		PGPEP1		down-regulated		not included
219011_at	PLEKHA4		10552982	Plekha4		PLEKHA4		PLEKHA4		down-regulated		not included
213449_at	POP1		10423629	Pop1		POP1		POP1		down-regulated		not included
214617_at	PRF1		10363475	Prf1		PRF1		PRF1		up-regulated		not included
210039_s_at	PRKCQ		10469255	Prkcq		PRKCQ		PRKCQ		up-regulated		not included
202659_at	PSMB10		10581378	Psmb10		PSMB10		PSMB10		up-regulated		included
209040_s_at	PSMB8		10444258	Psmb8		PSMB8		PSMB8		up-regulated		not included
230737_s_at	PTCHD3P1		NA	NA		NA		NA		down-regulated		not included
217494_s_at	PTENP1		NA	NA		PTENP1		PTENP1		up-regulated		not included
204897_at	PTGER4		10427461	Ptger4		PTGER4		PTGER4		up-regulated		included
204070_at	RARRES3		NA	NA		RARRES3		RARRES3		up-regulated		included
227998_at	S100A16		10493798	S100a16		S100A16		S100A16		down-regulated		not included
1552497_a_at	SLAMF6		10351691	Slamf6		SLAMF6		SLAMF6		up-regulated		included
222838_at	SLAMF7		10360173	Slamf7		SLAMF7		SLAMF7		up-regulated		included
224959_at	SLC26A2		10459183	Slc26a2		SLC26A2		SLC26A2		down-regulated		included
232176_at	SLITRK6		10422244	Slitrk6		SLITRK6		SLITRK6		down-regulated		included
223840_s_at	SPATA9		10406280	Spata9		SPATA9		SPATA9		up-regulated		not included
202523_s_at	SPOCK2		10363415	Spock2		SPOCK2		SPOCK2		up-regulated		not included
225252_at	SRXN1		10477061	Srxn1		SRXN1		SRXN1		down-regulated		not included
AFFX-HUMISGF3A/M97935_MB_at	STAT1		10346191	Stat1		STAT1		STAT1		up-regulated		included
206118_at	STAT4		10346168	Stat4		STAT4		STAT4		up-regulated		not included
204769_s_at	TAP2		10444268	Tap2		TAP2		TAP2		up-regulated		not included
220684_at	TBX21		10390328	Tbx21		TBX21		TBX21		up-regulated		not included
237515_at	TMEM56		10501802	Tmem56		TMEM56		TMEM56		down-regulated		included
202643_s_at	TNFAIP3		10368144	Tnfaip3		TNFAIP3		TNFAIP3		up-regulated		included
207536_s_at	TNFRSF9		10510580	Tnfrsf9		TNFRSF9		TNFRSF9		up-regulated		included
204529_s_at	TOX		10511416	Tox		TOX		TOX		up-regulated		included
210915_x_at	TRBC1		NA	NA		NA		NA		up-regulated		included
218145_at	TRIB3		10488608	Trib3		TRIB3		TRIB3		down-regulated		not included
201008_s_at	TXNIP		10494428	Txnip		TXNIP		TXNIP		up-regulated		not included
205890_s_at	UBD		10445112	Ubd		UBD		UBD		up-regulated		included
201649_at	UBE2L6		10473356	Ube2l6		UBE2L6		UBE2L6		up-regulated		not included
228492_at	USP9Y		10608156	Usp9y		USP9Y		USP9Y		down-regulated		included
208067_x_at	UTY		10608107	Uty		UTY		UTY		down-regulated		included
211902_x_at	YME1L1		10469732	Yme1l1		YME1L1		YME1L1		up-regulated		not included
235142_at	ZBTB8A		10516590	Zbtb8a		ZBTB8A		ZBTB8A		down-regulated		not included
Abbreviation: TCGA, The Cancer Genome Atlas; NA, not available.
1Ulloa-Montoya, F., Louahed, J., Dizier, B., Gruselle, O., Spiessens, B., Lehmann, F. F., Suciu, S., Kruit, W. H., Eggermont, A. M., Vansteenkiste, J., and Brichard, V. G. (2013). Predictive gene signature in MAGE-A3 antigen-specific cancer immunotherapy. Journal of clinical oncology : official journal of the American Society of Clinical Oncology 31, 2388-2395.
2Lesterhuis, W. J., Rinaldi, C., Jones, A., Rozali, E. N., Dick, I. M., Khong, A., Boon, L., Robinson, B. W., Nowak, A. K., Bosco, A., and Lake, R. A. (2015). Network analysis of immunotherapy-induced regressing tumours identifies novel synergistic drug combinations. Scientific reports 5, 12298.gene signature in MAGE-A3 antigen-specific cancer immunotherapy. Journal of clinical oncology : officia…
3Van Allen, E. M., Miao, D., Schilling, B., Shukla, S. A., Blank, C., Zimmer, L., Sucker, A., Hillen, U., Foppen, M. H., Goldinger, S. M., et al. (2015). Genomic correlates of response to CTLA-4 blockade in metastatic melanoma. Science 350, 207-211.
