# Supplementary material for: Genomic landscape associated with potential response to anti-CTLA-4 treatment in cancers
Source: Nat Commun. 2017 Oct 19;8:1050. doi: 10.1038/s41467-017-01018-0 (PMC5648801; doi:10.1038/s41467-017-01018-0)
Supplement: Supplementary file 5 — Supplementary Data 2 [file 41467_2017_1018_MOESM5_ESM.xlsx]

## Sheet: Sheet1
Supplementary Data 2. Predicted upstream regulators of genes in immune signature score.
Upstream Regulators	Molecule Type	Activation z-score*	P-value#
Activated in responder
IFNG	cytokine	6.006	5.61e-21
TNF	cytokine	4.916	8.1e-13
IL1B	cytokine	4.254	1.71e-15
IL27	cytokine	3.923	2.45e-20
IFNA2	cytokine	3.668	1.4e-13
IL15	cytokine	3.531	1.17e-13
IRF7	transcription regulator	3.504	9.87e-13
RELA	transcription regulator	3.503	2.12e-10
STAT1	transcription regulator	3.483	1.74e-13
TLR7	transmembrane receptor	3.418	2.31e-12
CSF2	cytokine	3.352	3.94e-12
SMARCA4	transcription regulator	3.317	6.23e-07
EBI3	cytokine	3.088	1.11e-14
IFNB1	cytokine	3.048	5.56e-09
CD40LG	cytokine	2.924	2.67e-13
NOD2	other	2.801	6.42e-10
IL1A	cytokine	2.784	8.17e-06
IL18	cytokine	2.758	2.93e-07
TLR4	transmembrane receptor	2.756	1.58e-05
IL2	cytokine	2.752	2.36e-11
Activated in non-responder
IL10RA	transmembrane receptor	3.45	2.73e-08
IRF4	transcription regulator	3.092	4.21e-12
TRIM24	transcription regulator	2.931	3.56e-11
PRDM1	transcription regulator	2.759	1e-05
INSIG1	other	2.646	5.87e-07
MAPK1	kinase	2.625	6.8e-09
ADCYAP1	other	2.599	0.000136
IL10	cytokine	2.336	1.21e-09
ESR1	nuclear receptor	2.274	3.16e-05
CSF3	cytokine	2.236	0.00111
POR	enzyme	2.213	0.00177
HMOX1	enzyme	2.2	0.000142
NR1H3	nuclear receptor	2.156	5.44e-05
MYC	transcription regulator	2.012	0.00834
RPSA	translation regulator	2	1.22e-05
IL1RN	cytokine	1.982	0.00263
KRAS	enzyme	1.982	0.0246
SOCS3	other	1.969	0.000458
SOCS1	other	1.966	2.41e-05
NKX2-3	transcription regulator	1.897	7.99e-08
* Z-score assessed the match of observed and predicted up/down regulation patterns.
# Fisher’s exact test, measuring overlap of observed and predicted regulated genes.
