# Supplementary material for: Genomic landscape associated with potential response to anti-CTLA-4 treatment in cancers
Source: Nat Commun. 2017 Oct 19;8:1050. doi: 10.1038/s41467-017-01018-0 (PMC5648801; doi:10.1038/s41467-017-01018-0)
Supplement: Supplementary file 6 — Supplementary Data 3 [file 41467_2017_1018_MOESM6_ESM.xlsx]

## Sheet: SD3
Supplementary Data 3. Immune signature scores of TCGA tumors and data availability
TCGA_ID	Cancer_type	Immune_signature_score	RNA_sequencing	Whole_exom_sequencing	Copy_number_alteration	Virus	Microsatellite_status	Tumor_purity	Overall_survival	CIN_score
TCGA-02-0047-01	GBM	0.117	TRUE	TRUE	TRUE	TRUE	FALSE	TRUE	TRUE	611.598
TCGA-02-0055-01	GBM	0.404	TRUE	TRUE	TRUE	TRUE	FALSE	TRUE	TRUE	1319.62
TCGA-02-2483-01	GBM	0.135	TRUE	TRUE	TRUE	TRUE	FALSE	TRUE	TRUE	3915.93
TCGA-02-2485-01	GBM	0.151	TRUE	TRUE	TRUE	TRUE	FALSE	TRUE	TRUE	3921.33
TCGA-02-2486-01	GBM	0.387	TRUE	TRUE	TRUE	TRUE	FALSE	TRUE	TRUE	2394.6
TCGA-04-1348-01	OV	0.677	TRUE	FALSE	TRUE	TRUE	FALSE	TRUE	TRUE	11717.9
TCGA-04-1357-01	OV	0.771	TRUE	FALSE	TRUE	TRUE	FALSE	TRUE	FALSE	4237.06
TCGA-04-1362-01	OV	0.266	TRUE	FALSE	TRUE	TRUE	FALSE	TRUE	TRUE	20985.2
TCGA-04-1364-01	OV	0.047	TRUE	TRUE	TRUE	TRUE	FALSE	TRUE	TRUE	22278.6
TCGA-04-1365-01	OV	0.528	TRUE	TRUE	TRUE	TRUE	FALSE	TRUE	TRUE	10320.4
TCGA-04-1514-01	OV	0.063	TRUE	TRUE	TRUE	TRUE	FALSE	TRUE	TRUE	7067.14
TCGA-04-1519-01	OV	0.09	TRUE	TRUE	TRUE	FALSE	FALSE	TRUE	TRUE	8789.37
TCGA-05-4244-01	LUAD	0.464	TRUE	FALSE	TRUE	TRUE	FALSE	FALSE	FALSE	4151.78
TCGA-05-4249-01	LUAD	0.438	TRUE	TRUE	TRUE	TRUE	FALSE	TRUE	TRUE	2293.28
TCGA-05-4250-01	LUAD	0.712	TRUE	FALSE	TRUE	TRUE	FALSE	TRUE	TRUE	2514.49
TCGA-05-4382-01	LUAD	0.568	TRUE	TRUE	TRUE	TRUE	FALSE	FALSE	TRUE	2082.03
TCGA-05-4384-01	LUAD	0.347	TRUE	TRUE	TRUE	TRUE	FALSE	TRUE	TRUE	535.56
TCGA-05-4389-01	LUAD	0.659	TRUE	TRUE	TRUE	TRUE	FALSE	TRUE	TRUE	3545.3
TCGA-05-4390-01	LUAD	0.314	TRUE	TRUE	TRUE	TRUE	FALSE	TRUE	TRUE	6007.81
TCGA-05-4395-01	LUAD	0.551	TRUE	TRUE	TRUE	TRUE	FALSE	TRUE	FALSE	7781.25
TCGA-05-4396-01	LUAD	0.362	TRUE	TRUE	TRUE	TRUE	FALSE	FALSE	TRUE	4807.88
TCGA-05-4397-01	LUAD	0.479	TRUE	FALSE	TRUE	TRUE	FALSE	FALSE	TRUE	6404.86
TCGA-05-4398-01	LUAD	0.695	TRUE	TRUE	TRUE	TRUE	FALSE	FALSE	TRUE	3541.05
TCGA-05-4402-01	LUAD	0.521	TRUE	TRUE	TRUE	TRUE	FALSE	FALSE	TRUE	2105.32
TCGA-05-4403-01	LUAD	0.619	TRUE	TRUE	TRUE	TRUE	FALSE	TRUE	TRUE	557.95
TCGA-05-4405-01	LUAD	0.393	TRUE	TRUE	TRUE	TRUE	FALSE	TRUE	TRUE	2819.25
TCGA-05-4410-01	LUAD	0.737	TRUE	TRUE	TRUE	TRUE	FALSE	TRUE	FALSE	1974.51
TCGA-05-4415-01	LUAD	0.285	TRUE	TRUE	TRUE	TRUE	FALSE	TRUE	TRUE	3964.15
TCGA-05-4417-01	LUAD	0.632	TRUE	TRUE	TRUE	TRUE	FALSE	TRUE	TRUE	2003.94
TCGA-05-4418-01	LUAD	0.644	TRUE	TRUE	TRUE	TRUE	FALSE	FALSE	TRUE	1015.97
TCGA-05-4420-01	LUAD	0.213	TRUE	TRUE	TRUE	TRUE	FALSE	TRUE	TRUE	4838.03
TCGA-05-4422-01	LUAD	0.722	TRUE	TRUE	TRUE	TRUE	FALSE	TRUE	TRUE	5611.14
TCGA-05-4424-01	LUAD	0.447	TRUE	TRUE	TRUE	TRUE	FALSE	TRUE	TRUE	1517.07
TCGA-05-4425-01	LUAD	0.675	TRUE	TRUE	TRUE	TRUE	FALSE	TRUE	TRUE	2253.55
TCGA-05-4426-01	LUAD	0.421	TRUE	TRUE	TRUE	TRUE	FALSE	TRUE	TRUE	2759.52
TCGA-05-4427-01	LUAD	0.524	TRUE	FALSE	TRUE	TRUE	FALSE	TRUE	TRUE	3534.05
TCGA-05-4430-01	LUAD	0.566	TRUE	TRUE	TRUE	TRUE	FALSE	TRUE	TRUE	1437.28
TCGA-05-4432-01	LUAD	0.521	TRUE	TRUE	TRUE	TRUE	FALSE	TRUE	TRUE	5095.23
TCGA-05-4433-01	LUAD	0.652	TRUE	TRUE	TRUE	TRUE	FALSE	TRUE	TRUE	2068.33
TCGA-05-4434-01	LUAD	0.754	TRUE	FALSE	TRUE	TRUE	FALSE	TRUE	TRUE	1159.01
TCGA-05-5420-01	LUAD	0.843	TRUE	TRUE	TRUE	TRUE	FALSE	TRUE	TRUE	584.277
TCGA-05-5423-01	LUAD	0.634	TRUE	TRUE	TRUE	TRUE	FALSE	TRUE	TRUE	5951.86
TCGA-05-5425-01	LUAD	0.771	TRUE	FALSE	TRUE	TRUE	FALSE	TRUE	TRUE	2841.89
TCGA-05-5428-01	LUAD	0.401	TRUE	TRUE	TRUE	TRUE	FALSE	TRUE	TRUE	7310.73
TCGA-05-5429-01	LUAD	0.417	TRUE	TRUE	TRUE	TRUE	FALSE	TRUE	TRUE	1860.55
TCGA-05-5715-01	LUAD	0.389	TRUE	TRUE	TRUE	TRUE	FALSE	TRUE	TRUE	4743.92
TCGA-06-0125-01	GBM	0.063	TRUE	TRUE	TRUE	TRUE	FALSE	TRUE	TRUE	3086.17
TCGA-06-0125-02	GBM	0.136	TRUE	FALSE	FALSE	FALSE	FALSE	TRUE	TRUE	NA
TCGA-06-0129-01	GBM	0.183	TRUE	TRUE	TRUE	TRUE	FALSE	TRUE	TRUE	3381.12
TCGA-06-0130-01	GBM	0.542	TRUE	TRUE	TRUE	TRUE	FALSE	TRUE	TRUE	1078.06
TCGA-06-0132-01	GBM	0.284	TRUE	TRUE	TRUE	TRUE	FALSE	TRUE	TRUE	319.791
TCGA-06-0138-01	GBM	0.177	TRUE	FALSE	TRUE	FALSE	FALSE	TRUE	TRUE	3452.74
TCGA-06-0141-01	GBM	0.281	TRUE	TRUE	TRUE	TRUE	FALSE	TRUE	TRUE	167.82
TCGA-06-0152-02	GBM	0.384	TRUE	FALSE	FALSE	FALSE	FALSE	TRUE	TRUE	NA
TCGA-06-0156-01	GBM	0.214	TRUE	FALSE	FALSE	FALSE	FALSE	TRUE	TRUE	NA
TCGA-06-0157-01	GBM	0.161	TRUE	TRUE	TRUE	TRUE	FALSE	FALSE	TRUE	3589.22
TCGA-06-0158-01	GBM	0.136	TRUE	TRUE	TRUE	TRUE	FALSE	TRUE	TRUE	3811.52
TCGA-06-0168-01	GBM	0.282	TRUE	TRUE	TRUE	TRUE	FALSE	TRUE	TRUE	3420.71
TCGA-06-0171-02	GBM	0.498	TRUE	FALSE	FALSE	FALSE	FALSE	TRUE	TRUE	NA
TCGA-06-0174-01	GBM	0.058	TRUE	TRUE	TRUE	TRUE	FALSE	TRUE	TRUE	5064
TCGA-06-0178-01	GBM	0.171	TRUE	TRUE	TRUE	TRUE	FALSE	TRUE	TRUE	32.8032
TCGA-06-0184-01	GBM	0.217	TRUE	TRUE	TRUE	TRUE	FALSE	TRUE	TRUE	3592.69
TCGA-06-0187-01	GBM	0.176	TRUE	TRUE	TRUE	FALSE	FALSE	TRUE	TRUE	4973.77
TCGA-06-0190-01	GBM	0.227	TRUE	TRUE	TRUE	TRUE	FALSE	TRUE	TRUE	1527.35
TCGA-06-0190-02	GBM	0.288	TRUE	FALSE	FALSE	FALSE	FALSE	TRUE	TRUE	NA
TCGA-06-0210-01	GBM	0.163	TRUE	TRUE	TRUE	TRUE	FALSE	TRUE	TRUE	1321.11
TCGA-06-0210-02	GBM	0.263	TRUE	FALSE	FALSE	FALSE	FALSE	FALSE	TRUE	NA
TCGA-06-0211-01	GBM	0.126	TRUE	TRUE	TRUE	TRUE	FALSE	TRUE	TRUE	4497.08
TCGA-06-0211-02	GBM	0.241	TRUE	FALSE	FALSE	FALSE	FALSE	TRUE	TRUE	NA
TCGA-06-0219-01	GBM	0.171	TRUE	TRUE	TRUE	TRUE	FALSE	TRUE	TRUE	1993.77
TCGA-06-0221-02	GBM	0.049	TRUE	FALSE	FALSE	FALSE	FALSE	TRUE	TRUE	NA
TCGA-06-0238-01	GBM	0.214	TRUE	TRUE	TRUE	TRUE	FALSE	TRUE	TRUE	2223.32
TCGA-06-0644-01	GBM	0.196	TRUE	TRUE	TRUE	TRUE	FALSE	TRUE	TRUE	2666.48
TCGA-06-0645-01	GBM	0.338	TRUE	TRUE	TRUE	TRUE	FALSE	TRUE	TRUE	2156.71
TCGA-06-0646-01	GBM	0.149	TRUE	TRUE	TRUE	TRUE	FALSE	FALSE	TRUE	2798.38
TCGA-06-0649-01	GBM	0.249	TRUE	TRUE	TRUE	TRUE	FALSE	TRUE	TRUE	2200.47
TCGA-06-0686-01	GBM	0.087	TRUE	TRUE	TRUE	TRUE	FALSE	TRUE	TRUE	3690.91
TCGA-06-0743-01	GBM	0.167	TRUE	TRUE	TRUE	TRUE	FALSE	TRUE	TRUE	3053.09
TCGA-06-0744-01	GBM	0.085	TRUE	TRUE	TRUE	TRUE	FALSE	TRUE	TRUE	4708.13
TCGA-06-0745-01	GBM	0.152	TRUE	TRUE	TRUE	TRUE	FALSE	TRUE	TRUE	3818.47
TCGA-06-0747-01	GBM	0.072	TRUE	TRUE	TRUE	TRUE	FALSE	TRUE	TRUE	3146.76
TCGA-06-0749-01	GBM	0.139	TRUE	TRUE	TRUE	TRUE	FALSE	TRUE	TRUE	1154.6
TCGA-06-0750-01	GBM	0.222	TRUE	TRUE	TRUE	TRUE	FALSE	TRUE	TRUE	2835.8
TCGA-06-0878-01	GBM	0.191	TRUE	TRUE	TRUE	TRUE	FALSE	TRUE	TRUE	2771.45
TCGA-06-0882-01	GBM	0.172	TRUE	TRUE	TRUE	TRUE	FALSE	TRUE	TRUE	1250.48
TCGA-06-1804-01	GBM	0.139	TRUE	TRUE	TRUE	TRUE	FALSE	TRUE	TRUE	2853.71
TCGA-06-2557-01	GBM	0.31	TRUE	TRUE	TRUE	TRUE	FALSE	TRUE	TRUE	3578.77
TCGA-06-2558-01	GBM	0.136	TRUE	TRUE	TRUE	TRUE	FALSE	TRUE	TRUE	3420.78
TCGA-06-2559-01	GBM	0.098	TRUE	TRUE	TRUE	TRUE	FALSE	TRUE	TRUE	2886.48
TCGA-06-2561-01	GBM	0.188	TRUE	TRUE	TRUE	TRUE	FALSE	FALSE	TRUE	3243.93
TCGA-06-2562-01	GBM	0.097	TRUE	TRUE	TRUE	TRUE	FALSE	TRUE	TRUE	3210.39
TCGA-06-2563-01	GBM	0.205	TRUE	TRUE	TRUE	TRUE	FALSE	TRUE	TRUE	3238.86
TCGA-06-2564-01	GBM	0.109	TRUE	TRUE	TRUE	TRUE	FALSE	TRUE	TRUE	3126.73
TCGA-06-2565-01	GBM	0.104	TRUE	TRUE	TRUE	TRUE	FALSE	TRUE	TRUE	2969.43
TCGA-06-2567-01	GBM	0.27	TRUE	TRUE	TRUE	TRUE	FALSE	TRUE	TRUE	2132.15
TCGA-06-2569-01	GBM	0.033	TRUE	TRUE	TRUE	TRUE	FALSE	TRUE	TRUE	8307.82
TCGA-06-2570-01	GBM	0.153	TRUE	TRUE	TRUE	TRUE	FALSE	TRUE	TRUE	1778.94
TCGA-06-5408-01	GBM	0.161	TRUE	TRUE	TRUE	TRUE	FALSE	TRUE	TRUE	3121.77
TCGA-06-5410-01	GBM	0.442	TRUE	TRUE	TRUE	TRUE	FALSE	TRUE	TRUE	118.17
TCGA-06-5411-01	GBM	0.112	TRUE	TRUE	TRUE	TRUE	FALSE	TRUE	TRUE	2098.92
TCGA-06-5412-01	GBM	0.329	TRUE	TRUE	TRUE	TRUE	FALSE	TRUE	TRUE	280.777
TCGA-06-5413-01	GBM	0.215	TRUE	TRUE	TRUE	TRUE	FALSE	TRUE	TRUE	2142.05
TCGA-06-5414-01	GBM	0.168	TRUE	TRUE	TRUE	TRUE	FALSE	TRUE	TRUE	1925.9
TCGA-06-5415-01	GBM	0.115	TRUE	TRUE	TRUE	TRUE	FALSE	TRUE	TRUE	3306.47
TCGA-06-5416-01	GBM	0.096	TRUE	TRUE	TRUE	FALSE	FALSE	TRUE	TRUE	1786.67
TCGA-06-5417-01	GBM	0.044	TRUE	TRUE	FALSE	TRUE	FALSE	TRUE	TRUE	NA
TCGA-06-5418-01	GBM	0.125	TRUE	TRUE	TRUE	TRUE	FALSE	FALSE	TRUE	4055.95
TCGA-06-5856-01	GBM	0.105	TRUE	TRUE	TRUE	TRUE	FALSE	TRUE	TRUE	5552.84
TCGA-06-5858-01	GBM	0.141	TRUE	TRUE	TRUE	TRUE	FALSE	TRUE	TRUE	2365.54
TCGA-06-5859-01	GBM	0.23	TRUE	TRUE	TRUE	TRUE	FALSE	TRUE	TRUE	5387.82
TCGA-08-0386-01	GBM	0.062	TRUE	TRUE	TRUE	TRUE	FALSE	TRUE	TRUE	4698.12
TCGA-09-0364-01	OV	0.025	TRUE	TRUE	TRUE	FALSE	FALSE	TRUE	TRUE	7283.64
TCGA-09-0366-01	OV	0.47	TRUE	FALSE	TRUE	TRUE	FALSE	TRUE	TRUE	6235.12
TCGA-09-0367-01	OV	0.402	TRUE	FALSE	TRUE	FALSE	FALSE	TRUE	TRUE	9698.86
TCGA-09-0369-01	OV	0.073	TRUE	FALSE	TRUE	TRUE	FALSE	TRUE	TRUE	10066.6
TCGA-09-1662-01	OV	0.451	TRUE	TRUE	TRUE	TRUE	FALSE	TRUE	TRUE	6075.68
TCGA-09-1666-01	OV	0.481	TRUE	TRUE	TRUE	TRUE	FALSE	TRUE	TRUE	7338.48
TCGA-09-1667-01	OV	0.599	TRUE	FALSE	TRUE	FALSE	FALSE	TRUE	TRUE	10003.1
TCGA-09-1668-01	OV	0.619	TRUE	FALSE	TRUE	FALSE	FALSE	TRUE	TRUE	6900.5
TCGA-09-1669-01	OV	0.412	TRUE	TRUE	TRUE	TRUE	FALSE	TRUE	TRUE	9123.46
TCGA-09-1670-01	OV	0.303	TRUE	FALSE	TRUE	FALSE	FALSE	TRUE	TRUE	6933.06
TCGA-09-1673-01	OV	0.215	TRUE	FALSE	TRUE	FALSE	FALSE	TRUE	TRUE	14277.7
TCGA-09-1674-01	OV	0.06	TRUE	FALSE	TRUE	FALSE	FALSE	TRUE	TRUE	16172.1
TCGA-09-2044-01	OV	0.34	TRUE	FALSE	TRUE	TRUE	FALSE	TRUE	TRUE	10649.5
TCGA-09-2045-01	OV	0.302	TRUE	FALSE	TRUE	TRUE	FALSE	TRUE	TRUE	7894.55
TCGA-09-2048-01	OV	0.081	TRUE	FALSE	TRUE	FALSE	FALSE	TRUE	TRUE	11516.7
TCGA-09-2051-01	OV	0.494	TRUE	FALSE	TRUE	TRUE	FALSE	TRUE	TRUE	8060.47
TCGA-09-2054-01	OV	0.129	TRUE	FALSE	TRUE	FALSE	FALSE	TRUE	TRUE	11953
TCGA-09-2056-01	OV	0.354	TRUE	FALSE	TRUE	TRUE	FALSE	TRUE	TRUE	9129.69
TCGA-10-0928-01	OV	0.176	TRUE	TRUE	TRUE	TRUE	FALSE	TRUE	TRUE	11823.7
TCGA-10-0936-01	OV	0.344	TRUE	FALSE	TRUE	FALSE	FALSE	TRUE	TRUE	18086.8
TCGA-12-0616-01	GBM	0.196	TRUE	TRUE	TRUE	TRUE	FALSE	TRUE	TRUE	2370.01
TCGA-12-0618-01	GBM	0.056	TRUE	TRUE	TRUE	TRUE	FALSE	TRUE	TRUE	4498.13
TCGA-12-0619-01	GBM	0.215	TRUE	TRUE	TRUE	TRUE	FALSE	TRUE	TRUE	4354.42
TCGA-12-0821-01	GBM	0.083	TRUE	TRUE	TRUE	TRUE	FALSE	TRUE	TRUE	4026.88
TCGA-12-1597-01	GBM	0.093	TRUE	TRUE	FALSE	TRUE	FALSE	TRUE	TRUE	NA
TCGA-12-3650-01	GBM	0.09	TRUE	TRUE	TRUE	TRUE	FALSE	TRUE	TRUE	4400
TCGA-12-3652-01	GBM	0.115	TRUE	TRUE	TRUE	TRUE	FALSE	TRUE	TRUE	4858.77
TCGA-12-3653-01	GBM	0.337	TRUE	TRUE	TRUE	TRUE	FALSE	TRUE	TRUE	11934.1
TCGA-12-5295-01	GBM	0.195	TRUE	TRUE	TRUE	TRUE	FALSE	TRUE	TRUE	3048.04
TCGA-12-5299-01	GBM	0.166	TRUE	TRUE	TRUE	TRUE	FALSE	TRUE	TRUE	4190.89
TCGA-13-0730-01	OV	0.225	TRUE	TRUE	TRUE	TRUE	FALSE	TRUE	TRUE	12515
TCGA-13-0799-01	OV	0.324	TRUE	FALSE	TRUE	FALSE	FALSE	TRUE	TRUE	7300.45
TCGA-13-0800-01	OV	0.054	TRUE	FALSE	TRUE	TRUE	FALSE	TRUE	TRUE	14480.5
TCGA-13-0801-01	OV	0.553	TRUE	TRUE	TRUE	FALSE	FALSE	TRUE	TRUE	8350.56
TCGA-13-0890-01	OV	0.357	TRUE	FALSE	TRUE	TRUE	FALSE	TRUE	TRUE	4581.83
TCGA-13-0893-01	OV	0.458	TRUE	FALSE	TRUE	TRUE	FALSE	TRUE	TRUE	19832.3
TCGA-13-0897-01	OV	0.402	TRUE	FALSE	TRUE	TRUE	FALSE	TRUE	TRUE	11043
TCGA-13-0899-01	OV	0.257	TRUE	FALSE	TRUE	TRUE	FALSE	TRUE	TRUE	9056.15
TCGA-13-0913-01	OV	0.122	TRUE	FALSE	TRUE	TRUE	FALSE	TRUE	TRUE	13140.8
TCGA-13-0916-01	OV	0.55	TRUE	FALSE	TRUE	TRUE	FALSE	TRUE	TRUE	9471.04
TCGA-13-0920-01	OV	0.287	TRUE	FALSE	TRUE	TRUE	FALSE	TRUE	TRUE	9512.33
TCGA-13-0924-01	OV	0.536	TRUE	FALSE	TRUE	TRUE	FALSE	TRUE	TRUE	3925.33
TCGA-13-1403-01	OV	0.259	TRUE	FALSE	TRUE	TRUE	FALSE	TRUE	TRUE	17999.5
TCGA-13-1405-01	OV	0.36	TRUE	FALSE	TRUE	TRUE	FALSE	TRUE	TRUE	7293.98
TCGA-13-1410-01	OV	0.442	TRUE	FALSE	TRUE	TRUE	FALSE	TRUE	TRUE	35295.6
TCGA-13-1481-01	OV	0.276	TRUE	FALSE	TRUE	TRUE	FALSE	TRUE	TRUE	3641.54
TCGA-13-1489-02	OV	0.418	TRUE	FALSE	FALSE	FALSE	FALSE	TRUE	TRUE	NA
TCGA-13-1497-01	OV	0.36	TRUE	FALSE	TRUE	TRUE	FALSE	TRUE	TRUE	11042
TCGA-13-1498-01	OV	0.691	TRUE	FALSE	TRUE	TRUE	FALSE	TRUE	TRUE	8830.25
TCGA-13-1505-01	OV	0.276	TRUE	FALSE	TRUE	TRUE	FALSE	TRUE	TRUE	8340.86
TCGA-13-1506-01	OV	0.305	TRUE	FALSE	TRUE	TRUE	FALSE	TRUE	TRUE	11116.8
TCGA-13-1507-01	OV	0.634	TRUE	FALSE	TRUE	TRUE	FALSE	TRUE	TRUE	3776.9
TCGA-13-1511-01	OV	0.263	TRUE	FALSE	TRUE	FALSE	FALSE	TRUE	TRUE	8788.13
TCGA-13-1512-01	OV	0.298	TRUE	FALSE	TRUE	TRUE	FALSE	TRUE	TRUE	8954.3
TCGA-13-2060-01	OV	0.561	TRUE	FALSE	TRUE	TRUE	FALSE	TRUE	TRUE	11286.5
TCGA-14-0736-02	GBM	0.323	TRUE	FALSE	FALSE	FALSE	FALSE	TRUE	TRUE	NA
TCGA-14-0781-01	GBM	0.172	TRUE	TRUE	TRUE	TRUE	FALSE	TRUE	TRUE	138.115
TCGA-14-0787-01	GBM	0.112	TRUE	TRUE	TRUE	TRUE	FALSE	TRUE	TRUE	3531.85
TCGA-14-0789-01	GBM	0.246	TRUE	TRUE	TRUE	TRUE	FALSE	TRUE	TRUE	1207.52
TCGA-14-0790-01	GBM	0.159	TRUE	TRUE	TRUE	TRUE	FALSE	TRUE	TRUE	3602.24
TCGA-14-0817-01	GBM	0.338	TRUE	TRUE	TRUE	TRUE	FALSE	TRUE	TRUE	4048.16
TCGA-14-0871-01	GBM	0.057	TRUE	TRUE	TRUE	FALSE	FALSE	TRUE	TRUE	11244.9
TCGA-14-1034-01	GBM	0.224	TRUE	TRUE	TRUE	TRUE	FALSE	TRUE	TRUE	3181.54
TCGA-14-1034-02	GBM	0.073	TRUE	FALSE	FALSE	FALSE	FALSE	TRUE	TRUE	NA
TCGA-14-1402-02	GBM	0.288	TRUE	FALSE	FALSE	FALSE	FALSE	TRUE	TRUE	NA
TCGA-14-1823-01	GBM	0.293	TRUE	TRUE	TRUE	TRUE	FALSE	TRUE	TRUE	7134.31
TCGA-14-1825-01	GBM	0.05	TRUE	TRUE	TRUE	TRUE	FALSE	TRUE	TRUE	5617.83
TCGA-14-1829-01	GBM	0.226	TRUE	TRUE	TRUE	TRUE	FALSE	TRUE	TRUE	2845.09
TCGA-14-2554-01	GBM	0.214	TRUE	TRUE	TRUE	TRUE	FALSE	TRUE	TRUE	4644.34
TCGA-15-0742-01	GBM	0.06	TRUE	TRUE	TRUE	TRUE	FALSE	TRUE	TRUE	4654.85
TCGA-15-1444-01	GBM	0.111	TRUE	TRUE	TRUE	TRUE	FALSE	TRUE	TRUE	820.185
TCGA-16-0846-01	GBM	0.351	TRUE	TRUE	TRUE	TRUE	FALSE	TRUE	TRUE	2283.33
TCGA-16-1045-01	GBM	0.312	TRUE	TRUE	TRUE	TRUE	FALSE	TRUE	TRUE	2370.01
TCGA-18-3406-01	LUSC	0.716	TRUE	TRUE	TRUE	TRUE	FALSE	TRUE	TRUE	2798.28
TCGA-18-3407-01	LUSC	0.374	TRUE	TRUE	TRUE	TRUE	FALSE	TRUE	TRUE	2005.9
TCGA-18-3408-01	LUSC	0.394	TRUE	TRUE	TRUE	TRUE	FALSE	TRUE	TRUE	5117.3
TCGA-18-3409-01	LUSC	0.329	TRUE	TRUE	TRUE	TRUE	FALSE	TRUE	TRUE	1519.38
TCGA-18-3410-01	LUSC	0.745	TRUE	TRUE	TRUE	TRUE	FALSE	TRUE	TRUE	7181.43
TCGA-18-3411-01	LUSC	0.361	TRUE	TRUE	TRUE	TRUE	FALSE	TRUE	TRUE	7168.38
TCGA-18-3412-01	LUSC	0.357	TRUE	TRUE	TRUE	TRUE	FALSE	TRUE	TRUE	13400.1
TCGA-18-3414-01	LUSC	0.399	TRUE	TRUE	TRUE	TRUE	FALSE	TRUE	TRUE	7703.96
TCGA-18-3415-01	LUSC	0.529	TRUE	TRUE	TRUE	TRUE	FALSE	TRUE	TRUE	3498.79
TCGA-18-3416-01	LUSC	0.756	TRUE	TRUE	TRUE	TRUE	FALSE	TRUE	TRUE	5999.93
TCGA-18-3417-01	LUSC	0.422	TRUE	TRUE	TRUE	TRUE	FALSE	TRUE	TRUE	5990.1
TCGA-18-3419-01	LUSC	0.485	TRUE	TRUE	TRUE	TRUE	FALSE	TRUE	TRUE	3916.03
TCGA-18-3421-01	LUSC	0.492	TRUE	TRUE	TRUE	TRUE	FALSE	TRUE	TRUE	4329.51
TCGA-18-4083-01	LUSC	0.395	TRUE	TRUE	TRUE	TRUE	FALSE	TRUE	TRUE	5246.52
TCGA-18-4086-01	LUSC	0.411	TRUE	TRUE	TRUE	TRUE	FALSE	TRUE	TRUE	2267.12
TCGA-18-4721-01	LUSC	0.527	TRUE	TRUE	TRUE	TRUE	FALSE	TRUE	TRUE	2057.25
TCGA-18-5592-01	LUSC	0.294	TRUE	TRUE	TRUE	TRUE	FALSE	TRUE	TRUE	7547.13
TCGA-18-5595-01	LUSC	0.17	TRUE	TRUE	TRUE	TRUE	FALSE	TRUE	TRUE	5099.97
TCGA-19-0957-02	GBM	0.15	TRUE	FALSE	FALSE	FALSE	FALSE	TRUE	TRUE	NA
TCGA-19-1389-02	GBM	0.214	TRUE	FALSE	FALSE	FALSE	FALSE	TRUE	TRUE	NA
TCGA-19-1390-01	GBM	0.065	TRUE	TRUE	TRUE	TRUE	FALSE	TRUE	TRUE	5886.29
TCGA-19-1787-01	GBM	0.193	TRUE	TRUE	TRUE	FALSE	FALSE	TRUE	TRUE	7716.33
TCGA-19-2619-01	GBM	0.093	TRUE	TRUE	TRUE	TRUE	FALSE	TRUE	TRUE	6913.75
TCGA-19-2620-01	GBM	0.094	TRUE	TRUE	TRUE	TRUE	FALSE	TRUE	TRUE	2837.37
TCGA-19-2624-01	GBM	0.053	TRUE	TRUE	TRUE	TRUE	FALSE	FALSE	TRUE	3500.63
TCGA-19-2625-01	GBM	0.105	TRUE	TRUE	TRUE	TRUE	FALSE	TRUE	TRUE	4018.1
TCGA-19-2629-01	GBM	0.159	TRUE	TRUE	TRUE	TRUE	FALSE	TRUE	TRUE	4863.96
TCGA-19-4065-01	GBM	0.21	TRUE	TRUE	TRUE	FALSE	FALSE	TRUE	TRUE	1965.79
TCGA-19-4065-02	GBM	0.176	TRUE	FALSE	FALSE	FALSE	FALSE	TRUE	TRUE	NA
TCGA-19-5960-01	GBM	0.051	TRUE	TRUE	TRUE	TRUE	FALSE	TRUE	TRUE	6245.63
TCGA-20-1682-01	OV	0.358	TRUE	FALSE	TRUE	FALSE	FALSE	TRUE	TRUE	10595.3
TCGA-20-1683-01	OV	0.187	TRUE	FALSE	TRUE	FALSE	FALSE	TRUE	TRUE	12436.6
TCGA-20-1684-01	OV	0.131	TRUE	FALSE	TRUE	FALSE	FALSE	TRUE	TRUE	10220.2
TCGA-20-1685-01	OV	0.312	TRUE	FALSE	TRUE	FALSE	FALSE	TRUE	TRUE	6600.04
TCGA-20-1687-01	OV	0.365	TRUE	FALSE	TRUE	FALSE	FALSE	TRUE	TRUE	9046.55
TCGA-21-1070-01	LUSC	0.785	TRUE	TRUE	TRUE	TRUE	FALSE	FALSE	TRUE	2502.99
TCGA-21-1071-01	LUSC	0.317	TRUE	TRUE	TRUE	TRUE	FALSE	FALSE	TRUE	3846.74
TCGA-21-1072-01	LUSC	0.204	TRUE	FALSE	TRUE	FALSE	FALSE	FALSE	TRUE	6861.56
TCGA-21-1075-01	LUSC	0.054	TRUE	FALSE	TRUE	FALSE	FALSE	FALSE	TRUE	6989.75
TCGA-21-1076-01	LUSC	0.739	TRUE	TRUE	TRUE	TRUE	FALSE	FALSE	TRUE	1504.07
TCGA-21-1077-01	LUSC	0.257	TRUE	TRUE	TRUE	TRUE	FALSE	FALSE	TRUE	4344.93
TCGA-21-1078-01	LUSC	0.156	TRUE	TRUE	TRUE	TRUE	FALSE	FALSE	TRUE	620.866
TCGA-21-1079-01	LUSC	0.349	TRUE	FALSE	TRUE	FALSE	FALSE	FALSE	TRUE	5071.33
TCGA-21-1080-01	LUSC	0.322	TRUE	FALSE	TRUE	FALSE	FALSE	FALSE	TRUE	5889.95
TCGA-21-1081-01	LUSC	0.156	TRUE	TRUE	TRUE	TRUE	FALSE	FALSE	TRUE	8358.87
TCGA-21-1082-01	LUSC	0.456	TRUE	FALSE	TRUE	FALSE	FALSE	FALSE	TRUE	4725.48
TCGA-21-1083-01	LUSC	0.554	TRUE	FALSE	TRUE	FALSE	FALSE	FALSE	TRUE	3999.67
TCGA-21-5782-01	LUSC	0.428	TRUE	TRUE	TRUE	TRUE	FALSE	TRUE	TRUE	4677.76
TCGA-21-5783-01	LUSC	0.233	TRUE	FALSE	TRUE	FALSE	FALSE	TRUE	TRUE	5423.88
TCGA-21-5784-01	LUSC	0.629	TRUE	TRUE	TRUE	TRUE	FALSE	TRUE	TRUE	758.116
TCGA-21-5786-01	LUSC	0.282	TRUE	TRUE	TRUE	TRUE	FALSE	TRUE	TRUE	10267.4
TCGA-21-5787-01	LUSC	0.721	TRUE	TRUE	TRUE	TRUE	FALSE	TRUE	TRUE	3211.19
TCGA-21-A5DI-01	LUSC	0.323	TRUE	FALSE	TRUE	FALSE	FALSE	TRUE	TRUE	3254.82
TCGA-22-0940-01	LUSC	0.732	TRUE	FALSE	TRUE	FALSE	FALSE	FALSE	TRUE	2625.05
TCGA-22-0944-01	LUSC	0.246	TRUE	TRUE	TRUE	TRUE	FALSE	FALSE	TRUE	3356.02
TCGA-22-1000-01	LUSC	0.673	TRUE	FALSE	TRUE	FALSE	FALSE	FALSE	TRUE	174.016
TCGA-22-1002-01	LUSC	0.474	TRUE	TRUE	TRUE	TRUE	FALSE	FALSE	TRUE	1231.05
TCGA-22-1005-01	LUSC	0.831	TRUE	FALSE	TRUE	FALSE	FALSE	FALSE	TRUE	668.284
TCGA-22-1011-01	LUSC	0.597	TRUE	TRUE	TRUE	TRUE	FALSE	FALSE	TRUE	855.464
TCGA-22-1012-01	LUSC	0.431	TRUE	TRUE	TRUE	TRUE	FALSE	FALSE	TRUE	2848.18
TCGA-22-1016-01	LUSC	0.44	TRUE	TRUE	TRUE	TRUE	FALSE	FALSE	TRUE	1851.43
TCGA-22-1017-01	LUSC	0.492	TRUE	FALSE	TRUE	FALSE	FALSE	FALSE	TRUE	4787.38
TCGA-22-4591-01	LUSC	0.222	TRUE	TRUE	TRUE	TRUE	FALSE	TRUE	TRUE	15725
TCGA-22-4593-01	LUSC	0.188	TRUE	TRUE	TRUE	TRUE	FALSE	TRUE	TRUE	7402.32
TCGA-22-4594-01	LUSC	0.579	TRUE	FALSE	TRUE	FALSE	FALSE	TRUE	TRUE	2059.55
TCGA-22-4595-01	LUSC	0.381	TRUE	TRUE	TRUE	TRUE	FALSE	TRUE	TRUE	5231.93
TCGA-22-4596-01	LUSC	0.73	TRUE	FALSE	TRUE	FALSE	FALSE	TRUE	TRUE	535.491
TCGA-22-4599-01	LUSC	0.648	TRUE	TRUE	TRUE	TRUE	FALSE	FALSE	TRUE	6515.14
TCGA-22-4601-01	LUSC	0.337	TRUE	TRUE	TRUE	TRUE	FALSE	TRUE	TRUE	8160.08
TCGA-22-4604-01	LUSC	0.573	TRUE	TRUE	TRUE	TRUE	FALSE	TRUE	TRUE	6785.74
TCGA-22-4605-01	LUSC	0.361	TRUE	FALSE	TRUE	FALSE	FALSE	TRUE	TRUE	1188.66
TCGA-22-4607-01	LUSC	0.331	TRUE	TRUE	TRUE	TRUE	FALSE	TRUE	TRUE	5102.76
TCGA-22-4609-01	LUSC	0.598	TRUE	FALSE	TRUE	FALSE	FALSE	FALSE	TRUE	2267.27
TCGA-22-4613-01	LUSC	0.557	TRUE	TRUE	TRUE	TRUE	FALSE	TRUE	TRUE	6376.36
TCGA-22-5471-01	LUSC	0.685	TRUE	TRUE	TRUE	TRUE	FALSE	TRUE	TRUE	8401.63
TCGA-22-5472-01	LUSC	0.378	TRUE	TRUE	TRUE	TRUE	FALSE	TRUE	TRUE	1546.84
TCGA-22-5473-01	LUSC	0.248	TRUE	TRUE	TRUE	TRUE	FALSE	TRUE	TRUE	5805.69
TCGA-22-5474-01	LUSC	0.64	TRUE	TRUE	TRUE	TRUE	FALSE	TRUE	TRUE	3314.69
TCGA-22-5477-01	LUSC	0.242	TRUE	TRUE	TRUE	TRUE	FALSE	TRUE	TRUE	9210.24
TCGA-22-5478-01	LUSC	0.274	TRUE	TRUE	TRUE	TRUE	FALSE	TRUE	TRUE	4945.79
TCGA-22-5479-01	LUSC	0.35	TRUE	FALSE	TRUE	FALSE	FALSE	TRUE	TRUE	1136.94
TCGA-22-5480-01	LUSC	0.783	TRUE	TRUE	TRUE	TRUE	FALSE	TRUE	TRUE	3146.88
TCGA-22-5481-01	LUSC	0.646	TRUE	FALSE	TRUE	FALSE	FALSE	TRUE	TRUE	5775.9
TCGA-22-5482-01	LUSC	0.176	TRUE	TRUE	TRUE	TRUE	FALSE	TRUE	TRUE	5145.23
TCGA-22-5483-01	LUSC	0.349	TRUE	FALSE	TRUE	FALSE	FALSE	TRUE	TRUE	4448.05
TCGA-22-5485-01	LUSC	0.185	TRUE	TRUE	TRUE	TRUE	FALSE	TRUE	TRUE	5030.36
TCGA-22-5489-01	LUSC	0.693	TRUE	TRUE	TRUE	TRUE	FALSE	TRUE	TRUE	2497.74
TCGA-22-5491-01	LUSC	0.3	TRUE	TRUE	TRUE	TRUE	FALSE	TRUE	TRUE	5939.95
TCGA-22-5492-01	LUSC	0.61	TRUE	TRUE	TRUE	TRUE	FALSE	TRUE	TRUE	3692.28
TCGA-22-A5C4-01	LUSC	0.208	TRUE	FALSE	TRUE	FALSE	FALSE	TRUE	TRUE	8890.04
TCGA-23-1023-01	OV	0.504	TRUE	TRUE	TRUE	TRUE	FALSE	TRUE	TRUE	3844.55
TCGA-23-1026-01	OV	0.54	TRUE	TRUE	TRUE	TRUE	FALSE	FALSE	TRUE	5886.11
TCGA-23-1027-01	OV	0.336	TRUE	FALSE	TRUE	TRUE	FALSE	FALSE	TRUE	8139.66
TCGA-23-1029-01	OV	0.322	TRUE	FALSE	TRUE	FALSE	FALSE	TRUE	TRUE	8387.05
TCGA-23-1109-01	OV	0.272	TRUE	TRUE	TRUE	FALSE	FALSE	FALSE	TRUE	9003.56
TCGA-23-1111-01	OV	0.152	TRUE	FALSE	TRUE	FALSE	FALSE	FALSE	TRUE	11499.6
TCGA-23-1114-01	OV	0.076	TRUE	FALSE	TRUE	FALSE	FALSE	TRUE	TRUE	10244.1
TCGA-23-1120-01	OV	0.562	TRUE	TRUE	TRUE	TRUE	FALSE	TRUE	TRUE	8635.68
TCGA-23-1122-01	OV	0.249	TRUE	FALSE	TRUE	TRUE	FALSE	FALSE	TRUE	5393.31
TCGA-23-1123-01	OV	0.545	TRUE	FALSE	TRUE	TRUE	FALSE	TRUE	TRUE	12279.9
TCGA-23-1809-01	OV	0.154	TRUE	FALSE	TRUE	FALSE	FALSE	TRUE	TRUE	21028
TCGA-23-2077-01	OV	0.378	TRUE	FALSE	TRUE	TRUE	FALSE	TRUE	TRUE	7598.53
TCGA-23-2081-01	OV	0.127	TRUE	FALSE	TRUE	TRUE	FALSE	TRUE	TRUE	6953.77
TCGA-23-2084-01	OV	0.351	TRUE	FALSE	TRUE	FALSE	FALSE	TRUE	TRUE	8576.45
TCGA-24-0975-01	OV	0.284	TRUE	FALSE	TRUE	TRUE	FALSE	FALSE	TRUE	1682.91
TCGA-24-1103-01	OV	0.156	TRUE	FALSE	TRUE	TRUE	FALSE	TRUE	TRUE	8942.63
TCGA-24-1413-01	OV	0.332	TRUE	FALSE	TRUE	TRUE	FALSE	TRUE	TRUE	11567.2
TCGA-24-1416-01	OV	0.227	TRUE	FALSE	TRUE	TRUE	FALSE	TRUE	TRUE	5830.67
TCGA-24-1417-01	OV	0.621	TRUE	FALSE	TRUE	TRUE	FALSE	TRUE	TRUE	6364.41
TCGA-24-1418-01	OV	0.282	TRUE	FALSE	TRUE	TRUE	FALSE	TRUE	TRUE	5591.34
TCGA-24-1419-01	OV	0.081	TRUE	FALSE	TRUE	TRUE	FALSE	TRUE	TRUE	6860.04
TCGA-24-1423-01	OV	0.367	TRUE	FALSE	TRUE	TRUE	FALSE	TRUE	TRUE	8736.56
TCGA-24-1424-01	OV	0.244	TRUE	FALSE	TRUE	TRUE	FALSE	FALSE	TRUE	9700.43
TCGA-24-1427-01	OV	0.337	TRUE	FALSE	TRUE	TRUE	FALSE	TRUE	TRUE	5834.45
TCGA-24-1428-01	OV	0.547	TRUE	FALSE	TRUE	TRUE	FALSE	TRUE	TRUE	10424.7
TCGA-24-1430-01	OV	0.092	TRUE	FALSE	TRUE	FALSE	FALSE	TRUE	TRUE	6976.54
TCGA-24-1436-01	OV	0.46	TRUE	FALSE	TRUE	TRUE	FALSE	TRUE	TRUE	6966.31
TCGA-24-1467-01	OV	0.243	TRUE	FALSE	TRUE	FALSE	FALSE	TRUE	TRUE	6307.78
TCGA-24-1469-01	OV	0.335	TRUE	FALSE	TRUE	TRUE	FALSE	TRUE	TRUE	6059.68
TCGA-24-1474-01	OV	0.221	TRUE	FALSE	TRUE	TRUE	FALSE	TRUE	TRUE	15309.4
TCGA-24-1544-01	OV	0.116	TRUE	TRUE	TRUE	TRUE	FALSE	TRUE	TRUE	9574.5
TCGA-24-1548-01	OV	0.278	TRUE	TRUE	TRUE	TRUE	FALSE	TRUE	TRUE	9193.5
TCGA-24-1549-01	OV	0.518	TRUE	FALSE	TRUE	TRUE	FALSE	TRUE	TRUE	7551.73
TCGA-24-1550-01	OV	0.318	TRUE	FALSE	TRUE	FALSE	FALSE	TRUE	TRUE	6194.81
TCGA-24-1551-01	OV	0.54	TRUE	FALSE	TRUE	TRUE	FALSE	TRUE	TRUE	7549.49
TCGA-24-1552-01	OV	0.124	TRUE	FALSE	TRUE	TRUE	FALSE	TRUE	TRUE	8920.85
TCGA-24-1553-01	OV	0.727	TRUE	TRUE	TRUE	TRUE	FALSE	TRUE	TRUE	5481.6
TCGA-24-1555-01	OV	0.267	TRUE	TRUE	TRUE	TRUE	FALSE	TRUE	TRUE	5379.45
TCGA-24-1556-01	OV	0.439	TRUE	TRUE	TRUE	TRUE	FALSE	TRUE	TRUE	9231.87
TCGA-24-1557-01	OV	0.221	TRUE	TRUE	TRUE	TRUE	FALSE	TRUE	TRUE	10810.3
TCGA-24-1558-01	OV	0.138	TRUE	TRUE	TRUE	TRUE	FALSE	TRUE	TRUE	13260
TCGA-24-1560-01	OV	0.246	TRUE	TRUE	TRUE	TRUE	FALSE	TRUE	TRUE	3809.89
TCGA-24-1562-01	OV	0.393	TRUE	FALSE	TRUE	TRUE	FALSE	TRUE	TRUE	4846.3
TCGA-24-1563-01	OV	0.402	TRUE	FALSE	TRUE	TRUE	FALSE	TRUE	TRUE	7180.5
TCGA-24-1564-01	OV	0.445	TRUE	FALSE	TRUE	TRUE	FALSE	TRUE	TRUE	3194.14
TCGA-24-1567-01	OV	0.086	TRUE	TRUE	TRUE	TRUE	FALSE	TRUE	TRUE	9419.7
TCGA-24-1603-01	OV	0.315	TRUE	FALSE	TRUE	TRUE	FALSE	TRUE	TRUE	5806.93
TCGA-24-1604-01	OV	0.383	TRUE	TRUE	TRUE	TRUE	FALSE	TRUE	TRUE	8819.58
TCGA-24-1616-01	OV	0.176	TRUE	FALSE	TRUE	TRUE	FALSE	TRUE	TRUE	11051
TCGA-24-1842-01	OV	0.547	TRUE	FALSE	TRUE	FALSE	FALSE	TRUE	TRUE	8252.92
TCGA-24-1843-01	OV	0.486	TRUE	FALSE	TRUE	FALSE	FALSE	TRUE	TRUE	6541.59
TCGA-24-1844-01	OV	0.079	TRUE	FALSE	TRUE	FALSE	FALSE	TRUE	TRUE	7768.97
TCGA-24-1846-01	OV	0.587	TRUE	FALSE	TRUE	FALSE	FALSE	TRUE	TRUE	9469.87
TCGA-24-1847-01	OV	0.692	TRUE	FALSE	TRUE	FALSE	FALSE	TRUE	TRUE	7059.41
TCGA-24-1850-01	OV	0.248	TRUE	FALSE	TRUE	FALSE	FALSE	TRUE	TRUE	13997.5
TCGA-24-1924-01	OV	0.645	TRUE	FALSE	TRUE	FALSE	FALSE	TRUE	TRUE	9818
TCGA-24-1930-01	OV	0.614	TRUE	FALSE	TRUE	FALSE	FALSE	TRUE	TRUE	6423.83
TCGA-24-2019-01	OV	0.318	TRUE	FALSE	TRUE	TRUE	FALSE	TRUE	TRUE	13847.4
TCGA-24-2020-01	OV	0.08	TRUE	FALSE	TRUE	FALSE	FALSE	TRUE	TRUE	19794.9
TCGA-24-2023-01	OV	0.338	TRUE	FALSE	TRUE	FALSE	FALSE	TRUE	TRUE	14304
TCGA-24-2024-01	OV	0.251	TRUE	FALSE	TRUE	TRUE	FALSE	TRUE	TRUE	7594.86
TCGA-24-2026-01	OV	0.543	TRUE	FALSE	TRUE	FALSE	FALSE	TRUE	TRUE	11787
TCGA-24-2027-01	OV	0.131	TRUE	FALSE	TRUE	FALSE	FALSE	TRUE	TRUE	12002.2
TCGA-24-2033-01	OV	0.159	TRUE	FALSE	TRUE	FALSE	FALSE	FALSE	TRUE	10444.6
TCGA-24-2035-01	OV	0.498	TRUE	FALSE	TRUE	TRUE	FALSE	TRUE	TRUE	4333.97
TCGA-24-2036-01	OV	0.08	TRUE	FALSE	TRUE	FALSE	FALSE	TRUE	TRUE	6775.42
TCGA-24-2038-01	OV	0.147	TRUE	FALSE	TRUE	TRUE	FALSE	TRUE	TRUE	4317.84
TCGA-24-2254-01	OV	0.155	TRUE	FALSE	TRUE	TRUE	FALSE	TRUE	TRUE	7993.42
TCGA-24-2261-01	OV	0.617	TRUE	FALSE	TRUE	TRUE	FALSE	TRUE	TRUE	9052.98
TCGA-24-2262-01	OV	0.46	TRUE	FALSE	TRUE	TRUE	FALSE	TRUE	TRUE	7305.66
TCGA-24-2267-01	OV	0.642	TRUE	FALSE	TRUE	TRUE	FALSE	TRUE	TRUE	3848.62
TCGA-24-2271-01	OV	0.509	TRUE	FALSE	TRUE	TRUE	FALSE	TRUE	TRUE	4079.04
TCGA-24-2281-01	OV	0.572	TRUE	FALSE	TRUE	TRUE	FALSE	TRUE	TRUE	6048.44
TCGA-24-2288-01	OV	0.543	TRUE	FALSE	TRUE	TRUE	FALSE	TRUE	TRUE	5262.66
TCGA-24-2290-01	OV	0.362	TRUE	FALSE	TRUE	TRUE	FALSE	TRUE	TRUE	8761.02
TCGA-24-2297-01	OV	0.218	TRUE	FALSE	TRUE	FALSE	FALSE	TRUE	TRUE	7951.06
TCGA-24-2298-01	OV	0.283	TRUE	FALSE	TRUE	TRUE	FALSE	TRUE	TRUE	6583.62
TCGA-25-1312-01	OV	0.252	TRUE	FALSE	TRUE	FALSE	FALSE	TRUE	TRUE	20434.3
TCGA-25-1313-01	OV	0.503	TRUE	FALSE	TRUE	TRUE	FALSE	TRUE	TRUE	8685.55
TCGA-25-1314-01	OV	0.354	TRUE	FALSE	TRUE	FALSE	FALSE	TRUE	TRUE	17067.5
TCGA-25-1315-01	OV	0.094	TRUE	FALSE	TRUE	TRUE	FALSE	TRUE	TRUE	15414.3
TCGA-25-1316-01	OV	0.264	TRUE	FALSE	TRUE	TRUE	FALSE	TRUE	TRUE	14279.9
TCGA-25-1317-01	OV	0.189	TRUE	TRUE	TRUE	TRUE	FALSE	TRUE	TRUE	10989.6
TCGA-25-1318-01	OV	0.227	TRUE	TRUE	TRUE	TRUE	FALSE	TRUE	TRUE	11329.2
TCGA-25-1319-01	OV	0.343	TRUE	FALSE	TRUE	TRUE	FALSE	TRUE	TRUE	14908.7
TCGA-25-1321-01	OV	0.221	TRUE	FALSE	TRUE	TRUE	FALSE	TRUE	TRUE	19412.6
TCGA-25-1322-01	OV	0.305	TRUE	FALSE	TRUE	TRUE	FALSE	TRUE	TRUE	10999.2
TCGA-25-1323-01	OV	0.118	TRUE	FALSE	TRUE	FALSE	FALSE	TRUE	TRUE	21245.1
TCGA-25-1324-01	OV	0.303	TRUE	TRUE	FALSE	TRUE	FALSE	TRUE	TRUE	NA
TCGA-25-1326-01	OV	0.382	TRUE	FALSE	FALSE	TRUE	FALSE	TRUE	TRUE	NA
TCGA-25-1328-01	OV	0.287	TRUE	FALSE	FALSE	TRUE	FALSE	TRUE	TRUE	NA
TCGA-25-1329-01	OV	0.182	TRUE	FALSE	TRUE	TRUE	FALSE	TRUE	TRUE	16402.5
TCGA-25-1623-01	OV	0.637	TRUE	TRUE	TRUE	TRUE	FALSE	TRUE	TRUE	2542.34
TCGA-25-1625-01	OV	0.412	TRUE	TRUE	TRUE	TRUE	FALSE	TRUE	TRUE	4752.16
TCGA-25-1627-01	OV	0.187	TRUE	TRUE	TRUE	TRUE	FALSE	TRUE	TRUE	13558.5
TCGA-25-1630-01	OV	0.393	TRUE	TRUE	TRUE	TRUE	FALSE	TRUE	TRUE	5002.83
TCGA-25-1631-01	OV	0.2	TRUE	TRUE	TRUE	TRUE	FALSE	TRUE	TRUE	6082.57
TCGA-25-1632-01	OV	0.07	TRUE	TRUE	TRUE	TRUE	FALSE	TRUE	TRUE	6581.21
TCGA-25-1633-01	OV	0.446	TRUE	TRUE	TRUE	TRUE	FALSE	TRUE	TRUE	5173.66
TCGA-25-1634-01	OV	0.036	TRUE	TRUE	TRUE	TRUE	FALSE	FALSE	TRUE	9476.68
TCGA-25-1635-01	OV	0.357	TRUE	TRUE	TRUE	TRUE	FALSE	TRUE	TRUE	7812.61
TCGA-25-1870-01	OV	0.223	TRUE	FALSE	TRUE	FALSE	FALSE	FALSE	TRUE	13702
TCGA-25-1871-01	OV	0.046	TRUE	FALSE	TRUE	FALSE	FALSE	TRUE	TRUE	14166.4
TCGA-25-2391-01	OV	0.318	TRUE	FALSE	TRUE	TRUE	FALSE	TRUE	TRUE	6331.95
TCGA-25-2392-01	OV	0.412	TRUE	FALSE	TRUE	TRUE	FALSE	TRUE	TRUE	9812.5
TCGA-25-2393-01	OV	0.221	TRUE	FALSE	TRUE	TRUE	FALSE	TRUE	TRUE	10869.6
TCGA-25-2396-01	OV	0.435	TRUE	FALSE	TRUE	TRUE	FALSE	TRUE	TRUE	9608.37
TCGA-25-2397-01	OV	0.215	TRUE	FALSE	TRUE	FALSE	FALSE	TRUE	TRUE	9974.88
TCGA-25-2399-01	OV	0.437	TRUE	FALSE	TRUE	TRUE	FALSE	TRUE	TRUE	7481.33
TCGA-25-2400-01	OV	0.148	TRUE	FALSE	TRUE	TRUE	FALSE	TRUE	TRUE	14707.9
TCGA-25-2404-01	OV	0.313	TRUE	FALSE	TRUE	TRUE	FALSE	TRUE	TRUE	6506.42
TCGA-25-2409-01	OV	0.415	TRUE	FALSE	TRUE	TRUE	FALSE	TRUE	TRUE	7190.34
TCGA-26-1442-01	GBM	0.067	TRUE	TRUE	TRUE	TRUE	FALSE	TRUE	TRUE	1724.18
TCGA-26-5132-01	GBM	0.201	TRUE	TRUE	TRUE	TRUE	FALSE	TRUE	TRUE	3386.69
TCGA-26-5133-01	GBM	0.046	TRUE	TRUE	TRUE	TRUE	FALSE	TRUE	TRUE	3927.88
TCGA-26-5134-01	GBM	0.09	TRUE	TRUE	TRUE	TRUE	FALSE	TRUE	TRUE	1978.8
TCGA-26-5135-01	GBM	0.14	TRUE	TRUE	TRUE	TRUE	FALSE	FALSE	TRUE	1999.96
TCGA-26-5136-01	GBM	0.335	TRUE	TRUE	TRUE	TRUE	FALSE	TRUE	TRUE	4132.57
TCGA-26-5139-01	GBM	0.176	TRUE	TRUE	TRUE	TRUE	FALSE	TRUE	TRUE	1970.41
TCGA-27-1830-01	GBM	0.198	TRUE	TRUE	TRUE	TRUE	FALSE	TRUE	TRUE	2398.94
TCGA-27-1831-01	GBM	0.295	TRUE	TRUE	TRUE	TRUE	FALSE	TRUE	TRUE	2144.07
TCGA-27-1832-01	GBM	0.328	TRUE	TRUE	TRUE	TRUE	FALSE	TRUE	TRUE	2285.04
TCGA-27-1834-01	GBM	0.217	TRUE	TRUE	TRUE	TRUE	FALSE	TRUE	TRUE	3107.81
TCGA-27-1835-01	GBM	0.095	TRUE	TRUE	TRUE	TRUE	FALSE	TRUE	TRUE	4595.86
TCGA-27-1837-01	GBM	0.142	TRUE	TRUE	TRUE	TRUE	FALSE	TRUE	TRUE	1765
TCGA-27-2519-01	GBM	0.262	TRUE	TRUE	TRUE	TRUE	FALSE	TRUE	TRUE	3177.38
TCGA-27-2521-01	GBM	0.045	TRUE	TRUE	TRUE	TRUE	FALSE	TRUE	TRUE	3246.39
TCGA-27-2523-01	GBM	0.06	TRUE	TRUE	TRUE	TRUE	FALSE	TRUE	TRUE	2789.39
TCGA-27-2524-01	GBM	0.169	TRUE	TRUE	TRUE	TRUE	FALSE	TRUE	TRUE	3968.14
TCGA-27-2526-01	GBM	0.289	TRUE	TRUE	TRUE	TRUE	FALSE	FALSE	TRUE	5117.49
TCGA-27-2528-01	GBM	0.052	TRUE	TRUE	TRUE	TRUE	FALSE	TRUE	TRUE	3042.67
TCGA-28-1747-01	GBM	0.251	TRUE	TRUE	TRUE	TRUE	FALSE	TRUE	TRUE	1761.99
TCGA-28-1753-01	GBM	0.213	TRUE	TRUE	TRUE	TRUE	FALSE	TRUE	TRUE	1227.99
TCGA-28-2499-01	GBM	0.186	TRUE	TRUE	FALSE	TRUE	FALSE	TRUE	FALSE	NA
TCGA-28-2509-01	GBM	0.12	TRUE	TRUE	TRUE	TRUE	FALSE	TRUE	TRUE	3382.24
TCGA-28-2510-01	GBM	0.098	TRUE	TRUE	TRUE	FALSE	FALSE	TRUE	FALSE	385.822
TCGA-28-2513-01	GBM	0.32	TRUE	TRUE	TRUE	TRUE	FALSE	TRUE	TRUE	719.376
TCGA-28-2514-01	GBM	0.096	TRUE	TRUE	TRUE	TRUE	FALSE	TRUE	TRUE	3278.37
TCGA-28-5204-01	GBM	0.144	TRUE	TRUE	TRUE	TRUE	FALSE	TRUE	TRUE	5173.56
TCGA-28-5207-01	GBM	0.126	TRUE	TRUE	TRUE	TRUE	FALSE	TRUE	TRUE	3801.02
TCGA-28-5208-01	GBM	0.107	TRUE	TRUE	TRUE	TRUE	FALSE	TRUE	TRUE	3727.33
TCGA-28-5209-01	GBM	0.092	TRUE	TRUE	TRUE	TRUE	FALSE	TRUE	TRUE	3829.04
TCGA-28-5213-01	GBM	0.405	TRUE	TRUE	TRUE	TRUE	FALSE	TRUE	TRUE	1358.81
TCGA-28-5215-01	GBM	0.174	TRUE	TRUE	TRUE	TRUE	FALSE	TRUE	TRUE	2191.33
TCGA-28-5216-01	GBM	0.106	TRUE	TRUE	TRUE	TRUE	FALSE	TRUE	TRUE	2926.43
TCGA-28-5218-01	GBM	0.292	TRUE	TRUE	TRUE	TRUE	FALSE	TRUE	TRUE	7639.2
TCGA-28-5220-01	GBM	0.129	TRUE	TRUE	TRUE	TRUE	FALSE	TRUE	TRUE	4601.63
TCGA-29-1688-01	OV	0.531	TRUE	FALSE	TRUE	FALSE	FALSE	TRUE	TRUE	9067.48
TCGA-29-1690-01	OV	0.411	TRUE	FALSE	TRUE	FALSE	FALSE	TRUE	TRUE	2705.13
TCGA-29-1691-01	OV	0.315	TRUE	FALSE	TRUE	FALSE	FALSE	TRUE	TRUE	11846.7
TCGA-29-1693-01	OV	0.327	TRUE	FALSE	TRUE	FALSE	FALSE	TRUE	TRUE	10998.4
TCGA-29-1694-01	OV	0.299	TRUE	FALSE	TRUE	FALSE	FALSE	TRUE	TRUE	6851.4
TCGA-29-1695-01	OV	0.451	TRUE	FALSE	TRUE	FALSE	FALSE	TRUE	TRUE	12754.1
TCGA-29-1696-01	OV	0.298	TRUE	FALSE	TRUE	FALSE	FALSE	TRUE	TRUE	8421.75
TCGA-29-1697-01	OV	0.182	TRUE	FALSE	TRUE	FALSE	FALSE	TRUE	TRUE	9028.13
TCGA-29-1699-01	OV	0.536	TRUE	FALSE	TRUE	FALSE	FALSE	TRUE	TRUE	8073.42
TCGA-29-1701-01	OV	0.474	TRUE	FALSE	TRUE	FALSE	FALSE	TRUE	TRUE	10598.2
TCGA-29-1702-01	OV	0.109	TRUE	FALSE	TRUE	FALSE	FALSE	TRUE	TRUE	18762.6
TCGA-29-1703-01	OV	0.245	TRUE	FALSE	TRUE	FALSE	FALSE	TRUE	TRUE	13895.3
TCGA-29-1705-01	OV	0.203	TRUE	FALSE	TRUE	FALSE	FALSE	TRUE	TRUE	7900.38
TCGA-29-1710-01	OV	0.709	TRUE	FALSE	TRUE	FALSE	FALSE	TRUE	TRUE	5705.05
TCGA-29-1711-01	OV	0.522	TRUE	FALSE	TRUE	FALSE	FALSE	TRUE	TRUE	12580.3
TCGA-29-1761-01	OV	0.386	TRUE	FALSE	TRUE	FALSE	FALSE	TRUE	TRUE	12463.1
TCGA-29-1762-01	OV	0.082	TRUE	FALSE	TRUE	FALSE	FALSE	TRUE	TRUE	7303.59
TCGA-29-1763-01	OV	0.365	TRUE	FALSE	TRUE	FALSE	FALSE	TRUE	TRUE	11505
TCGA-29-1770-01	OV	0.227	TRUE	FALSE	TRUE	FALSE	FALSE	TRUE	TRUE	11885.2
TCGA-29-1770-02	OV	0.219	TRUE	FALSE	FALSE	FALSE	FALSE	TRUE	TRUE	NA
TCGA-29-1776-01	OV	0.246	TRUE	FALSE	TRUE	FALSE	FALSE	TRUE	TRUE	9256.91
TCGA-29-1778-01	OV	0.445	TRUE	FALSE	TRUE	FALSE	FALSE	TRUE	TRUE	17223
TCGA-29-1781-01	OV	0.656	TRUE	FALSE	TRUE	FALSE	FALSE	TRUE	TRUE	8074.53
TCGA-29-1783-01	OV	0.397	TRUE	FALSE	TRUE	FALSE	FALSE	TRUE	TRUE	8623.59
TCGA-29-1784-01	OV	0.594	TRUE	FALSE	TRUE	FALSE	FALSE	TRUE	TRUE	8852.99
TCGA-29-1785-01	OV	0.669	TRUE	FALSE	TRUE	FALSE	FALSE	TRUE	TRUE	6313.38
TCGA-29-2414-01	OV	0.112	TRUE	FALSE	TRUE	FALSE	FALSE	TRUE	TRUE	7411.37
TCGA-29-2414-02	OV	0.481	TRUE	FALSE	FALSE	FALSE	FALSE	TRUE	TRUE	NA
TCGA-29-2425-01	OV	0.181	TRUE	FALSE	TRUE	FALSE	FALSE	TRUE	TRUE	9393.19
TCGA-29-2427-01	OV	0.774	TRUE	FALSE	TRUE	TRUE	FALSE	TRUE	TRUE	4309.84
TCGA-29-2428-01	OV	0.576	TRUE	FALSE	TRUE	FALSE	FALSE	TRUE	TRUE	7837.2
TCGA-2A-A8VL-01	PRAD	0.157	TRUE	FALSE	TRUE	FALSE	FALSE	FALSE	TRUE	243.165
TCGA-2A-A8VO-01	PRAD	0.201	TRUE	FALSE	TRUE	FALSE	FALSE	TRUE	TRUE	179.416
TCGA-2A-A8VT-01	PRAD	0.174	TRUE	FALSE	TRUE	FALSE	FALSE	TRUE	TRUE	1784.08
TCGA-2A-A8VV-01	PRAD	0.083	TRUE	FALSE	TRUE	FALSE	FALSE	TRUE	TRUE	135.397
TCGA-2A-A8VX-01	PRAD	0.042	TRUE	FALSE	TRUE	FALSE	FALSE	TRUE	TRUE	1129.76
TCGA-2A-A8W1-01	PRAD	0.069	TRUE	FALSE	TRUE	FALSE	FALSE	TRUE	TRUE	1824.72
TCGA-2A-A8W3-01	PRAD	0.131	TRUE	FALSE	TRUE	FALSE	FALSE	TRUE	TRUE	329.364
TCGA-2A-AAYF-01	PRAD	0.099	TRUE	FALSE	TRUE	FALSE	FALSE	FALSE	TRUE	424.641
TCGA-2A-AAYO-01	PRAD	0.346	TRUE	FALSE	TRUE	FALSE	FALSE	TRUE	TRUE	264.557
TCGA-2A-AAYU-01	PRAD	0.092	TRUE	FALSE	TRUE	FALSE	FALSE	TRUE	TRUE	665.113
TCGA-2E-A9G8-01	UCEC	0.487	TRUE	FALSE	TRUE	FALSE	FALSE	TRUE	TRUE	10103.2
TCGA-2F-A9KO-01	BLCA	0.708	TRUE	FALSE	TRUE	FALSE	FALSE	TRUE	TRUE	1734.9
TCGA-2F-A9KP-01	BLCA	0.059	TRUE	FALSE	TRUE	FALSE	FALSE	TRUE	TRUE	4236.11
TCGA-2F-A9KQ-01	BLCA	0.06	TRUE	FALSE	TRUE	FALSE	FALSE	TRUE	TRUE	3483.18
TCGA-2F-A9KR-01	BLCA	0.249	TRUE	FALSE	TRUE	FALSE	FALSE	TRUE	TRUE	4793.06
TCGA-2F-A9KT-01	BLCA	0.091	TRUE	FALSE	TRUE	FALSE	FALSE	TRUE	TRUE	3106.71
TCGA-2F-A9KW-01	BLCA	0.237	TRUE	FALSE	TRUE	FALSE	FALSE	TRUE	TRUE	4295.58
TCGA-2G-AAEW-01	TGCT	0.656	TRUE	TRUE	TRUE	FALSE	FALSE	TRUE	TRUE	1263.95
TCGA-2G-AAEX-01	TGCT	0.597	TRUE	TRUE	TRUE	FALSE	FALSE	TRUE	TRUE	3289.03
TCGA-2G-AAF1-01	TGCT	0.694	TRUE	TRUE	TRUE	FALSE	FALSE	TRUE	TRUE	214.33
TCGA-2G-AAF4-01	TGCT	0.629	TRUE	TRUE	TRUE	FALSE	FALSE	TRUE	TRUE	2841.27
TCGA-2G-AAF6-01	TGCT	0.57	TRUE	TRUE	TRUE	FALSE	FALSE	TRUE	TRUE	2734.4
TCGA-2G-AAF8-01	TGCT	0.522	TRUE	TRUE	TRUE	FALSE	FALSE	TRUE	TRUE	4444.46
TCGA-2G-AAFE-01	TGCT	0.511	TRUE	FALSE	TRUE	FALSE	FALSE	TRUE	TRUE	2186.13
TCGA-2G-AAFG-01	TGCT	0.697	TRUE	TRUE	TRUE	FALSE	FALSE	TRUE	TRUE	2944.01
TCGA-2G-AAFG-05	TGCT	0.753	TRUE	TRUE	FALSE	FALSE	FALSE	TRUE	TRUE	NA
TCGA-2G-AAFH-01	TGCT	0.649	TRUE	TRUE	TRUE	FALSE	FALSE	TRUE	TRUE	3566.58
TCGA-2G-AAFI-01	TGCT	0.297	TRUE	TRUE	TRUE	FALSE	FALSE	TRUE	TRUE	8675.41
TCGA-2G-AAFJ-01	TGCT	0.108	TRUE	TRUE	TRUE	FALSE	FALSE	TRUE	FALSE	5552.08
TCGA-2G-AAFL-01	TGCT	0.459	TRUE	TRUE	TRUE	FALSE	FALSE	TRUE	TRUE	588.805
TCGA-2G-AAFM-01	TGCT	0.626	TRUE	TRUE	TRUE	FALSE	FALSE	TRUE	TRUE	1312.34
TCGA-2G-AAFN-01	TGCT	0.317	TRUE	TRUE	TRUE	FALSE	FALSE	TRUE	TRUE	5405.84
TCGA-2G-AAFO-01	TGCT	0.467	TRUE	TRUE	TRUE	FALSE	FALSE	TRUE	TRUE	1439.94
TCGA-2G-AAFV-01	TGCT	0.227	TRUE	TRUE	TRUE	FALSE	FALSE	TRUE	TRUE	8439.66
TCGA-2G-AAFY-01	TGCT	0.613	TRUE	TRUE	TRUE	FALSE	FALSE	TRUE	TRUE	1136.07
TCGA-2G-AAFZ-01	TGCT	0.169	TRUE	TRUE	TRUE	FALSE	FALSE	TRUE	TRUE	7619.22
TCGA-2G-AAG0-01	TGCT	0.454	TRUE	TRUE	TRUE	FALSE	FALSE	TRUE	TRUE	1758.8
TCGA-2G-AAG3-01	TGCT	0.323	TRUE	TRUE	TRUE	FALSE	FALSE	TRUE	TRUE	6066.25
TCGA-2G-AAG5-01	TGCT	0.329	TRUE	TRUE	TRUE	FALSE	FALSE	TRUE	TRUE	4559.3
TCGA-2G-AAG6-01	TGCT	0.242	TRUE	TRUE	TRUE	FALSE	FALSE	TRUE	TRUE	4360.02
TCGA-2G-AAG7-01	TGCT	0.16	TRUE	TRUE	TRUE	FALSE	FALSE	TRUE	TRUE	4825.39
TCGA-2G-AAG8-01	TGCT	0.38	TRUE	TRUE	TRUE	FALSE	FALSE	TRUE	TRUE	2568.74
TCGA-2G-AAG9-01	TGCT	0.591	TRUE	TRUE	TRUE	FALSE	FALSE	TRUE	TRUE	3403.56
TCGA-2G-AAGA-01	TGCT	0.152	TRUE	TRUE	TRUE	FALSE	FALSE	TRUE	TRUE	3897.18
TCGA-2G-AAGC-01	TGCT	0.47	TRUE	TRUE	TRUE	FALSE	FALSE	TRUE	TRUE	2987.99
TCGA-2G-AAGE-01	TGCT	0.265	TRUE	TRUE	TRUE	FALSE	FALSE	FALSE	TRUE	6093.36
TCGA-2G-AAGF-01	TGCT	0.248	TRUE	TRUE	TRUE	FALSE	FALSE	TRUE	TRUE	4715.8
TCGA-2G-AAGG-01	TGCT	0.541	TRUE	TRUE	TRUE	FALSE	FALSE	TRUE	TRUE	3129.33
TCGA-2G-AAGI-01	TGCT	0.432	TRUE	TRUE	TRUE	FALSE	FALSE	TRUE	TRUE	9264.3
TCGA-2G-AAGI-05	TGCT	0.643	TRUE	TRUE	FALSE	FALSE	FALSE	TRUE	TRUE	NA
TCGA-2G-AAGJ-01	TGCT	0.475	TRUE	TRUE	TRUE	FALSE	FALSE	TRUE	TRUE	2094.18
TCGA-2G-AAGK-01	TGCT	0.43	TRUE	TRUE	TRUE	FALSE	FALSE	TRUE	TRUE	2888.99
TCGA-2G-AAGM-01	TGCT	0.114	TRUE	TRUE	TRUE	FALSE	FALSE	TRUE	TRUE	6573.78
TCGA-2G-AAGN-01	TGCT	0.306	TRUE	TRUE	TRUE	FALSE	FALSE	TRUE	TRUE	3161.67
TCGA-2G-AAGO-01	TGCT	0.183	TRUE	TRUE	TRUE	FALSE	FALSE	TRUE	TRUE	5057.58
TCGA-2G-AAGP-01	TGCT	0.616	TRUE	TRUE	TRUE	FALSE	FALSE	TRUE	TRUE	1778.27
TCGA-2G-AAGS-01	TGCT	0.121	TRUE	TRUE	TRUE	FALSE	FALSE	TRUE	TRUE	5422.84
TCGA-2G-AAGT-01	TGCT	0.252	TRUE	TRUE	TRUE	FALSE	FALSE	TRUE	TRUE	7368.57
TCGA-2G-AAGV-01	TGCT	0.127	TRUE	TRUE	TRUE	FALSE	FALSE	TRUE	TRUE	4152.76
TCGA-2G-AAGW-01	TGCT	0.079	TRUE	TRUE	TRUE	FALSE	FALSE	TRUE	TRUE	9816.55
TCGA-2G-AAGX-01	TGCT	0.112	TRUE	TRUE	TRUE	FALSE	FALSE	TRUE	TRUE	3851.95
TCGA-2G-AAGY-01	TGCT	0.245	TRUE	TRUE	TRUE	FALSE	FALSE	TRUE	TRUE	4877.98
TCGA-2G-AAGY-05	TGCT	0.275	TRUE	TRUE	FALSE	FALSE	FALSE	TRUE	TRUE	NA
TCGA-2G-AAGZ-01	TGCT	0.512	TRUE	TRUE	TRUE	FALSE	FALSE	TRUE	TRUE	629.791
TCGA-2G-AAH0-01	TGCT	0.549	TRUE	TRUE	TRUE	FALSE	FALSE	TRUE	TRUE	3163.79
TCGA-2G-AAH2-01	TGCT	0.551	TRUE	TRUE	TRUE	FALSE	FALSE	TRUE	TRUE	7388.6
TCGA-2G-AAH3-01	TGCT	0.368	TRUE	TRUE	TRUE	FALSE	FALSE	TRUE	TRUE	2324.69
TCGA-2G-AAH4-01	TGCT	0.34	TRUE	TRUE	TRUE	FALSE	FALSE	TRUE	TRUE	4227.76
TCGA-2G-AAH8-01	TGCT	0.405	TRUE	TRUE	TRUE	FALSE	FALSE	TRUE	TRUE	6246.82
TCGA-2G-AAHA-01	TGCT	0.777	TRUE	TRUE	TRUE	FALSE	FALSE	TRUE	TRUE	2047.99
TCGA-2G-AAHC-01	TGCT	0.771	TRUE	TRUE	TRUE	FALSE	FALSE	TRUE	TRUE	1168.85
TCGA-2G-AAHG-01	TGCT	0.284	TRUE	TRUE	TRUE	FALSE	FALSE	TRUE	TRUE	4048.06
TCGA-2G-AAHL-01	TGCT	0.516	TRUE	TRUE	TRUE	FALSE	FALSE	TRUE	TRUE	2334.82
TCGA-2G-AAHN-01	TGCT	0.777	TRUE	TRUE	TRUE	FALSE	FALSE	TRUE	TRUE	685.635
TCGA-2G-AAHP-01	TGCT	0.266	TRUE	TRUE	TRUE	FALSE	FALSE	TRUE	TRUE	5099.38
TCGA-2G-AAHP-05	TGCT	0.597	TRUE	TRUE	FALSE	FALSE	FALSE	TRUE	TRUE	NA
TCGA-2G-AAHT-01	TGCT	0.562	TRUE	TRUE	TRUE	FALSE	FALSE	TRUE	TRUE	2301.34
TCGA-2G-AAKD-01	TGCT	0.431	TRUE	TRUE	TRUE	FALSE	FALSE	TRUE	TRUE	3719.26
TCGA-2G-AAKG-01	TGCT	0.447	TRUE	TRUE	TRUE	FALSE	FALSE	TRUE	TRUE	3062.02
TCGA-2G-AAKG-05	TGCT	0.701	TRUE	TRUE	FALSE	FALSE	FALSE	TRUE	TRUE	NA
TCGA-2G-AAKH-01	TGCT	0.485	TRUE	TRUE	TRUE	FALSE	FALSE	TRUE	TRUE	2236.08
TCGA-2G-AAKL-01	TGCT	0.376	TRUE	TRUE	TRUE	FALSE	FALSE	TRUE	TRUE	4730.99
TCGA-2G-AAKM-01	TGCT	0.228	TRUE	TRUE	TRUE	FALSE	FALSE	TRUE	TRUE	5189.41
TCGA-2G-AAKO-01	TGCT	0.764	TRUE	TRUE	TRUE	FALSE	FALSE	TRUE	FALSE	425.417
TCGA-2G-AAKO-05	TGCT	0.81	TRUE	TRUE	FALSE	FALSE	FALSE	TRUE	FALSE	NA
TCGA-2G-AAL5-01	TGCT	0.093	TRUE	TRUE	TRUE	FALSE	FALSE	TRUE	TRUE	5177.61
TCGA-2G-AAL7-01	TGCT	0.244	TRUE	TRUE	TRUE	FALSE	FALSE	TRUE	TRUE	3786.89
TCGA-2G-AALF-01	TGCT	0.333	TRUE	TRUE	TRUE	FALSE	FALSE	TRUE	FALSE	4408.17
TCGA-2G-AALG-01	TGCT	0.414	TRUE	TRUE	TRUE	FALSE	FALSE	TRUE	FALSE	3698.54
TCGA-2G-AALN-01	TGCT	0.266	TRUE	TRUE	TRUE	FALSE	FALSE	TRUE	FALSE	4923.73
TCGA-2G-AALO-01	TGCT	0.431	TRUE	TRUE	TRUE	FALSE	FALSE	TRUE	FALSE	9334.48
TCGA-2G-AALP-01	TGCT	0.259	TRUE	TRUE	TRUE	FALSE	FALSE	TRUE	TRUE	6278.92
TCGA-2G-AALQ-01	TGCT	0.221	TRUE	TRUE	TRUE	FALSE	FALSE	TRUE	FALSE	5268.36
TCGA-2G-AALR-01	TGCT	0.132	TRUE	TRUE	TRUE	FALSE	FALSE	TRUE	FALSE	12003.7
TCGA-2G-AALS-01	TGCT	0.716	TRUE	TRUE	TRUE	FALSE	FALSE	TRUE	FALSE	1182.25
TCGA-2G-AALT-01	TGCT	0.467	TRUE	TRUE	TRUE	FALSE	FALSE	TRUE	FALSE	2838.45
TCGA-2G-AALW-01	TGCT	0.493	TRUE	TRUE	TRUE	FALSE	FALSE	TRUE	FALSE	4474.62
TCGA-2G-AALX-01	TGCT	0.35	TRUE	TRUE	TRUE	FALSE	FALSE	TRUE	FALSE	11805.4
TCGA-2G-AALY-01	TGCT	0.356	TRUE	TRUE	TRUE	FALSE	FALSE	TRUE	FALSE	3052.07
TCGA-2G-AALZ-01	TGCT	0.459	TRUE	TRUE	TRUE	FALSE	FALSE	TRUE	FALSE	985.541
TCGA-2G-AAM2-01	TGCT	0.263	TRUE	TRUE	TRUE	FALSE	FALSE	TRUE	FALSE	5977.16
TCGA-2G-AAM3-01	TGCT	0.213	TRUE	TRUE	TRUE	FALSE	FALSE	TRUE	FALSE	5853.04
TCGA-2G-AAM4-01	TGCT	0.191	TRUE	TRUE	TRUE	FALSE	FALSE	TRUE	FALSE	11289.5
TCGA-2H-A9GF-01	ESCA	0.273	TRUE	TRUE	TRUE	FALSE	TRUE	TRUE	TRUE	6160.55
TCGA-2H-A9GG-01	ESCA	0.386	TRUE	FALSE	FALSE	FALSE	TRUE	TRUE	TRUE	NA
TCGA-2H-A9GH-01	ESCA	0.32	TRUE	TRUE	TRUE	FALSE	TRUE	TRUE	TRUE	3833.39
TCGA-2H-A9GI-01	ESCA	0.4	TRUE	TRUE	TRUE	FALSE	TRUE	TRUE	TRUE	4461.07
TCGA-2H-A9GJ-01	ESCA	0.201	TRUE	TRUE	TRUE	FALSE	TRUE	TRUE	TRUE	4911.1
TCGA-2H-A9GK-01	ESCA	0.527	TRUE	TRUE	TRUE	FALSE	TRUE	TRUE	TRUE	2807.31
TCGA-2H-A9GL-01	ESCA	0.416	TRUE	TRUE	TRUE	FALSE	TRUE	TRUE	TRUE	3826.08
TCGA-2H-A9GM-01	ESCA	0.321	TRUE	TRUE	TRUE	FALSE	TRUE	TRUE	TRUE	7809.77
TCGA-2H-A9GN-01	ESCA	0.202	TRUE	TRUE	TRUE	FALSE	TRUE	TRUE	TRUE	4787.1
TCGA-2H-A9GO-01	ESCA	0.111	TRUE	TRUE	TRUE	FALSE	TRUE	TRUE	TRUE	3473.32
TCGA-2H-A9GQ-01	ESCA	0.05	TRUE	TRUE	TRUE	FALSE	TRUE	TRUE	TRUE	4889.93
TCGA-2H-A9GR-01	ESCA	0.379	TRUE	TRUE	TRUE	FALSE	TRUE	TRUE	TRUE	2179.32
TCGA-2J-AAB1-01	PAAD	0.579	TRUE	TRUE	TRUE	FALSE	FALSE	FALSE	TRUE	279.623
TCGA-2J-AAB4-01	PAAD	0.567	TRUE	TRUE	TRUE	FALSE	FALSE	TRUE	TRUE	696.362
TCGA-2J-AAB6-01	PAAD	0.37	TRUE	TRUE	TRUE	FALSE	FALSE	TRUE	TRUE	6387.99
TCGA-2J-AAB8-01	PAAD	0.404	TRUE	TRUE	TRUE	FALSE	FALSE	FALSE	TRUE	584.441
TCGA-2J-AAB9-01	PAAD	0.44	TRUE	TRUE	TRUE	FALSE	FALSE	TRUE	TRUE	79.5557
TCGA-2J-AABA-01	PAAD	0.364	TRUE	TRUE	TRUE	FALSE	FALSE	TRUE	TRUE	433.757
TCGA-2J-AABE-01	PAAD	0.358	TRUE	TRUE	TRUE	FALSE	FALSE	TRUE	TRUE	854.254
TCGA-2J-AABF-01	PAAD	0.598	TRUE	TRUE	TRUE	FALSE	FALSE	TRUE	TRUE	763.941
TCGA-2J-AABH-01	PAAD	0.389	TRUE	TRUE	TRUE	FALSE	FALSE	TRUE	TRUE	3290.2
TCGA-2J-AABI-01	PAAD	0.5	TRUE	FALSE	TRUE	FALSE	FALSE	TRUE	TRUE	5252.27
TCGA-2J-AABK-01	PAAD	0.375	TRUE	TRUE	TRUE	FALSE	FALSE	TRUE	TRUE	242.286
TCGA-2J-AABO-01	PAAD	0.309	TRUE	TRUE	TRUE	FALSE	FALSE	TRUE	TRUE	2509.8
TCGA-2J-AABP-01	PAAD	0.612	TRUE	FALSE	TRUE	FALSE	FALSE	TRUE	TRUE	4079.4
TCGA-2J-AABR-01	PAAD	0.63	TRUE	TRUE	TRUE	FALSE	FALSE	TRUE	TRUE	41.0848
TCGA-2J-AABT-01	PAAD	0.533	TRUE	FALSE	TRUE	FALSE	FALSE	TRUE	TRUE	328.613
TCGA-2J-AABU-01	PAAD	0.387	TRUE	TRUE	TRUE	FALSE	FALSE	FALSE	TRUE	2573.44
TCGA-2J-AABV-01	PAAD	0.342	TRUE	TRUE	TRUE	FALSE	FALSE	TRUE	TRUE	140.785
TCGA-2K-A9WE-01	KIRP	0.583	TRUE	FALSE	TRUE	FALSE	FALSE	TRUE	TRUE	599.874
TCGA-2L-AAQA-01	PAAD	0.303	TRUE	TRUE	TRUE	FALSE	FALSE	TRUE	TRUE	2705.11
TCGA-2L-AAQE-01	PAAD	0.398	TRUE	TRUE	TRUE	FALSE	FALSE	TRUE	TRUE	1984.52
TCGA-2L-AAQI-01	PAAD	0.391	TRUE	TRUE	TRUE	FALSE	FALSE	TRUE	TRUE	706.203
TCGA-2L-AAQJ-01	PAAD	0.522	TRUE	TRUE	TRUE	FALSE	FALSE	TRUE	TRUE	1099.85
TCGA-2L-AAQL-01	PAAD	0.464	TRUE	TRUE	TRUE	FALSE	FALSE	TRUE	TRUE	1457.4
TCGA-2L-AAQM-01	PAAD	0.147	TRUE	FALSE	TRUE	FALSE	FALSE	TRUE	TRUE	20552.9
TCGA-2V-A95S-01	LIHC	0.856	TRUE	FALSE	TRUE	FALSE	FALSE	TRUE	FALSE	2427.41
TCGA-2W-A8YY-01	CESC	0.213	TRUE	FALSE	TRUE	FALSE	FALSE	TRUE	FALSE	308.797
TCGA-2X-A9D5-01	TGCT	0.626	TRUE	TRUE	TRUE	FALSE	FALSE	TRUE	TRUE	1915.25
TCGA-2X-A9D6-01	TGCT	0.602	TRUE	TRUE	TRUE	FALSE	FALSE	TRUE	TRUE	1117.95
TCGA-2Y-A9GS-01	LIHC	0.373	TRUE	FALSE	TRUE	FALSE	FALSE	TRUE	TRUE	2622.63
TCGA-2Y-A9GT-01	LIHC	0.803	TRUE	FALSE	TRUE	FALSE	FALSE	TRUE	TRUE	1403.3
TCGA-2Y-A9GU-01	LIHC	0.27	TRUE	FALSE	TRUE	FALSE	FALSE	TRUE	TRUE	6138.49
TCGA-2Y-A9GV-01	LIHC	0.597	TRUE	FALSE	TRUE	FALSE	FALSE	FALSE	TRUE	1155.69
TCGA-2Y-A9GW-01	LIHC	0.551	TRUE	FALSE	TRUE	FALSE	FALSE	TRUE	TRUE	7608.06
TCGA-2Y-A9GX-01	LIHC	0.588	TRUE	FALSE	TRUE	FALSE	FALSE	FALSE	TRUE	164.192
TCGA-2Y-A9GY-01	LIHC	0.662	TRUE	FALSE	TRUE	FALSE	FALSE	TRUE	TRUE	3584.97
TCGA-2Y-A9GZ-01	LIHC	0.175	TRUE	FALSE	TRUE	FALSE	FALSE	TRUE	TRUE	6520.36
TCGA-2Y-A9H0-01	LIHC	0.648	TRUE	FALSE	TRUE	FALSE	FALSE	TRUE	TRUE	8731.92
TCGA-2Y-A9H1-01	LIHC	0.455	TRUE	FALSE	TRUE	FALSE	FALSE	TRUE	TRUE	9135.27
TCGA-2Y-A9H2-01	LIHC	0.474	TRUE	FALSE	TRUE	FALSE	FALSE	TRUE	TRUE	4632.07
TCGA-2Y-A9H3-01	LIHC	0.568	TRUE	FALSE	TRUE	FALSE	FALSE	FALSE	TRUE	3377.67
TCGA-2Y-A9H4-01	LIHC	0.414	TRUE	FALSE	TRUE	FALSE	FALSE	TRUE	TRUE	3493.2
TCGA-2Y-A9H5-01	LIHC	0.354	TRUE	FALSE	TRUE	FALSE	FALSE	TRUE	TRUE	3736.81
TCGA-2Y-A9H6-01	LIHC	0.443	TRUE	FALSE	TRUE	FALSE	FALSE	TRUE	TRUE	2670.15
TCGA-2Y-A9H7-01	LIHC	0.281	TRUE	FALSE	TRUE	FALSE	FALSE	TRUE	TRUE	2797.32
TCGA-2Y-A9H8-01	LIHC	0.565	TRUE	FALSE	TRUE	FALSE	FALSE	TRUE	TRUE	5631.98
TCGA-2Y-A9H9-01	LIHC	0.421	TRUE	FALSE	TRUE	FALSE	FALSE	TRUE	TRUE	4911.85
TCGA-2Y-A9HA-01	LIHC	0.256	TRUE	FALSE	TRUE	FALSE	FALSE	TRUE	TRUE	5956.73
TCGA-2Y-A9HB-01	LIHC	0.617	TRUE	FALSE	TRUE	FALSE	FALSE	TRUE	TRUE	2535.2
TCGA-2Z-A9J1-01	KIRP	0.435	TRUE	FALSE	TRUE	FALSE	FALSE	TRUE	TRUE	3067.32
TCGA-2Z-A9J2-01	KIRP	0.377	TRUE	FALSE	TRUE	FALSE	FALSE	TRUE	TRUE	2326.69
TCGA-2Z-A9J3-01	KIRP	0.109	TRUE	FALSE	TRUE	FALSE	FALSE	TRUE	TRUE	12559.7
TCGA-2Z-A9J5-01	KIRP	0.504	TRUE	FALSE	TRUE	FALSE	FALSE	TRUE	TRUE	2806.63
TCGA-2Z-A9J6-01	KIRP	0.364	TRUE	FALSE	TRUE	FALSE	FALSE	TRUE	TRUE	4397.91
TCGA-2Z-A9J7-01	KIRP	0.083	TRUE	FALSE	TRUE	FALSE	FALSE	TRUE	TRUE	6931.39
TCGA-2Z-A9J8-01	KIRP	0.293	TRUE	FALSE	TRUE	FALSE	FALSE	TRUE	TRUE	1734.75
TCGA-2Z-A9J9-01	KIRP	0.309	TRUE	FALSE	TRUE	FALSE	FALSE	TRUE	TRUE	3.59714
TCGA-2Z-A9JD-01	KIRP	0.114	TRUE	FALSE	TRUE	FALSE	FALSE	TRUE	TRUE	1379.95
TCGA-2Z-A9JE-01	KIRP	0.12	TRUE	FALSE	TRUE	FALSE	FALSE	TRUE	TRUE	3994.94
TCGA-2Z-A9JG-01	KIRP	0.284	TRUE	FALSE	TRUE	FALSE	FALSE	TRUE	TRUE	5948.74
TCGA-2Z-A9JI-01	KIRP	0.368	TRUE	FALSE	TRUE	FALSE	FALSE	TRUE	TRUE	2045.93
TCGA-2Z-A9JJ-01	KIRP	0.351	TRUE	FALSE	TRUE	FALSE	FALSE	TRUE	TRUE	1093.38
TCGA-2Z-A9JK-01	KIRP	0.499	TRUE	FALSE	TRUE	FALSE	FALSE	TRUE	TRUE	571.793
TCGA-2Z-A9JL-01	KIRP	0.408	TRUE	FALSE	TRUE	FALSE	FALSE	TRUE	TRUE	1448.17
TCGA-2Z-A9JM-01	KIRP	0.361	TRUE	FALSE	TRUE	FALSE	FALSE	TRUE	TRUE	2582.97
TCGA-2Z-A9JN-01	KIRP	0.267	TRUE	FALSE	TRUE	FALSE	FALSE	TRUE	TRUE	4.41551
TCGA-2Z-A9JO-01	KIRP	0.186	TRUE	FALSE	TRUE	FALSE	FALSE	TRUE	TRUE	16.2144
TCGA-2Z-A9JP-01	KIRP	0.296	TRUE	FALSE	TRUE	FALSE	FALSE	TRUE	TRUE	2919.92
TCGA-2Z-A9JQ-01	KIRP	0.268	TRUE	FALSE	TRUE	FALSE	FALSE	TRUE	TRUE	4638.63
TCGA-2Z-A9JR-01	KIRP	0.374	TRUE	FALSE	TRUE	FALSE	FALSE	TRUE	TRUE	3466.13
TCGA-2Z-A9JS-01	KIRP	0.193	TRUE	FALSE	TRUE	FALSE	FALSE	TRUE	TRUE	2243.25
TCGA-2Z-A9JT-01	KIRP	0.463	TRUE	FALSE	TRUE	FALSE	FALSE	TRUE	TRUE	1708.05
TCGA-30-1718-01	OV	0.331	TRUE	FALSE	TRUE	FALSE	FALSE	TRUE	TRUE	8354.36
TCGA-30-1855-01	OV	0.462	TRUE	FALSE	TRUE	FALSE	FALSE	TRUE	TRUE	6489.5
TCGA-30-1860-01	OV	0.725	TRUE	FALSE	TRUE	FALSE	FALSE	TRUE	TRUE	11218.9
TCGA-30-1862-01	OV	0.268	TRUE	FALSE	TRUE	TRUE	FALSE	TRUE	TRUE	12648.2
TCGA-30-1891-01	OV	0.336	TRUE	FALSE	TRUE	TRUE	FALSE	TRUE	TRUE	10120.3
TCGA-31-1944-01	OV	0.232	TRUE	FALSE	TRUE	FALSE	FALSE	TRUE	TRUE	9740.31
TCGA-31-1950-01	OV	0.501	TRUE	FALSE	TRUE	FALSE	FALSE	TRUE	TRUE	2878.19
TCGA-31-1951-01	OV	0.482	TRUE	FALSE	TRUE	FALSE	FALSE	TRUE	TRUE	8771.17
TCGA-31-1953-01	OV	0.68	TRUE	FALSE	TRUE	TRUE	FALSE	TRUE	TRUE	6788.86
TCGA-31-1956-01	OV	0.809	TRUE	FALSE	TRUE	FALSE	FALSE	TRUE	TRUE	5905.75
TCGA-32-1970-01	GBM	0.137	TRUE	TRUE	TRUE	TRUE	FALSE	TRUE	TRUE	5786
TCGA-32-1980-01	GBM	0.208	TRUE	TRUE	TRUE	TRUE	FALSE	TRUE	TRUE	159.072
TCGA-32-1982-01	GBM	0.316	TRUE	TRUE	TRUE	TRUE	FALSE	TRUE	TRUE	1334.04
TCGA-32-2615-01	GBM	0.26	TRUE	TRUE	TRUE	TRUE	FALSE	TRUE	TRUE	4615.54
TCGA-32-2616-01	GBM	0.189	TRUE	TRUE	TRUE	FALSE	FALSE	TRUE	TRUE	6035.06
TCGA-32-2632-01	GBM	0.315	TRUE	TRUE	TRUE	TRUE	FALSE	TRUE	TRUE	5787.28
TCGA-32-2634-01	GBM	0.075	TRUE	TRUE	TRUE	TRUE	FALSE	TRUE	TRUE	4435.53
TCGA-32-2638-01	GBM	0.269	TRUE	TRUE	TRUE	TRUE	FALSE	TRUE	TRUE	4251.64
TCGA-32-4213-01	GBM	0.346	TRUE	TRUE	TRUE	TRUE	FALSE	TRUE	TRUE	1889.88
TCGA-32-5222-01	GBM	0.157	TRUE	TRUE	TRUE	TRUE	FALSE	TRUE	TRUE	3568.6
TCGA-33-4532-01	LUSC	0.156	TRUE	TRUE	TRUE	TRUE	FALSE	TRUE	TRUE	9847.63
TCGA-33-4533-01	LUSC	0.263	TRUE	TRUE	TRUE	TRUE	FALSE	TRUE	TRUE	10489.7
TCGA-33-4538-01	LUSC	0.275	TRUE	TRUE	TRUE	FALSE	FALSE	TRUE	TRUE	5555.01
TCGA-33-4547-01	LUSC	0.345	TRUE	TRUE	TRUE	TRUE	FALSE	TRUE	TRUE	3520.4
TCGA-33-4566-01	LUSC	0.727	TRUE	TRUE	TRUE	TRUE	FALSE	TRUE	TRUE	4054.95
TCGA-33-4579-01	LUSC	0.307	TRUE	FALSE	FALSE	FALSE	FALSE	TRUE	FALSE	NA
TCGA-33-4582-01	LUSC	0.186	TRUE	TRUE	TRUE	TRUE	FALSE	TRUE	TRUE	3464.3
TCGA-33-4583-01	LUSC	0.468	TRUE	TRUE	TRUE	TRUE	FALSE	TRUE	TRUE	2800.98
TCGA-33-4586-01	LUSC	0.14	TRUE	TRUE	TRUE	TRUE	FALSE	TRUE	TRUE	4131.15
TCGA-33-4587-01	LUSC	0.272	TRUE	FALSE	TRUE	FALSE	FALSE	TRUE	TRUE	7356.31
TCGA-33-4589-01	LUSC	0.802	TRUE	FALSE	TRUE	FALSE	FALSE	TRUE	TRUE	1056.44
TCGA-33-6737-01	LUSC	0.379	TRUE	TRUE	TRUE	TRUE	FALSE	TRUE	TRUE	2183.05
TCGA-33-6738-01	LUSC	0.28	TRUE	FALSE	TRUE	FALSE	FALSE	TRUE	TRUE	2235.41
TCGA-33-A4WN-01	LUSC	0.192	TRUE	FALSE	TRUE	FALSE	FALSE	FALSE	TRUE	2907.84
TCGA-33-A5GW-01	LUSC	0.104	TRUE	FALSE	TRUE	FALSE	FALSE	TRUE	TRUE	4583.88
TCGA-33-AAS8-01	LUSC	0.165	TRUE	FALSE	TRUE	FALSE	FALSE	TRUE	TRUE	5685.9
TCGA-33-AASB-01	LUSC	0.12	TRUE	FALSE	TRUE	FALSE	FALSE	TRUE	TRUE	3214.72
TCGA-33-AASD-01	LUSC	0.234	TRUE	FALSE	TRUE	FALSE	FALSE	TRUE	TRUE	8506.62
TCGA-33-AASI-01	LUSC	0.631	TRUE	FALSE	TRUE	FALSE	FALSE	TRUE	TRUE	2732.84
TCGA-33-AASJ-01	LUSC	0.261	TRUE	FALSE	TRUE	FALSE	FALSE	TRUE	TRUE	6966.82
TCGA-33-AASL-01	LUSC	0.401	TRUE	FALSE	TRUE	FALSE	FALSE	TRUE	TRUE	2247.3
TCGA-34-2596-01	LUSC	0.26	TRUE	TRUE	TRUE	TRUE	FALSE	TRUE	TRUE	9877.55
TCGA-34-2600-01	LUSC	0.254	TRUE	TRUE	TRUE	TRUE	FALSE	FALSE	TRUE	12656
TCGA-34-2608-01	LUSC	0.525	TRUE	TRUE	TRUE	TRUE	FALSE	TRUE	TRUE	614.7
TCGA-34-5231-01	LUSC	0.484	TRUE	TRUE	TRUE	TRUE	FALSE	TRUE	TRUE	6035.95
TCGA-34-5232-01	LUSC	0.726	TRUE	TRUE	TRUE	TRUE	FALSE	TRUE	TRUE	898.863
TCGA-34-5234-01	LUSC	0.761	TRUE	TRUE	TRUE	TRUE	FALSE	TRUE	TRUE	79.0368
TCGA-34-5236-01	LUSC	0.272	TRUE	TRUE	TRUE	TRUE	FALSE	TRUE	TRUE	1463.05
TCGA-34-5239-01	LUSC	0.64	TRUE	TRUE	TRUE	TRUE	FALSE	TRUE	TRUE	1661.31
TCGA-34-5240-01	LUSC	0.237	TRUE	TRUE	TRUE	TRUE	FALSE	FALSE	TRUE	13193.3
TCGA-34-5241-01	LUSC	0.627	TRUE	TRUE	TRUE	TRUE	FALSE	TRUE	TRUE	1925.78
TCGA-34-5927-01	LUSC	0.224	TRUE	TRUE	TRUE	TRUE	FALSE	TRUE	TRUE	4661.8
TCGA-34-5928-01	LUSC	0.506	TRUE	TRUE	TRUE	TRUE	FALSE	TRUE	TRUE	5641.44
TCGA-34-5929-01	LUSC	0.471	TRUE	TRUE	TRUE	TRUE	FALSE	TRUE	TRUE	3985.69
TCGA-34-7107-01	LUSC	0.362	TRUE	FALSE	TRUE	FALSE	FALSE	TRUE	TRUE	7402.09
TCGA-34-8454-01	LUSC	0.736	TRUE	FALSE	TRUE	FALSE	FALSE	TRUE	TRUE	1388.44
TCGA-34-8455-01	LUSC	0.374	TRUE	FALSE	TRUE	FALSE	FALSE	TRUE	TRUE	2632.89
TCGA-34-8456-01	LUSC	0.29	TRUE	FALSE	TRUE	FALSE	FALSE	FALSE	TRUE	5062.46
TCGA-34-A5IX-01	LUSC	0.319	TRUE	FALSE	TRUE	FALSE	FALSE	TRUE	TRUE	3076.79
TCGA-35-3615-01	LUAD	0.432	TRUE	TRUE	TRUE	TRUE	FALSE	FALSE	TRUE	2595.89
TCGA-35-4122-01	LUAD	0.796	TRUE	FALSE	TRUE	TRUE	FALSE	TRUE	TRUE	1852.55
TCGA-35-4123-01	LUAD	0.82	TRUE	FALSE	TRUE	TRUE	FALSE	TRUE	TRUE	1091.9
TCGA-35-5375-01	LUAD	0.583	TRUE	FALSE	TRUE	TRUE	FALSE	TRUE	TRUE	8613.11
TCGA-36-1568-01	OV	0.418	TRUE	TRUE	TRUE	TRUE	FALSE	TRUE	TRUE	7412.24
TCGA-36-1570-01	OV	0.289	TRUE	TRUE	TRUE	TRUE	FALSE	TRUE	TRUE	10028.7
TCGA-36-1571-01	OV	0.114	TRUE	TRUE	TRUE	TRUE	FALSE	TRUE	TRUE	14579.6
TCGA-36-1574-01	OV	0.407	TRUE	TRUE	TRUE	TRUE	FALSE	FALSE	TRUE	8685.59
TCGA-36-1575-01	OV	0.08	TRUE	TRUE	TRUE	TRUE	FALSE	TRUE	TRUE	10245.7
TCGA-36-1577-01	OV	0.095	TRUE	TRUE	TRUE	TRUE	FALSE	TRUE	TRUE	6263.64
TCGA-36-1578-01	OV	0.668	TRUE	TRUE	TRUE	TRUE	FALSE	TRUE	TRUE	14870.1
TCGA-36-1580-01	OV	0.466	TRUE	TRUE	TRUE	TRUE	FALSE	TRUE	TRUE	5087.55
TCGA-36-1581-01	OV	0.683	TRUE	FALSE	TRUE	FALSE	FALSE	FALSE	TRUE	8434.04
TCGA-37-3783-01	LUSC	0.792	TRUE	TRUE	TRUE	TRUE	FALSE	TRUE	TRUE	2944.22
TCGA-37-3789-01	LUSC	0.641	TRUE	TRUE	TRUE	TRUE	FALSE	TRUE	TRUE	4761.42
TCGA-37-3792-01	LUSC	0.775	TRUE	FALSE	TRUE	FALSE	FALSE	TRUE	TRUE	2627.98
TCGA-37-4129-01	LUSC	0.074	TRUE	FALSE	TRUE	FALSE	FALSE	TRUE	TRUE	725.076
TCGA-37-4130-01	LUSC	0.848	TRUE	FALSE	TRUE	FALSE	FALSE	TRUE	TRUE	5828.3
TCGA-37-4132-01	LUSC	0.69	TRUE	FALSE	TRUE	FALSE	FALSE	TRUE	TRUE	3733.12
TCGA-37-4133-01	LUSC	0.425	TRUE	TRUE	TRUE	TRUE	FALSE	TRUE	TRUE	9020.85
TCGA-37-4135-01	LUSC	0.436	TRUE	TRUE	TRUE	TRUE	FALSE	TRUE	TRUE	16977.2
TCGA-37-4141-01	LUSC	0.576	TRUE	TRUE	TRUE	TRUE	FALSE	TRUE	TRUE	4945.67
TCGA-37-5819-01	LUSC	0.349	TRUE	TRUE	TRUE	TRUE	FALSE	TRUE	TRUE	6869.07
TCGA-37-A5EL-01	LUSC	0.261	TRUE	FALSE	TRUE	FALSE	FALSE	TRUE	FALSE	15784
TCGA-37-A5EM-01	LUSC	0.483	TRUE	FALSE	FALSE	FALSE	FALSE	FALSE	FALSE	NA
TCGA-37-A5EN-01	LUSC	0.343	TRUE	FALSE	TRUE	FALSE	FALSE	TRUE	FALSE	9681.08
TCGA-38-4625-01	LUAD	0.672	TRUE	FALSE	TRUE	TRUE	FALSE	FALSE	TRUE	2293.95
TCGA-38-4626-01	LUAD	0.598	TRUE	TRUE	TRUE	TRUE	FALSE	TRUE	TRUE	151.555
TCGA-38-4627-01	LUAD	0.543	TRUE	TRUE	TRUE	TRUE	FALSE	TRUE	TRUE	382.461
TCGA-38-4628-01	LUAD	0.361	TRUE	TRUE	TRUE	TRUE	FALSE	TRUE	TRUE	6490.71
TCGA-38-4629-01	LUAD	0.702	TRUE	FALSE	TRUE	TRUE	FALSE	TRUE	TRUE	3948.7
TCGA-38-4630-01	LUAD	0.38	TRUE	FALSE	TRUE	TRUE	FALSE	TRUE	TRUE	8518.9
TCGA-38-4631-01	LUAD	0.52	TRUE	TRUE	TRUE	TRUE	FALSE	FALSE	TRUE	4480.74
TCGA-38-4632-01	LUAD	0.623	TRUE	TRUE	TRUE	TRUE	FALSE	FALSE	TRUE	4145.52
TCGA-38-6178-01	LUAD	0.47	TRUE	TRUE	TRUE	TRUE	FALSE	TRUE	TRUE	2589.97
TCGA-38-7271-01	LUAD	0.822	TRUE	FALSE	TRUE	FALSE	FALSE	TRUE	TRUE	205.074
TCGA-38-A44F-01	LUAD	0.73	TRUE	FALSE	TRUE	FALSE	FALSE	TRUE	TRUE	47.4159
TCGA-39-5011-01	LUSC	0.774	TRUE	FALSE	TRUE	FALSE	FALSE	TRUE	TRUE	2500.02
TCGA-39-5016-01	LUSC	0.536	TRUE	TRUE	TRUE	TRUE	FALSE	TRUE	TRUE	4218.21
TCGA-39-5019-01	LUSC	0.43	TRUE	TRUE	TRUE	TRUE	FALSE	TRUE	TRUE	5666.6
TCGA-39-5021-01	LUSC	0.446	TRUE	TRUE	TRUE	TRUE	FALSE	TRUE	TRUE	2429.43
TCGA-39-5022-01	LUSC	0.781	TRUE	TRUE	TRUE	TRUE	FALSE	TRUE	TRUE	389.594
TCGA-39-5024-01	LUSC	0.574	TRUE	TRUE	TRUE	TRUE	FALSE	TRUE	TRUE	1105.42
TCGA-39-5027-01	LUSC	0.15	TRUE	TRUE	TRUE	TRUE	FALSE	TRUE	TRUE	4123.21
TCGA-39-5028-01	LUSC	0.492	TRUE	TRUE	TRUE	TRUE	FALSE	TRUE	TRUE	667.167
TCGA-39-5029-01	LUSC	0.535	TRUE	TRUE	TRUE	TRUE	FALSE	FALSE	TRUE	2551.42
TCGA-39-5030-01	LUSC	0.834	TRUE	TRUE	TRUE	TRUE	FALSE	TRUE	TRUE	491.924
TCGA-39-5031-01	LUSC	0.542	TRUE	TRUE	TRUE	TRUE	FALSE	TRUE	TRUE	4266.91
TCGA-39-5034-01	LUSC	0.472	TRUE	FALSE	TRUE	FALSE	FALSE	TRUE	TRUE	5101.72
TCGA-39-5035-01	LUSC	0.776	TRUE	TRUE	TRUE	TRUE	FALSE	TRUE	TRUE	4777.04
TCGA-39-5036-01	LUSC	0.303	TRUE	TRUE	TRUE	TRUE	FALSE	TRUE	TRUE	3451.52
TCGA-39-5037-01	LUSC	0.099	TRUE	TRUE	TRUE	TRUE	FALSE	TRUE	TRUE	5901.29
TCGA-39-5039-01	LUSC	0.45	TRUE	TRUE	TRUE	TRUE	FALSE	TRUE	TRUE	545.087
TCGA-39-5040-01	LUSC	0.265	TRUE	FALSE	TRUE	FALSE	FALSE	TRUE	TRUE	2822.03
TCGA-3A-A9I5-01	PAAD	0.251	TRUE	TRUE	TRUE	FALSE	FALSE	TRUE	TRUE	1135.68
TCGA-3A-A9I7-01	PAAD	0.478	TRUE	TRUE	TRUE	FALSE	FALSE	TRUE	TRUE	52.0542
TCGA-3A-A9I9-01	PAAD	0.393	TRUE	TRUE	TRUE	FALSE	FALSE	TRUE	TRUE	924.79
TCGA-3A-A9IB-01	PAAD	0.44	TRUE	TRUE	TRUE	FALSE	FALSE	TRUE	TRUE	964.451
TCGA-3A-A9IC-01	PAAD	0.428	TRUE	TRUE	TRUE	FALSE	FALSE	TRUE	TRUE	1562.71
TCGA-3A-A9IH-01	PAAD	0.402	TRUE	TRUE	TRUE	FALSE	FALSE	TRUE	TRUE	937.483
TCGA-3A-A9IJ-01	PAAD	0.052	TRUE	FALSE	TRUE	FALSE	FALSE	FALSE	TRUE	24.8201
TCGA-3A-A9IL-01	PAAD	0.19	TRUE	FALSE	TRUE	FALSE	FALSE	TRUE	TRUE	4969.18
TCGA-3A-A9IN-01	PAAD	0.245	TRUE	FALSE	TRUE	FALSE	FALSE	TRUE	TRUE	8977.53
TCGA-3A-A9IO-01	PAAD	0.12	TRUE	FALSE	TRUE	FALSE	FALSE	TRUE	TRUE	4272.95
TCGA-3A-A9IR-01	PAAD	0.107	TRUE	FALSE	TRUE	FALSE	FALSE	TRUE	TRUE	592.581
TCGA-3A-A9IS-01	PAAD	0.049	TRUE	FALSE	TRUE	FALSE	FALSE	TRUE	TRUE	5538.65
TCGA-3A-A9IU-01	PAAD	0.368	TRUE	TRUE	TRUE	FALSE	FALSE	TRUE	TRUE	1809.42
TCGA-3A-A9IV-01	PAAD	0.078	TRUE	FALSE	TRUE	FALSE	FALSE	FALSE	TRUE	18814.2
TCGA-3A-A9IX-01	PAAD	0.516	TRUE	TRUE	TRUE	FALSE	FALSE	TRUE	TRUE	43.8813
TCGA-3A-A9IZ-01	PAAD	0.264	TRUE	TRUE	TRUE	FALSE	FALSE	TRUE	TRUE	2345.57
TCGA-3A-A9J0-01	PAAD	0.378	TRUE	TRUE	TRUE	FALSE	FALSE	TRUE	TRUE	3291.45
TCGA-3B-A9HI-01	SARC	0.565	TRUE	TRUE	TRUE	FALSE	FALSE	TRUE	FALSE	4771.63
TCGA-3B-A9HJ-01	SARC	0.847	TRUE	TRUE	TRUE	FALSE	FALSE	TRUE	TRUE	234.84
TCGA-3B-A9HL-01	SARC	0.243	TRUE	TRUE	TRUE	FALSE	FALSE	TRUE	TRUE	7336.11
TCGA-3B-A9HO-01	SARC	0.796	TRUE	TRUE	TRUE	FALSE	FALSE	TRUE	FALSE	5472.7
TCGA-3B-A9HP-01	SARC	0.426	TRUE	TRUE	TRUE	FALSE	FALSE	TRUE	TRUE	2541.97
TCGA-3B-A9HQ-01	SARC	0.692	TRUE	TRUE	TRUE	FALSE	FALSE	TRUE	TRUE	4285.57
TCGA-3B-A9HR-01	SARC	0.067	TRUE	TRUE	TRUE	FALSE	FALSE	TRUE	TRUE	10679.8
TCGA-3B-A9HS-01	SARC	0.615	TRUE	TRUE	TRUE	FALSE	FALSE	TRUE	TRUE	7239.46
TCGA-3B-A9HT-01	SARC	0.81	TRUE	TRUE	TRUE	FALSE	FALSE	FALSE	TRUE	427.871
TCGA-3B-A9HU-01	SARC	0.767	TRUE	TRUE	TRUE	FALSE	FALSE	TRUE	TRUE	2121.24
TCGA-3B-A9HV-01	SARC	0.074	TRUE	TRUE	TRUE	FALSE	FALSE	TRUE	FALSE	3762.52
TCGA-3B-A9HX-01	SARC	0.431	TRUE	TRUE	TRUE	FALSE	FALSE	TRUE	TRUE	5117.82
TCGA-3B-A9HY-01	SARC	0.335	TRUE	TRUE	TRUE	FALSE	FALSE	TRUE	TRUE	4103.26
TCGA-3B-A9HZ-01	SARC	0.457	TRUE	TRUE	TRUE	FALSE	FALSE	TRUE	TRUE	2238.75
TCGA-3B-A9I0-01	SARC	0.595	TRUE	TRUE	TRUE	FALSE	FALSE	TRUE	TRUE	2896.54
TCGA-3B-A9I1-01	SARC	0.201	TRUE	TRUE	TRUE	FALSE	FALSE	TRUE	TRUE	6703.84
TCGA-3B-A9I3-01	SARC	0.332	TRUE	TRUE	TRUE	FALSE	FALSE	TRUE	TRUE	868.282
TCGA-3C-AAAU-01	BRCA	0.096	TRUE	FALSE	TRUE	FALSE	FALSE	TRUE	TRUE	7880.95
TCGA-3C-AALI-01	BRCA	0.516	TRUE	FALSE	TRUE	FALSE	FALSE	TRUE	TRUE	8925.08
TCGA-3C-AALJ-01	BRCA	0.456	TRUE	FALSE	TRUE	FALSE	FALSE	TRUE	TRUE	7533.21
TCGA-3C-AALK-01	BRCA	0.292	TRUE	FALSE	TRUE	FALSE	FALSE	TRUE	TRUE	3182.71
TCGA-3E-AAAY-01	PAAD	0.572	TRUE	TRUE	TRUE	FALSE	FALSE	TRUE	TRUE	44.5375
TCGA-3E-AAAZ-01	PAAD	0.23	TRUE	TRUE	TRUE	FALSE	FALSE	TRUE	TRUE	801.137
TCGA-3G-AB0O-01	THYM	0.669	TRUE	TRUE	TRUE	FALSE	FALSE	TRUE	TRUE	5.5674
TCGA-3G-AB0Q-01	THYM	0.456	TRUE	TRUE	TRUE	FALSE	FALSE	TRUE	TRUE	55.2347
TCGA-3G-AB0T-01	THYM	0.664	TRUE	TRUE	TRUE	FALSE	FALSE	TRUE	TRUE	275.633
TCGA-3G-AB14-01	THYM	0.608	TRUE	TRUE	TRUE	FALSE	FALSE	TRUE	TRUE	544.067
TCGA-3G-AB19-01	THYM	0.739	TRUE	TRUE	TRUE	FALSE	FALSE	TRUE	TRUE	354.388
TCGA-3H-AB3K-01	MESO	0.41	TRUE	TRUE	TRUE	FALSE	FALSE	TRUE	TRUE	1468.36
TCGA-3H-AB3L-01	MESO	0.434	TRUE	TRUE	TRUE	FALSE	FALSE	TRUE	TRUE	2289.48
TCGA-3H-AB3M-01	MESO	0.34	TRUE	TRUE	TRUE	FALSE	FALSE	FALSE	TRUE	4841.34
TCGA-3H-AB3O-01	MESO	0.93	TRUE	TRUE	TRUE	FALSE	FALSE	TRUE	TRUE	19.305
TCGA-3H-AB3S-01	MESO	0.192	TRUE	TRUE	TRUE	FALSE	FALSE	TRUE	TRUE	1640.26
TCGA-3H-AB3T-01	MESO	0.738	TRUE	TRUE	TRUE	FALSE	FALSE	FALSE	TRUE	990.204
TCGA-3H-AB3U-01	MESO	0.33	TRUE	TRUE	TRUE	FALSE	FALSE	TRUE	TRUE	6372.07
TCGA-3H-AB3X-01	MESO	0.48	TRUE	TRUE	TRUE	FALSE	FALSE	TRUE	TRUE	5070.53
TCGA-3K-AAZ8-01	LIHC	0.557	TRUE	FALSE	TRUE	FALSE	FALSE	TRUE	TRUE	3410.49
TCGA-3L-AA1B-01	COAD	0.32	TRUE	FALSE	TRUE	FALSE	TRUE	TRUE	TRUE	1886.65
TCGA-3M-AB46-01	STAD	0.321	TRUE	FALSE	TRUE	FALSE	TRUE	TRUE	FALSE	6183.87
TCGA-3M-AB47-01	STAD	0.46	TRUE	FALSE	TRUE	FALSE	TRUE	TRUE	FALSE	576.701
TCGA-3N-A9WB-06	SKCM	0.043	TRUE	FALSE	TRUE	FALSE	FALSE	TRUE	TRUE	10001.5
TCGA-3N-A9WC-06	SKCM	0.719	TRUE	FALSE	TRUE	FALSE	FALSE	TRUE	TRUE	5379.12
TCGA-3N-A9WD-06	SKCM	0.516	TRUE	FALSE	TRUE	FALSE	FALSE	TRUE	TRUE	1151.2
TCGA-3Q-A9WF-01	THYM	0.783	TRUE	TRUE	TRUE	FALSE	FALSE	TRUE	TRUE	10.7029
TCGA-3R-A8YX-01	SARC	0.246	TRUE	TRUE	TRUE	FALSE	FALSE	TRUE	TRUE	6824.05
TCGA-3S-A8YW-01	THYM	0.595	TRUE	TRUE	TRUE	FALSE	FALSE	TRUE	TRUE	5394.17
TCGA-3S-AAYX-01	THYM	0.766	TRUE	TRUE	TRUE	FALSE	FALSE	TRUE	TRUE	6.44651
TCGA-3T-AA9L-01	THYM	0.76	TRUE	TRUE	TRUE	FALSE	FALSE	TRUE	TRUE	2.30068
TCGA-3U-A98D-01	MESO	0.34	TRUE	TRUE	TRUE	FALSE	FALSE	TRUE	FALSE	2500.88
TCGA-3U-A98E-01	MESO	0.749	TRUE	TRUE	TRUE	FALSE	FALSE	TRUE	FALSE	2037.14
TCGA-3U-A98F-01	MESO	0.175	TRUE	TRUE	TRUE	FALSE	FALSE	TRUE	FALSE	5810.95
TCGA-3U-A98G-01	MESO	0.52	TRUE	TRUE	TRUE	FALSE	FALSE	TRUE	FALSE	1.97091
TCGA-3U-A98H-01	MESO	0.571	TRUE	TRUE	TRUE	FALSE	FALSE	TRUE	FALSE	352.276
TCGA-3U-A98I-01	MESO	0.36	TRUE	TRUE	TRUE	FALSE	FALSE	TRUE	FALSE	2191.48
TCGA-3U-A98J-01	MESO	0.534	TRUE	TRUE	TRUE	FALSE	FALSE	TRUE	FALSE	1404.55
TCGA-3X-AAV9-01	CHOL	0.612	TRUE	TRUE	TRUE	FALSE	FALSE	TRUE	TRUE	246.279
TCGA-3X-AAVA-01	CHOL	0.325	TRUE	TRUE	TRUE	FALSE	FALSE	TRUE	TRUE	2359.79
TCGA-3X-AAVB-01	CHOL	0.464	TRUE	TRUE	TRUE	FALSE	FALSE	TRUE	TRUE	2020.49
TCGA-3X-AAVC-01	CHOL	0.639	TRUE	TRUE	TRUE	FALSE	FALSE	TRUE	TRUE	5969.52
TCGA-3X-AAVE-01	CHOL	0.665	TRUE	TRUE	TRUE	FALSE	FALSE	TRUE	TRUE	1137.73
TCGA-3Z-A93Z-01	KIRC	0.538	TRUE	FALSE	TRUE	FALSE	FALSE	FALSE	TRUE	784.581
TCGA-41-2571-01	GBM	0.053	TRUE	TRUE	TRUE	TRUE	FALSE	TRUE	TRUE	6488.41
TCGA-41-2572-01	GBM	0.209	TRUE	TRUE	TRUE	TRUE	FALSE	TRUE	TRUE	3910.22
TCGA-41-3915-01	GBM	0.186	TRUE	TRUE	TRUE	TRUE	FALSE	TRUE	TRUE	2349.64
TCGA-41-4097-01	GBM	0.205	TRUE	TRUE	TRUE	TRUE	FALSE	TRUE	TRUE	1158.7
TCGA-41-5651-01	GBM	0.076	TRUE	TRUE	TRUE	TRUE	FALSE	TRUE	TRUE	6173.69
TCGA-43-2576-01	LUSC	0.623	TRUE	FALSE	TRUE	FALSE	FALSE	FALSE	TRUE	2033.08
TCGA-43-2578-01	LUSC	0.457	TRUE	TRUE	TRUE	TRUE	FALSE	TRUE	TRUE	5012.3
TCGA-43-2581-01	LUSC	0.632	TRUE	FALSE	TRUE	FALSE	FALSE	TRUE	TRUE	2031.99
TCGA-43-3394-01	LUSC	0.201	TRUE	TRUE	TRUE	TRUE	FALSE	TRUE	TRUE	11664.4
TCGA-43-3920-01	LUSC	0.475	TRUE	TRUE	TRUE	TRUE	FALSE	TRUE	TRUE	7775.67
TCGA-43-5668-01	LUSC	0.625	TRUE	TRUE	TRUE	TRUE	FALSE	TRUE	TRUE	3321.4
TCGA-43-5670-01	LUSC	0.178	TRUE	FALSE	TRUE	FALSE	FALSE	TRUE	TRUE	10239.9
TCGA-43-6143-01	LUSC	0.26	TRUE	TRUE	TRUE	TRUE	FALSE	TRUE	TRUE	9507.12
TCGA-43-6647-01	LUSC	0.575	TRUE	TRUE	TRUE	TRUE	FALSE	FALSE	TRUE	555.802
TCGA-43-6770-01	LUSC	0.258	TRUE	TRUE	TRUE	TRUE	FALSE	TRUE	TRUE	4922.72
TCGA-43-6771-01	LUSC	0.517	TRUE	TRUE	TRUE	TRUE	FALSE	TRUE	TRUE	2199.03
TCGA-43-6773-01	LUSC	0.635	TRUE	FALSE	TRUE	FALSE	FALSE	TRUE	TRUE	102.25
TCGA-43-7656-01	LUSC	0.555	TRUE	FALSE	TRUE	FALSE	FALSE	TRUE	TRUE	3996.13
TCGA-43-7657-01	LUSC	0.167	TRUE	FALSE	TRUE	FALSE	FALSE	TRUE	TRUE	10997
TCGA-43-7658-01	LUSC	0.542	TRUE	FALSE	TRUE	FALSE	FALSE	TRUE	TRUE	12657.7
TCGA-43-8115-01	LUSC	0.653	TRUE	FALSE	TRUE	FALSE	FALSE	TRUE	TRUE	3508.78
TCGA-43-8116-01	LUSC	0.524	TRUE	FALSE	TRUE	FALSE	FALSE	TRUE	TRUE	3317.36
TCGA-43-8118-01	LUSC	0.423	TRUE	FALSE	TRUE	FALSE	FALSE	TRUE	TRUE	2678.26
TCGA-43-A474-01	LUSC	0.078	TRUE	FALSE	TRUE	FALSE	FALSE	TRUE	TRUE	4150
TCGA-43-A475-01	LUSC	0.785	TRUE	FALSE	TRUE	FALSE	FALSE	TRUE	TRUE	2524.76
TCGA-43-A56U-01	LUSC	0.789	TRUE	FALSE	TRUE	FALSE	FALSE	FALSE	TRUE	257.213
TCGA-43-A56V-01	LUSC	0.258	TRUE	FALSE	TRUE	FALSE	FALSE	TRUE	TRUE	6882.73
TCGA-44-2655-01	LUAD	0.569	TRUE	TRUE	TRUE	TRUE	FALSE	TRUE	TRUE	667.364
TCGA-44-2656-01	LUAD	0.786	TRUE	TRUE	TRUE	TRUE	FALSE	TRUE	TRUE	1491.11
TCGA-44-2657-01	LUAD	0.816	TRUE	TRUE	TRUE	TRUE	FALSE	TRUE	TRUE	869.747
TCGA-44-2659-01	LUAD	0.712	TRUE	TRUE	TRUE	TRUE	FALSE	TRUE	TRUE	6909.41
TCGA-44-2661-01	LUAD	0.809	TRUE	TRUE	TRUE	TRUE	FALSE	TRUE	TRUE	246.734
TCGA-44-2662-01	LUAD	0.493	TRUE	TRUE	TRUE	TRUE	FALSE	TRUE	TRUE	2906.8
TCGA-44-2665-01	LUAD	0.543	TRUE	TRUE	TRUE	TRUE	FALSE	TRUE	TRUE	3046.71
TCGA-44-2666-01	LUAD	0.329	TRUE	TRUE	TRUE	TRUE	FALSE	TRUE	TRUE	612.518
TCGA-44-2668-01	LUAD	0.781	TRUE	FALSE	TRUE	TRUE	FALSE	TRUE	TRUE	830.101
TCGA-44-3396-01	LUAD	0.743	TRUE	TRUE	TRUE	TRUE	FALSE	TRUE	TRUE	386.423
TCGA-44-3398-01	LUAD	0.654	TRUE	FALSE	TRUE	TRUE	FALSE	TRUE	TRUE	118.066
TCGA-44-3918-01	LUAD	0.807	TRUE	FALSE	TRUE	TRUE	FALSE	TRUE	TRUE	2374.31
TCGA-44-3919-01	LUAD	0.711	TRUE	TRUE	TRUE	TRUE	FALSE	TRUE	TRUE	1275.09
TCGA-44-4112-01	LUAD	0.426	TRUE	TRUE	TRUE	TRUE	FALSE	TRUE	TRUE	2333.68
TCGA-44-5643-01	LUAD	0.44	TRUE	FALSE	TRUE	TRUE	FALSE	TRUE	TRUE	5108.86
TCGA-44-5644-01	LUAD	0.25	TRUE	FALSE	TRUE	FALSE	FALSE	TRUE	TRUE	8874.05
TCGA-44-5645-01	LUAD	0.626	TRUE	TRUE	TRUE	TRUE	FALSE	TRUE	TRUE	3554.67
TCGA-44-6145-01	LUAD	0.82	TRUE	TRUE	TRUE	TRUE	FALSE	TRUE	TRUE	452.739
TCGA-44-6146-01	LUAD	0.332	TRUE	TRUE	TRUE	TRUE	FALSE	TRUE	TRUE	1788.33
TCGA-44-6147-01	LUAD	0.571	TRUE	TRUE	TRUE	TRUE	FALSE	TRUE	TRUE	2872.4
TCGA-44-6148-01	LUAD	0.368	TRUE	FALSE	TRUE	TRUE	FALSE	TRUE	TRUE	503.121
TCGA-44-6774-01	LUAD	0.47	TRUE	TRUE	TRUE	TRUE	FALSE	TRUE	TRUE	2395.21
TCGA-44-6775-01	LUAD	0.56	TRUE	TRUE	TRUE	TRUE	FALSE	TRUE	TRUE	1870.9
TCGA-44-6776-01	LUAD	0.307	TRUE	TRUE	TRUE	TRUE	FALSE	TRUE	TRUE	2014.4
TCGA-44-6777-01	LUAD	0.664	TRUE	TRUE	TRUE	TRUE	FALSE	TRUE	TRUE	1899.81
TCGA-44-6778-01	LUAD	0.748	TRUE	FALSE	TRUE	TRUE	FALSE	TRUE	TRUE	2542.36
TCGA-44-6779-01	LUAD	0.826	TRUE	TRUE	TRUE	TRUE	FALSE	TRUE	TRUE	2847.49
TCGA-44-7659-01	LUAD	0.498	TRUE	TRUE	TRUE	FALSE	FALSE	TRUE	TRUE	1956.61
TCGA-44-7660-01	LUAD	0.339	TRUE	FALSE	TRUE	FALSE	FALSE	FALSE	TRUE	6995.33
TCGA-44-7661-01	LUAD	0.659	TRUE	FALSE	TRUE	FALSE	FALSE	TRUE	TRUE	313.446
TCGA-44-7662-01	LUAD	0.61	TRUE	TRUE	TRUE	FALSE	FALSE	TRUE	TRUE	2733.02
TCGA-44-7667-01	LUAD	0.265	TRUE	FALSE	TRUE	FALSE	FALSE	TRUE	TRUE	4463.5
TCGA-44-7669-01	LUAD	0.504	TRUE	FALSE	TRUE	FALSE	FALSE	TRUE	TRUE	4807.92
TCGA-44-7670-01	LUAD	0.451	TRUE	TRUE	TRUE	FALSE	FALSE	TRUE	TRUE	14405.9
TCGA-44-7671-01	LUAD	0.185	TRUE	TRUE	TRUE	FALSE	FALSE	TRUE	TRUE	1939.87
TCGA-44-7672-01	LUAD	0.775	TRUE	TRUE	TRUE	FALSE	FALSE	TRUE	TRUE	1400.67
TCGA-44-8117-01	LUAD	0.404	TRUE	FALSE	TRUE	FALSE	FALSE	TRUE	TRUE	5473.32
TCGA-44-8119-01	LUAD	0.42	TRUE	FALSE	TRUE	FALSE	FALSE	FALSE	TRUE	6001.58
TCGA-44-8120-01	LUAD	0.366	TRUE	FALSE	TRUE	FALSE	FALSE	TRUE	TRUE	2036.63
TCGA-44-A479-01	LUAD	0.75	TRUE	FALSE	TRUE	FALSE	FALSE	TRUE	TRUE	650.336
TCGA-44-A47A-01	LUAD	0.646	TRUE	FALSE	TRUE	FALSE	FALSE	TRUE	TRUE	2858.54
TCGA-44-A47B-01	LUAD	0.424	TRUE	FALSE	TRUE	FALSE	FALSE	TRUE	TRUE	2507.79
TCGA-44-A47G-01	LUAD	0.769	TRUE	FALSE	TRUE	FALSE	FALSE	TRUE	TRUE	103.394
TCGA-44-A4SS-01	LUAD	0.708	TRUE	FALSE	TRUE	FALSE	FALSE	TRUE	TRUE	911.154
TCGA-44-A4SU-01	LUAD	0.5	TRUE	FALSE	TRUE	FALSE	FALSE	TRUE	TRUE	2449.9
TCGA-46-3765-01	LUSC	0.416	TRUE	TRUE	TRUE	TRUE	FALSE	TRUE	FALSE	6173.52
TCGA-46-3766-01	LUSC	0.725	TRUE	TRUE	TRUE	TRUE	FALSE	TRUE	FALSE	439.631
TCGA-46-3767-01	LUSC	0.56	TRUE	TRUE	TRUE	TRUE	FALSE	TRUE	FALSE	593.741
TCGA-46-3768-01	LUSC	0.179	TRUE	TRUE	TRUE	TRUE	FALSE	TRUE	TRUE	7587.75
TCGA-46-3769-01	LUSC	0.63	TRUE	TRUE	TRUE	TRUE	FALSE	TRUE	FALSE	7379.81
TCGA-46-6025-01	LUSC	0.229	TRUE	TRUE	TRUE	TRUE	FALSE	TRUE	TRUE	6565.44
TCGA-46-6026-01	LUSC	0.195	TRUE	TRUE	TRUE	TRUE	FALSE	TRUE	TRUE	8966.48
TCGA-49-4486-01	LUAD	0.292	TRUE	TRUE	TRUE	TRUE	FALSE	TRUE	TRUE	3036.46
TCGA-49-4487-01	LUAD	0.719	TRUE	TRUE	TRUE	TRUE	FALSE	TRUE	TRUE	1076.97
TCGA-49-4488-01	LUAD	0.643	TRUE	TRUE	TRUE	TRUE	FALSE	TRUE	TRUE	8297.06
TCGA-49-4490-01	LUAD	0.453	TRUE	TRUE	TRUE	TRUE	FALSE	TRUE	TRUE	2221.02
TCGA-49-4494-01	LUAD	0.512	TRUE	TRUE	TRUE	TRUE	FALSE	TRUE	TRUE	1907.4
TCGA-49-4501-01	LUAD	0.613	TRUE	TRUE	TRUE	TRUE	FALSE	TRUE	TRUE	2917.35
TCGA-49-4505-01	LUAD	0.689	TRUE	TRUE	TRUE	TRUE	FALSE	TRUE	TRUE	2535.94
TCGA-49-4506-01	LUAD	0.69	TRUE	TRUE	TRUE	TRUE	FALSE	TRUE	TRUE	704.641
TCGA-49-4507-01	LUAD	0.745	TRUE	TRUE	TRUE	TRUE	FALSE	TRUE	TRUE	3524.78
TCGA-49-4510-01	LUAD	0.434	TRUE	TRUE	TRUE	TRUE	FALSE	TRUE	TRUE	3576.74
TCGA-49-4512-01	LUAD	0.419	TRUE	TRUE	TRUE	TRUE	FALSE	FALSE	TRUE	3816.44
TCGA-49-4514-01	LUAD	0.523	TRUE	TRUE	TRUE	TRUE	FALSE	TRUE	TRUE	1024.47
TCGA-49-6742-01	LUAD	0.328	TRUE	TRUE	TRUE	TRUE	FALSE	TRUE	TRUE	2022.99
TCGA-49-6743-01	LUAD	0.477	TRUE	FALSE	TRUE	TRUE	FALSE	TRUE	TRUE	1298.5
TCGA-49-6744-01	LUAD	0.73	TRUE	TRUE	TRUE	TRUE	FALSE	TRUE	TRUE	641.588
TCGA-49-6745-01	LUAD	0.619	TRUE	TRUE	TRUE	TRUE	FALSE	TRUE	TRUE	1390.48
TCGA-49-6761-01	LUAD	0.598	TRUE	TRUE	TRUE	FALSE	FALSE	TRUE	TRUE	1779.24
TCGA-49-6767-01	LUAD	0.681	TRUE	TRUE	TRUE	TRUE	FALSE	TRUE	TRUE	5067.09
TCGA-49-AAQV-01	LUAD	0.569	TRUE	FALSE	TRUE	FALSE	FALSE	TRUE	TRUE	729.454
TCGA-49-AAR0-01	LUAD	0.511	TRUE	FALSE	TRUE	FALSE	FALSE	TRUE	TRUE	2104.13
TCGA-49-AAR2-01	LUAD	0.579	TRUE	FALSE	TRUE	FALSE	FALSE	TRUE	TRUE	2497.75
TCGA-49-AAR3-01	LUAD	0.789	TRUE	FALSE	TRUE	FALSE	FALSE	TRUE	TRUE	352.508
TCGA-49-AAR4-01	LUAD	0.704	TRUE	FALSE	TRUE	FALSE	FALSE	TRUE	TRUE	262.877
TCGA-49-AAR9-01	LUAD	0.297	TRUE	FALSE	TRUE	FALSE	FALSE	TRUE	TRUE	6975.38
TCGA-49-AARE-01	LUAD	0.428	TRUE	FALSE	TRUE	FALSE	FALSE	TRUE	TRUE	3068.57
TCGA-49-AARN-01	LUAD	0.498	TRUE	FALSE	TRUE	FALSE	FALSE	TRUE	TRUE	860.019
TCGA-49-AARO-01	LUAD	0.717	TRUE	FALSE	TRUE	FALSE	FALSE	TRUE	TRUE	1917.1
TCGA-49-AARQ-01	LUAD	0.627	TRUE	FALSE	TRUE	FALSE	FALSE	TRUE	TRUE	3843.08
TCGA-49-AARR-01	LUAD	0.516	TRUE	FALSE	TRUE	FALSE	FALSE	TRUE	TRUE	8.04387
TCGA-4A-A93W-01	KIRP	0.258	TRUE	FALSE	TRUE	FALSE	FALSE	TRUE	FALSE	2407.63
TCGA-4A-A93X-01	KIRP	0.11	TRUE	FALSE	TRUE	FALSE	FALSE	TRUE	FALSE	4394.7
TCGA-4A-A93Y-01	KIRP	0.692	TRUE	FALSE	TRUE	FALSE	FALSE	TRUE	FALSE	24.1504
TCGA-4B-A93V-01	LUAD	0.452	TRUE	FALSE	TRUE	FALSE	FALSE	TRUE	TRUE	9951.48
TCGA-4C-A93U-01	THCA	0.673	TRUE	TRUE	TRUE	FALSE	FALSE	TRUE	TRUE	2431.87
TCGA-4E-A92E-01	UCEC	0.597	TRUE	FALSE	TRUE	FALSE	TRUE	TRUE	FALSE	826.355
TCGA-4G-AAZO-01	CHOL	0.392	TRUE	TRUE	TRUE	FALSE	FALSE	TRUE	TRUE	3356.59
TCGA-4G-AAZT-01	CHOL	0.341	TRUE	TRUE	TRUE	FALSE	FALSE	TRUE	TRUE	2527.03
TCGA-4H-AAAK-01	BRCA	0.243	TRUE	FALSE	TRUE	FALSE	FALSE	TRUE	TRUE	2725.52
TCGA-4J-AA1J-01	CESC	0.323	TRUE	FALSE	TRUE	FALSE	FALSE	TRUE	TRUE	4849.04
TCGA-4K-AA1G-01	TGCT	0.364	TRUE	TRUE	TRUE	FALSE	FALSE	TRUE	TRUE	3671.85
TCGA-4K-AA1H-01	TGCT	0.881	TRUE	TRUE	TRUE	FALSE	FALSE	TRUE	TRUE	105.638
TCGA-4K-AA1I-01	TGCT	0.814	TRUE	TRUE	TRUE	FALSE	FALSE	TRUE	TRUE	539.801
TCGA-4K-AAAL-01	TGCT	0.499	TRUE	TRUE	TRUE	FALSE	FALSE	TRUE	TRUE	3838.53
TCGA-4L-AA1F-01	PRAD	0.444	TRUE	FALSE	TRUE	FALSE	FALSE	TRUE	TRUE	766.563
TCGA-4N-A93T-01	COAD	0.223	TRUE	FALSE	TRUE	FALSE	TRUE	FALSE	TRUE	5947.92
TCGA-4P-AA8J-01	HNSC	0.548	TRUE	FALSE	TRUE	FALSE	FALSE	TRUE	TRUE	2206.06
TCGA-4R-AA8I-01	LIHC	0.405	TRUE	FALSE	TRUE	FALSE	FALSE	FALSE	TRUE	2938.61
TCGA-4T-AA8H-01	COAD	0.199	TRUE	FALSE	TRUE	FALSE	FALSE	TRUE	TRUE	4966.06
TCGA-4V-A9QI-01	THYM	0.592	TRUE	TRUE	TRUE	FALSE	FALSE	TRUE	TRUE	38.6099
TCGA-4V-A9QJ-01	THYM	0.73	TRUE	TRUE	TRUE	FALSE	FALSE	TRUE	TRUE	244.554
TCGA-4V-A9QL-01	THYM	0.702	TRUE	TRUE	TRUE	FALSE	FALSE	TRUE	TRUE	41.6749
TCGA-4V-A9QM-01	THYM	0.609	TRUE	TRUE	TRUE	FALSE	FALSE	FALSE	TRUE	12.9709
TCGA-4V-A9QN-01	THYM	0.51	TRUE	TRUE	TRUE	FALSE	FALSE	TRUE	TRUE	5090.11
TCGA-4V-A9QR-01	THYM	0.661	TRUE	TRUE	TRUE	FALSE	FALSE	TRUE	TRUE	1051.78
TCGA-4V-A9QS-01	THYM	0.614	TRUE	TRUE	TRUE	FALSE	FALSE	TRUE	TRUE	733.724
TCGA-4V-A9QT-01	THYM	0.776	TRUE	TRUE	TRUE	FALSE	FALSE	TRUE	TRUE	3.67636
TCGA-4V-A9QU-01	THYM	0.515	TRUE	TRUE	TRUE	FALSE	FALSE	TRUE	TRUE	1.55518
TCGA-4V-A9QW-01	THYM	0.583	TRUE	TRUE	TRUE	FALSE	FALSE	TRUE	TRUE	14.7739
TCGA-4V-A9QX-01	THYM	0.611	TRUE	TRUE	TRUE	FALSE	FALSE	TRUE	TRUE	39.7844
TCGA-4X-A9F9-01	THYM	0.805	TRUE	TRUE	TRUE	FALSE	FALSE	TRUE	TRUE	7.71153
TCGA-4X-A9FA-01	THYM	0.569	TRUE	TRUE	TRUE	FALSE	FALSE	TRUE	TRUE	8.40206
TCGA-4X-A9FB-01	THYM	0.786	TRUE	TRUE	TRUE	FALSE	FALSE	TRUE	TRUE	24.7007
TCGA-4X-A9FC-01	THYM	0.616	TRUE	TRUE	TRUE	FALSE	FALSE	TRUE	TRUE	2.75342
TCGA-4X-A9FD-01	THYM	0.589	TRUE	TRUE	TRUE	FALSE	FALSE	TRUE	TRUE	1236.18
TCGA-4Z-AA7M-01	BLCA	0.14	TRUE	FALSE	TRUE	FALSE	FALSE	TRUE	TRUE	8199.6
TCGA-4Z-AA7N-01	BLCA	0.651	TRUE	FALSE	TRUE	FALSE	FALSE	TRUE	TRUE	61.9572
TCGA-4Z-AA7O-01	BLCA	0.53	TRUE	FALSE	TRUE	FALSE	FALSE	FALSE	TRUE	2705.84
TCGA-4Z-AA7Q-01	BLCA	0.698	TRUE	FALSE	TRUE	FALSE	FALSE	TRUE	TRUE	1574.87
TCGA-4Z-AA7R-01	BLCA	0.126	TRUE	FALSE	TRUE	FALSE	FALSE	TRUE	TRUE	8861.98
TCGA-4Z-AA7S-01	BLCA	0.08	TRUE	FALSE	TRUE	FALSE	FALSE	TRUE	TRUE	3543
TCGA-4Z-AA7W-01	BLCA	0.892	TRUE	FALSE	TRUE	FALSE	FALSE	TRUE	TRUE	1585.86
TCGA-4Z-AA7Y-01	BLCA	0.127	TRUE	FALSE	TRUE	FALSE	FALSE	FALSE	TRUE	3051.76
TCGA-4Z-AA80-01	BLCA	0.247	TRUE	FALSE	TRUE	FALSE	FALSE	TRUE	TRUE	6063.08
TCGA-4Z-AA81-01	BLCA	0.653	TRUE	FALSE	TRUE	FALSE	FALSE	TRUE	TRUE	5257.69
TCGA-4Z-AA82-01	BLCA	0.253	TRUE	FALSE	TRUE	FALSE	FALSE	TRUE	TRUE	3479.38
TCGA-4Z-AA83-01	BLCA	0.357	TRUE	FALSE	TRUE	FALSE	FALSE	FALSE	TRUE	1301.06
TCGA-4Z-AA84-01	BLCA	0.129	TRUE	FALSE	TRUE	FALSE	FALSE	TRUE	FALSE	5276.53
TCGA-4Z-AA86-01	BLCA	0.72	TRUE	FALSE	TRUE	FALSE	FALSE	TRUE	TRUE	1871.22
TCGA-4Z-AA87-01	BLCA	0.364	TRUE	FALSE	TRUE	FALSE	FALSE	TRUE	TRUE	12736.3
TCGA-4Z-AA89-01	BLCA	0.346	TRUE	FALSE	TRUE	FALSE	FALSE	TRUE	TRUE	973.519
TCGA-50-5044-01	LUAD	0.611	TRUE	TRUE	TRUE	TRUE	FALSE	FALSE	TRUE	144.389
TCGA-50-5045-01	LUAD	0.804	TRUE	FALSE	TRUE	TRUE	FALSE	TRUE	TRUE	634.03
TCGA-50-5049-01	LUAD	0.832	TRUE	TRUE	TRUE	TRUE	FALSE	TRUE	TRUE	1138.87
TCGA-50-5051-01	LUAD	0.284	TRUE	TRUE	TRUE	TRUE	FALSE	TRUE	TRUE	3507.36
TCGA-50-5055-01	LUAD	0.797	TRUE	TRUE	TRUE	TRUE	FALSE	TRUE	TRUE	615.029
TCGA-50-5066-01	LUAD	0.786	TRUE	FALSE	TRUE	TRUE	FALSE	TRUE	TRUE	850.592
TCGA-50-5066-02	LUAD	0.411	TRUE	FALSE	FALSE	FALSE	FALSE	TRUE	TRUE	NA
TCGA-50-5068-01	LUAD	0.799	TRUE	TRUE	TRUE	TRUE	FALSE	TRUE	TRUE	751.425
TCGA-50-5072-01	LUAD	0.333	TRUE	TRUE	TRUE	FALSE	FALSE	TRUE	TRUE	1183.39
TCGA-50-5930-01	LUAD	0.534	TRUE	FALSE	TRUE	TRUE	FALSE	TRUE	TRUE	1163.28
TCGA-50-5931-01	LUAD	0.197	TRUE	TRUE	TRUE	TRUE	FALSE	TRUE	TRUE	8248.73
TCGA-50-5932-01	LUAD	0.248	TRUE	TRUE	TRUE	TRUE	FALSE	TRUE	TRUE	7755.72
TCGA-50-5933-01	LUAD	0.572	TRUE	TRUE	TRUE	TRUE	FALSE	TRUE	TRUE	2097.2
TCGA-50-5935-01	LUAD	0.627	TRUE	TRUE	TRUE	TRUE	FALSE	TRUE	TRUE	5893.14
TCGA-50-5936-01	LUAD	0.306	TRUE	TRUE	TRUE	TRUE	FALSE	TRUE	TRUE	2551.91
TCGA-50-5939-01	LUAD	0.523	TRUE	TRUE	TRUE	TRUE	FALSE	TRUE	TRUE	842.774
TCGA-50-5941-01	LUAD	0.837	TRUE	TRUE	TRUE	TRUE	FALSE	TRUE	TRUE	1783.16
TCGA-50-5942-01	LUAD	0.467	TRUE	TRUE	TRUE	TRUE	FALSE	TRUE	TRUE	537.718
TCGA-50-5944-01	LUAD	0.389	TRUE	TRUE	TRUE	TRUE	FALSE	FALSE	TRUE	5535.88
TCGA-50-5946-01	LUAD	0.241	TRUE	FALSE	TRUE	TRUE	FALSE	TRUE	TRUE	5611.63
TCGA-50-5946-02	LUAD	0.433	TRUE	FALSE	FALSE	FALSE	FALSE	TRUE	TRUE	NA
TCGA-50-6590-01	LUAD	0.755	TRUE	FALSE	TRUE	TRUE	FALSE	TRUE	TRUE	984.485
TCGA-50-6591-01	LUAD	0.08	TRUE	FALSE	TRUE	TRUE	FALSE	TRUE	TRUE	11508.9
TCGA-50-6592-01	LUAD	0.684	TRUE	FALSE	TRUE	TRUE	FALSE	TRUE	TRUE	1315.71
TCGA-50-6593-01	LUAD	0.467	TRUE	TRUE	TRUE	TRUE	FALSE	TRUE	TRUE	2024.68
TCGA-50-6594-01	LUAD	0.499	TRUE	FALSE	TRUE	TRUE	FALSE	TRUE	TRUE	6617.78
TCGA-50-6595-01	LUAD	0.68	TRUE	TRUE	TRUE	TRUE	FALSE	TRUE	TRUE	709.169
TCGA-50-6597-01	LUAD	0.684	TRUE	TRUE	TRUE	TRUE	FALSE	TRUE	TRUE	6444.01
TCGA-50-6673-01	LUAD	0.418	TRUE	TRUE	TRUE	FALSE	FALSE	TRUE	TRUE	2617.95
TCGA-50-7109-01	LUAD	0.484	TRUE	TRUE	TRUE	FALSE	FALSE	TRUE	TRUE	3015.94
TCGA-50-8457-01	LUAD	0.699	TRUE	FALSE	TRUE	FALSE	FALSE	TRUE	TRUE	776.567
TCGA-50-8459-01	LUAD	0.559	TRUE	FALSE	TRUE	FALSE	FALSE	TRUE	TRUE	112.005
TCGA-50-8460-01	LUAD	0.589	TRUE	FALSE	TRUE	FALSE	FALSE	TRUE	TRUE	812.474
TCGA-51-4079-01	LUSC	0.431	TRUE	TRUE	TRUE	TRUE	FALSE	TRUE	TRUE	3868.67
TCGA-51-4080-01	LUSC	0.167	TRUE	TRUE	TRUE	TRUE	FALSE	TRUE	TRUE	9024.82
TCGA-51-4081-01	LUSC	0.084	TRUE	TRUE	TRUE	TRUE	FALSE	TRUE	TRUE	4508.56
TCGA-51-6867-01	LUSC	0.441	TRUE	FALSE	FALSE	FALSE	FALSE	TRUE	TRUE	NA
TCGA-52-7622-01	LUSC	0.637	TRUE	FALSE	TRUE	FALSE	FALSE	TRUE	TRUE	2139.52
TCGA-52-7809-01	LUSC	0.323	TRUE	FALSE	TRUE	FALSE	FALSE	TRUE	TRUE	6210.16
TCGA-52-7810-01	LUSC	0.122	TRUE	FALSE	TRUE	FALSE	FALSE	TRUE	TRUE	9011.03
TCGA-52-7811-01	LUSC	0.408	TRUE	FALSE	TRUE	FALSE	FALSE	TRUE	TRUE	1080.04
TCGA-52-7812-01	LUSC	0.676	TRUE	FALSE	TRUE	FALSE	FALSE	TRUE	TRUE	3077.14
TCGA-53-7624-01	LUAD	0.588	TRUE	FALSE	TRUE	FALSE	FALSE	TRUE	TRUE	5848.11
TCGA-53-7626-01	LUAD	0.743	TRUE	TRUE	TRUE	FALSE	FALSE	TRUE	TRUE	1089.33
TCGA-53-7813-01	LUAD	0.531	TRUE	TRUE	TRUE	FALSE	FALSE	FALSE	TRUE	1997.07
TCGA-53-A4EZ-01	LUAD	0.368	TRUE	FALSE	TRUE	FALSE	FALSE	TRUE	TRUE	3865.33
TCGA-55-1592-01	LUAD	0.431	TRUE	TRUE	TRUE	TRUE	FALSE	TRUE	TRUE	6100.54
TCGA-55-1594-01	LUAD	0.413	TRUE	TRUE	TRUE	TRUE	FALSE	TRUE	TRUE	7856.24
TCGA-55-1595-01	LUAD	0.547	TRUE	FALSE	TRUE	TRUE	FALSE	FALSE	TRUE	12083
TCGA-55-1596-01	LUAD	0.504	TRUE	TRUE	TRUE	TRUE	FALSE	TRUE	TRUE	9421.77
TCGA-55-5899-01	LUAD	0.437	TRUE	FALSE	TRUE	TRUE	FALSE	FALSE	TRUE	5129.48
TCGA-55-6543-01	LUAD	0.428	TRUE	TRUE	TRUE	TRUE	FALSE	TRUE	TRUE	2720.68
TCGA-55-6642-01	LUAD	0.506	TRUE	TRUE	TRUE	TRUE	FALSE	TRUE	TRUE	1035.82
TCGA-55-6712-01	LUAD	0.8	TRUE	TRUE	TRUE	TRUE	FALSE	TRUE	TRUE	2080.23
TCGA-55-6968-01	LUAD	0.487	TRUE	FALSE	TRUE	FALSE	FALSE	TRUE	TRUE	2800.07
TCGA-55-6969-01	LUAD	0.593	TRUE	FALSE	TRUE	FALSE	FALSE	TRUE	TRUE	903.039
TCGA-55-6970-01	LUAD	0.627	TRUE	TRUE	TRUE	FALSE	FALSE	TRUE	TRUE	4068.64
TCGA-55-6971-01	LUAD	0.762	TRUE	TRUE	TRUE	FALSE	FALSE	TRUE	TRUE	3107
TCGA-55-6972-01	LUAD	0.141	TRUE	TRUE	TRUE	FALSE	FALSE	TRUE	TRUE	6281.35
TCGA-55-6975-01	LUAD	0.27	TRUE	FALSE	TRUE	FALSE	FALSE	TRUE	TRUE	1011.33
TCGA-55-6978-01	LUAD	0.785	TRUE	TRUE	TRUE	FALSE	FALSE	TRUE	TRUE	722.978
TCGA-55-6979-01	LUAD	0.803	TRUE	TRUE	TRUE	FALSE	FALSE	TRUE	TRUE	1000.04
TCGA-55-6980-01	LUAD	0.65	TRUE	TRUE	TRUE	FALSE	FALSE	TRUE	TRUE	921.169
TCGA-55-6981-01	LUAD	0.319	TRUE	TRUE	TRUE	FALSE	FALSE	TRUE	TRUE	1814.14
TCGA-55-6982-01	LUAD	0.601	TRUE	TRUE	TRUE	FALSE	FALSE	TRUE	TRUE	1773.54
TCGA-55-6983-01	LUAD	0.5	TRUE	TRUE	TRUE	FALSE	FALSE	TRUE	TRUE	628.776
TCGA-55-6984-01	LUAD	0.438	TRUE	FALSE	TRUE	FALSE	FALSE	TRUE	TRUE	1217.06
TCGA-55-6985-01	LUAD	0.682	TRUE	TRUE	TRUE	FALSE	FALSE	TRUE	TRUE	823.96
TCGA-55-6986-01	LUAD	0.407	TRUE	TRUE	TRUE	FALSE	FALSE	TRUE	TRUE	315.66
TCGA-55-6987-01	LUAD	0.803	TRUE	FALSE	TRUE	FALSE	FALSE	TRUE	TRUE	579.875
TCGA-55-7227-01	LUAD	0.615	TRUE	FALSE	FALSE	FALSE	FALSE	TRUE	TRUE	NA
TCGA-55-7281-01	LUAD	0.659	TRUE	TRUE	TRUE	FALSE	FALSE	FALSE	TRUE	1267.75
TCGA-55-7283-01	LUAD	0.567	TRUE	TRUE	TRUE	FALSE	FALSE	TRUE	TRUE	2307.61
TCGA-55-7284-01	LUAD	0.583	TRUE	FALSE	TRUE	FALSE	FALSE	TRUE	TRUE	954.015
TCGA-55-7570-01	LUAD	0.233	TRUE	FALSE	TRUE	FALSE	FALSE	TRUE	TRUE	1825.22
TCGA-55-7573-01	LUAD	0.613	TRUE	TRUE	TRUE	FALSE	FALSE	FALSE	TRUE	1795.02
TCGA-55-7574-01	LUAD	0.711	TRUE	TRUE	TRUE	FALSE	FALSE	FALSE	TRUE	507.589
TCGA-55-7576-01	LUAD	0.44	TRUE	TRUE	TRUE	FALSE	FALSE	TRUE	TRUE	3246.31
TCGA-55-7724-01	LUAD	0.589	TRUE	TRUE	TRUE	FALSE	FALSE	FALSE	TRUE	402.393
TCGA-55-7725-01	LUAD	0.752	TRUE	TRUE	TRUE	FALSE	FALSE	TRUE	TRUE	910.989
TCGA-55-7726-01	LUAD	0.452	TRUE	TRUE	TRUE	FALSE	FALSE	TRUE	TRUE	1602.89
TCGA-55-7727-01	LUAD	0.517	TRUE	TRUE	TRUE	FALSE	FALSE	TRUE	TRUE	1225.22
TCGA-55-7728-01	LUAD	0.767	TRUE	TRUE	TRUE	FALSE	FALSE	TRUE	TRUE	748.792
TCGA-55-7815-01	LUAD	0.489	TRUE	TRUE	TRUE	FALSE	FALSE	FALSE	TRUE	602.955
TCGA-55-7903-01	LUAD	0.558	TRUE	TRUE	TRUE	FALSE	FALSE	TRUE	TRUE	2919.35
TCGA-55-7907-01	LUAD	0.586	TRUE	TRUE	TRUE	FALSE	FALSE	TRUE	TRUE	3794.07
TCGA-55-7910-01	LUAD	0.349	TRUE	FALSE	TRUE	FALSE	FALSE	TRUE	TRUE	6651.61
TCGA-55-7911-01	LUAD	0.752	TRUE	TRUE	TRUE	FALSE	FALSE	TRUE	TRUE	934.259
TCGA-55-7913-01	LUAD	0.323	TRUE	FALSE	TRUE	FALSE	FALSE	TRUE	FALSE	2045.74
TCGA-55-7914-01	LUAD	0.649	TRUE	TRUE	TRUE	FALSE	FALSE	TRUE	TRUE	1911.05
TCGA-55-7994-01	LUAD	0.792	TRUE	FALSE	TRUE	FALSE	FALSE	TRUE	TRUE	3190.89
TCGA-55-7995-01	LUAD	0.711	TRUE	FALSE	TRUE	FALSE	FALSE	TRUE	TRUE	5044.43
TCGA-55-8085-01	LUAD	0.728	TRUE	FALSE	TRUE	FALSE	FALSE	TRUE	TRUE	3294.05
TCGA-55-8087-01	LUAD	0.262	TRUE	FALSE	TRUE	FALSE	FALSE	TRUE	TRUE	1411.42
TCGA-55-8089-01	LUAD	0.826	TRUE	FALSE	TRUE	FALSE	FALSE	TRUE	TRUE	1013.21
TCGA-55-8090-01	LUAD	0.394	TRUE	FALSE	TRUE	FALSE	FALSE	TRUE	TRUE	1102.89
TCGA-55-8091-01	LUAD	0.567	TRUE	FALSE	TRUE	FALSE	FALSE	TRUE	TRUE	2006.34
TCGA-55-8092-01	LUAD	0.799	TRUE	FALSE	TRUE	FALSE	FALSE	TRUE	TRUE	2219.73
TCGA-55-8094-01	LUAD	0.234	TRUE	FALSE	TRUE	FALSE	FALSE	FALSE	TRUE	6926.07
TCGA-55-8096-01	LUAD	0.5	TRUE	FALSE	TRUE	FALSE	FALSE	TRUE	TRUE	2190.77
TCGA-55-8097-01	LUAD	0.434	TRUE	FALSE	TRUE	FALSE	FALSE	TRUE	TRUE	1152.95
TCGA-55-8203-01	LUAD	0.61	TRUE	FALSE	TRUE	FALSE	FALSE	TRUE	TRUE	1936.05
TCGA-55-8204-01	LUAD	0.574	TRUE	FALSE	TRUE	FALSE	FALSE	TRUE	FALSE	1381.2
TCGA-55-8205-01	LUAD	0.848	TRUE	FALSE	TRUE	FALSE	FALSE	TRUE	TRUE	1337.84
TCGA-55-8206-01	LUAD	0.477	TRUE	FALSE	TRUE	FALSE	FALSE	TRUE	TRUE	2793.23
TCGA-55-8207-01	LUAD	0.446	TRUE	FALSE	TRUE	FALSE	FALSE	TRUE	TRUE	3086.41
TCGA-55-8208-01	LUAD	0.794	TRUE	FALSE	TRUE	FALSE	FALSE	TRUE	TRUE	493.085
TCGA-55-8299-01	LUAD	0.799	TRUE	FALSE	TRUE	FALSE	FALSE	FALSE	TRUE	49.4701
TCGA-55-8301-01	LUAD	0.814	TRUE	FALSE	TRUE	FALSE	FALSE	TRUE	TRUE	1094.89
TCGA-55-8302-01	LUAD	0.536	TRUE	FALSE	TRUE	FALSE	FALSE	FALSE	TRUE	1074.14
TCGA-55-8505-01	LUAD	0.207	TRUE	FALSE	TRUE	FALSE	FALSE	TRUE	TRUE	358.331
TCGA-55-8506-01	LUAD	0.536	TRUE	FALSE	TRUE	FALSE	FALSE	TRUE	TRUE	3577.38
TCGA-55-8507-01	LUAD	0.368	TRUE	FALSE	TRUE	FALSE	FALSE	TRUE	TRUE	4184.34
TCGA-55-8508-01	LUAD	0.457	TRUE	FALSE	TRUE	FALSE	FALSE	FALSE	TRUE	1600.71
TCGA-55-8510-01	LUAD	0.745	TRUE	FALSE	TRUE	FALSE	FALSE	FALSE	TRUE	1257.76
TCGA-55-8511-01	LUAD	0.681	TRUE	FALSE	TRUE	FALSE	FALSE	FALSE	TRUE	2280.24
TCGA-55-8512-01	LUAD	0.346	TRUE	FALSE	TRUE	FALSE	FALSE	FALSE	TRUE	748.12
TCGA-55-8513-01	LUAD	0.642	TRUE	FALSE	TRUE	FALSE	FALSE	TRUE	TRUE	5.33358
TCGA-55-8514-01	LUAD	0.501	TRUE	FALSE	TRUE	FALSE	FALSE	TRUE	TRUE	4073.01
TCGA-55-8614-01	LUAD	0.457	TRUE	FALSE	TRUE	FALSE	FALSE	TRUE	TRUE	3615.71
TCGA-55-8615-01	LUAD	0.179	TRUE	FALSE	TRUE	FALSE	FALSE	FALSE	TRUE	5259.12
TCGA-55-8616-01	LUAD	0.449	TRUE	FALSE	TRUE	FALSE	FALSE	TRUE	TRUE	3766.26
TCGA-55-8619-01	LUAD	0.752	TRUE	FALSE	TRUE	FALSE	FALSE	TRUE	TRUE	74.7469
TCGA-55-8620-01	LUAD	0.471	TRUE	FALSE	TRUE	FALSE	FALSE	TRUE	TRUE	3868.25
TCGA-55-8621-01	LUAD	0.726	TRUE	FALSE	TRUE	FALSE	FALSE	TRUE	TRUE	54.8013
TCGA-55-A48X-01	LUAD	0.7	TRUE	FALSE	TRUE	FALSE	FALSE	TRUE	TRUE	387.119
TCGA-55-A48Y-01	LUAD	0.363	TRUE	FALSE	TRUE	FALSE	FALSE	TRUE	TRUE	705.281
TCGA-55-A48Z-01	LUAD	0.539	TRUE	FALSE	TRUE	FALSE	FALSE	TRUE	TRUE	3376.22
TCGA-55-A491-01	LUAD	0.526	TRUE	FALSE	TRUE	FALSE	FALSE	TRUE	TRUE	3196.58
TCGA-55-A492-01	LUAD	0.376	TRUE	FALSE	TRUE	FALSE	FALSE	TRUE	TRUE	2567.81
TCGA-55-A493-01	LUAD	0.685	TRUE	FALSE	TRUE	FALSE	FALSE	TRUE	TRUE	773.985
TCGA-55-A494-01	LUAD	0.079	TRUE	FALSE	TRUE	FALSE	FALSE	TRUE	TRUE	9589.2
TCGA-55-A4DF-01	LUAD	0.675	TRUE	FALSE	TRUE	FALSE	FALSE	FALSE	TRUE	4958.11
TCGA-55-A4DG-01	LUAD	0.576	TRUE	FALSE	TRUE	FALSE	FALSE	TRUE	TRUE	4482.87
TCGA-55-A57B-01	LUAD	0.531	TRUE	FALSE	TRUE	FALSE	FALSE	TRUE	TRUE	1164.42
TCGA-56-1622-01	LUSC	0.198	TRUE	TRUE	TRUE	TRUE	FALSE	TRUE	TRUE	10098.3
TCGA-56-5897-01	LUSC	0.546	TRUE	TRUE	TRUE	TRUE	FALSE	TRUE	TRUE	622.565
TCGA-56-5898-01	LUSC	0.384	TRUE	TRUE	TRUE	TRUE	FALSE	TRUE	TRUE	2918.12
TCGA-56-6545-01	LUSC	0.659	TRUE	TRUE	TRUE	TRUE	FALSE	TRUE	TRUE	3686.3
TCGA-56-6546-01	LUSC	0.648	TRUE	TRUE	TRUE	TRUE	FALSE	TRUE	TRUE	943.185
TCGA-56-7221-01	LUSC	0.17	TRUE	FALSE	TRUE	FALSE	FALSE	TRUE	TRUE	2169.7
TCGA-56-7222-01	LUSC	0.22	TRUE	FALSE	TRUE	FALSE	FALSE	TRUE	TRUE	3406.63
TCGA-56-7223-01	LUSC	0.051	TRUE	FALSE	TRUE	FALSE	FALSE	TRUE	TRUE	7344.02
TCGA-56-7579-01	LUSC	0.206	TRUE	FALSE	TRUE	FALSE	FALSE	TRUE	TRUE	5374.37
TCGA-56-7580-01	LUSC	0.335	TRUE	FALSE	TRUE	FALSE	FALSE	TRUE	TRUE	2784.83
TCGA-56-7582-01	LUSC	0.236	TRUE	FALSE	TRUE	FALSE	FALSE	TRUE	TRUE	4494.56
TCGA-56-7730-01	LUSC	0.102	TRUE	FALSE	TRUE	FALSE	FALSE	TRUE	TRUE	9735.21
TCGA-56-7731-01	LUSC	0.522	TRUE	FALSE	TRUE	FALSE	FALSE	TRUE	TRUE	392.294
TCGA-56-7822-01	LUSC	0.253	TRUE	FALSE	TRUE	FALSE	FALSE	TRUE	TRUE	1913.26
TCGA-56-7823-01	LUSC	0.199	TRUE	FALSE	TRUE	FALSE	FALSE	TRUE	FALSE	6456.76
TCGA-56-8082-01	LUSC	0.241	TRUE	FALSE	TRUE	FALSE	FALSE	TRUE	FALSE	6328.42
TCGA-56-8083-01	LUSC	0.109	TRUE	FALSE	TRUE	FALSE	FALSE	TRUE	FALSE	7959.12
TCGA-56-8201-01	LUSC	0.745	TRUE	FALSE	TRUE	FALSE	FALSE	TRUE	FALSE	1970.69
TCGA-56-8304-01	LUSC	0.488	TRUE	FALSE	TRUE	FALSE	FALSE	TRUE	TRUE	2464.43
TCGA-56-8305-01	LUSC	0.187	TRUE	FALSE	TRUE	FALSE	FALSE	TRUE	FALSE	2290.99
TCGA-56-8307-01	LUSC	0.696	TRUE	FALSE	TRUE	FALSE	FALSE	TRUE	TRUE	2455
TCGA-56-8308-01	LUSC	0.321	TRUE	FALSE	TRUE	FALSE	FALSE	FALSE	TRUE	5020.51
TCGA-56-8309-01	LUSC	0.769	TRUE	FALSE	TRUE	FALSE	FALSE	TRUE	TRUE	651.612
TCGA-56-8503-01	LUSC	0.695	TRUE	FALSE	TRUE	FALSE	FALSE	TRUE	TRUE	448.039
TCGA-56-8504-01	LUSC	0.393	TRUE	FALSE	TRUE	FALSE	FALSE	FALSE	TRUE	4038.45
TCGA-56-8622-01	LUSC	0.285	TRUE	FALSE	TRUE	FALSE	FALSE	TRUE	TRUE	3999.42
TCGA-56-8623-01	LUSC	0.717	TRUE	FALSE	TRUE	FALSE	FALSE	FALSE	TRUE	1.37422
TCGA-56-8624-01	LUSC	0.256	TRUE	FALSE	TRUE	FALSE	FALSE	FALSE	TRUE	1307.49
TCGA-56-8625-01	LUSC	0.748	TRUE	FALSE	TRUE	FALSE	FALSE	FALSE	TRUE	1883.16
TCGA-56-8626-01	LUSC	0.293	TRUE	FALSE	TRUE	FALSE	FALSE	TRUE	TRUE	3370.29
TCGA-56-8628-01	LUSC	0.533	TRUE	FALSE	TRUE	FALSE	FALSE	TRUE	TRUE	2840.53
TCGA-56-8629-01	LUSC	0.274	TRUE	FALSE	TRUE	FALSE	FALSE	TRUE	TRUE	6301.28
TCGA-56-A49D-01	LUSC	0.637	TRUE	FALSE	TRUE	FALSE	FALSE	TRUE	TRUE	5043.54
TCGA-56-A4BW-01	LUSC	0.469	TRUE	FALSE	TRUE	FALSE	FALSE	FALSE	TRUE	5723.11
TCGA-56-A4BX-01	LUSC	0.059	TRUE	FALSE	TRUE	FALSE	FALSE	TRUE	TRUE	10104.2
TCGA-56-A4BY-01	LUSC	0.269	TRUE	FALSE	TRUE	FALSE	FALSE	TRUE	TRUE	3986.64
TCGA-56-A4ZJ-01	LUSC	0.557	TRUE	FALSE	TRUE	FALSE	FALSE	TRUE	TRUE	448.617
TCGA-56-A4ZK-01	LUSC	0.512	TRUE	FALSE	TRUE	FALSE	FALSE	TRUE	TRUE	3583.08
TCGA-56-A5DR-01	LUSC	0.273	TRUE	FALSE	TRUE	FALSE	FALSE	TRUE	TRUE	2718.03
TCGA-56-A5DS-01	LUSC	0.45	TRUE	FALSE	TRUE	FALSE	FALSE	TRUE	TRUE	476.722
TCGA-56-A62T-01	LUSC	0.216	TRUE	FALSE	TRUE	FALSE	FALSE	TRUE	TRUE	3108.16
TCGA-57-1582-01	OV	0.171	TRUE	TRUE	TRUE	TRUE	FALSE	TRUE	TRUE	11521.5
TCGA-57-1583-01	OV	0.215	TRUE	TRUE	TRUE	TRUE	FALSE	TRUE	TRUE	14602
TCGA-57-1584-01	OV	0.296	TRUE	TRUE	TRUE	TRUE	FALSE	TRUE	TRUE	8864.4
TCGA-57-1993-01	OV	0.228	TRUE	FALSE	TRUE	TRUE	FALSE	TRUE	TRUE	9162.97
TCGA-57-1994-01	OV	0.567	TRUE	FALSE	TRUE	FALSE	FALSE	TRUE	TRUE	10784.1
TCGA-58-8386-01	LUSC	0.438	TRUE	FALSE	TRUE	FALSE	FALSE	TRUE	TRUE	3932.3
TCGA-58-8387-01	LUSC	0.633	TRUE	FALSE	TRUE	FALSE	FALSE	TRUE	TRUE	2292.8
TCGA-58-8388-01	LUSC	0.512	TRUE	FALSE	TRUE	FALSE	FALSE	TRUE	TRUE	3418.65
TCGA-58-8390-01	LUSC	0.309	TRUE	FALSE	TRUE	FALSE	FALSE	FALSE	TRUE	5265.03
TCGA-58-8391-01	LUSC	0.181	TRUE	FALSE	TRUE	FALSE	FALSE	TRUE	TRUE	6362.65
TCGA-58-8392-01	LUSC	0.187	TRUE	FALSE	TRUE	FALSE	FALSE	TRUE	TRUE	7210.36
TCGA-58-8393-01	LUSC	0.689	TRUE	FALSE	TRUE	FALSE	FALSE	TRUE	TRUE	2096.2
TCGA-58-A46J-01	LUSC	0.373	TRUE	FALSE	TRUE	FALSE	FALSE	TRUE	TRUE	1221.9
TCGA-58-A46K-01	LUSC	0.329	TRUE	FALSE	TRUE	FALSE	FALSE	TRUE	TRUE	3342.99
TCGA-58-A46L-01	LUSC	0.447	TRUE	FALSE	TRUE	FALSE	FALSE	TRUE	TRUE	5786.38
TCGA-58-A46M-01	LUSC	0.475	TRUE	FALSE	TRUE	FALSE	FALSE	TRUE	TRUE	8795.11
TCGA-58-A46N-01	LUSC	0.117	TRUE	FALSE	TRUE	FALSE	FALSE	TRUE	TRUE	24708.9
TCGA-59-2348-01	OV	0.272	TRUE	FALSE	TRUE	TRUE	FALSE	TRUE	TRUE	9642.79
TCGA-59-2350-01	OV	0.305	TRUE	FALSE	TRUE	TRUE	FALSE	FALSE	TRUE	6336.54
TCGA-59-2351-01	OV	0.437	TRUE	FALSE	TRUE	TRUE	FALSE	TRUE	TRUE	3459.65
TCGA-59-2352-01	OV	0.451	TRUE	FALSE	TRUE	TRUE	FALSE	TRUE	TRUE	6916.36
TCGA-59-2355-01	OV	0.385	TRUE	FALSE	TRUE	TRUE	FALSE	TRUE	TRUE	4966.38
TCGA-59-2363-01	OV	0.18	TRUE	FALSE	TRUE	TRUE	FALSE	TRUE	TRUE	9077.02
TCGA-5B-A90C-01	UCEC	0.206	TRUE	FALSE	TRUE	FALSE	TRUE	TRUE	TRUE	10768.1
TCGA-5C-A9VG-01	LIHC	0.101	TRUE	FALSE	TRUE	FALSE	FALSE	TRUE	TRUE	2193.21
TCGA-5C-A9VH-01	LIHC	0.307	TRUE	FALSE	TRUE	FALSE	FALSE	TRUE	TRUE	6919.16
TCGA-5C-AAPD-01	LIHC	0.693	TRUE	FALSE	TRUE	FALSE	FALSE	TRUE	TRUE	3361.49
TCGA-5G-A9ZZ-01	THYM	0.716	TRUE	TRUE	TRUE	FALSE	FALSE	TRUE	TRUE	625.984
TCGA-5K-AAAP-01	THYM	0.548	TRUE	TRUE	TRUE	FALSE	FALSE	TRUE	TRUE	92.5203
TCGA-5L-AAT0-01	BRCA	0.468	TRUE	FALSE	TRUE	FALSE	FALSE	TRUE	FALSE	836.857
TCGA-5L-AAT1-01	BRCA	0.685	TRUE	FALSE	TRUE	FALSE	FALSE	TRUE	FALSE	384.739
TCGA-5M-AAT4-01	COAD	0.176	TRUE	FALSE	TRUE	FALSE	TRUE	TRUE	FALSE	3058.84
TCGA-5M-AAT5-01	COAD	0.237	TRUE	FALSE	TRUE	FALSE	TRUE	TRUE	FALSE	4675.42
TCGA-5M-AAT6-01	COAD	0.665	TRUE	FALSE	TRUE	FALSE	TRUE	TRUE	FALSE	381.657
TCGA-5M-AATA-01	COAD	0.286	TRUE	FALSE	TRUE	FALSE	TRUE	TRUE	FALSE	2580.48
TCGA-5M-AATE-01	COAD	0.251	TRUE	FALSE	TRUE	FALSE	TRUE	TRUE	FALSE	8499.99
TCGA-5N-A9KI-01	BLCA	0.425	TRUE	FALSE	TRUE	FALSE	FALSE	TRUE	FALSE	3808.48
TCGA-5N-A9KM-01	BLCA	0.449	TRUE	FALSE	TRUE	FALSE	FALSE	TRUE	FALSE	2453.77
TCGA-5P-A9JU-01	KIRP	0.14	TRUE	FALSE	TRUE	FALSE	FALSE	FALSE	FALSE	2669.34
TCGA-5P-A9JV-01	KIRP	0.345	TRUE	FALSE	TRUE	FALSE	FALSE	TRUE	FALSE	205.784
TCGA-5P-A9JW-01	KIRP	0.384	TRUE	FALSE	TRUE	FALSE	FALSE	TRUE	FALSE	463.17
TCGA-5P-A9JY-01	KIRP	0.319	TRUE	FALSE	TRUE	FALSE	FALSE	TRUE	FALSE	3659.9
TCGA-5P-A9JZ-01	KIRP	0.214	TRUE	FALSE	TRUE	FALSE	FALSE	TRUE	FALSE	2846.74
TCGA-5P-A9K0-01	KIRP	0.278	TRUE	FALSE	TRUE	FALSE	FALSE	TRUE	FALSE	3095.01
TCGA-5P-A9K2-01	KIRP	0.177	TRUE	FALSE	TRUE	FALSE	FALSE	TRUE	FALSE	2884.66
TCGA-5P-A9K3-01	KIRP	0.276	TRUE	FALSE	TRUE	FALSE	FALSE	TRUE	FALSE	2613.96
TCGA-5P-A9K4-01	KIRP	0.159	TRUE	FALSE	TRUE	FALSE	FALSE	TRUE	FALSE	5017.84
TCGA-5P-A9K6-01	KIRP	0.29	TRUE	FALSE	TRUE	FALSE	FALSE	TRUE	FALSE	2686.15
TCGA-5P-A9K8-01	KIRP	0.195	TRUE	FALSE	TRUE	FALSE	FALSE	TRUE	FALSE	2533.58
TCGA-5P-A9K9-01	KIRP	0.236	TRUE	FALSE	TRUE	FALSE	FALSE	TRUE	FALSE	4150.98
TCGA-5P-A9KA-01	KIRP	0.436	TRUE	FALSE	TRUE	FALSE	FALSE	FALSE	FALSE	511.284
TCGA-5P-A9KC-01	KIRP	0.31	TRUE	FALSE	TRUE	FALSE	FALSE	TRUE	FALSE	1140.27
TCGA-5P-A9KE-01	KIRP	0.258	TRUE	FALSE	TRUE	FALSE	FALSE	FALSE	FALSE	1186.08
TCGA-5P-A9KF-01	KIRP	0.204	TRUE	FALSE	FALSE	FALSE	FALSE	TRUE	FALSE	NA
TCGA-5P-A9KH-01	KIRP	0.228	TRUE	FALSE	TRUE	FALSE	FALSE	TRUE	FALSE	5311.33
TCGA-5R-AA1C-01	LIHC	0.421	TRUE	FALSE	TRUE	FALSE	FALSE	TRUE	TRUE	7955.15
TCGA-5R-AA1D-01	LIHC	0.413	TRUE	FALSE	TRUE	FALSE	FALSE	FALSE	TRUE	253.164
TCGA-5R-AAAM-01	LIHC	0.479	TRUE	FALSE	TRUE	FALSE	FALSE	TRUE	TRUE	772.937
TCGA-5S-A9Q8-01	UCEC	0.269	TRUE	FALSE	TRUE	FALSE	TRUE	TRUE	TRUE	1318.37
TCGA-5T-A9QA-01	BRCA	0.151	TRUE	FALSE	TRUE	FALSE	FALSE	TRUE	TRUE	7392.81
TCGA-5U-AB0D-01	THYM	0.645	TRUE	TRUE	TRUE	FALSE	FALSE	TRUE	TRUE	3568.04
TCGA-5U-AB0E-01	THYM	0.651	TRUE	TRUE	TRUE	FALSE	FALSE	TRUE	TRUE	689.512
TCGA-5U-AB0F-01	THYM	0.708	TRUE	TRUE	TRUE	FALSE	FALSE	TRUE	TRUE	38.3818
TCGA-5V-A9RR-01	THYM	0.522	TRUE	TRUE	TRUE	FALSE	FALSE	TRUE	TRUE	22.2713
TCGA-60-2695-01	LUSC	0.488	TRUE	FALSE	TRUE	FALSE	FALSE	TRUE	TRUE	12781.4
TCGA-60-2696-01	LUSC	0.549	TRUE	FALSE	TRUE	FALSE	FALSE	TRUE	TRUE	1721.58
TCGA-60-2697-01	LUSC	0.732	TRUE	FALSE	TRUE	FALSE	FALSE	TRUE	TRUE	31.0817
TCGA-60-2698-01	LUSC	0.621	TRUE	TRUE	TRUE	TRUE	FALSE	TRUE	TRUE	3671.05
TCGA-60-2703-01	LUSC	0.247	TRUE	FALSE	TRUE	FALSE	FALSE	TRUE	TRUE	1935.25
TCGA-60-2704-01	LUSC	0.545	TRUE	FALSE	TRUE	FALSE	FALSE	TRUE	TRUE	1644.4
TCGA-60-2706-01	LUSC	0.488	TRUE	FALSE	TRUE	FALSE	FALSE	TRUE	TRUE	6849.85
TCGA-60-2707-01	LUSC	0.388	TRUE	TRUE	TRUE	TRUE	FALSE	TRUE	TRUE	2048.56
TCGA-60-2708-01	LUSC	0.221	TRUE	TRUE	TRUE	TRUE	FALSE	TRUE	TRUE	8549.2
TCGA-60-2709-01	LUSC	0.599	TRUE	TRUE	TRUE	TRUE	FALSE	TRUE	TRUE	486.95
TCGA-60-2710-01	LUSC	0.512	TRUE	TRUE	TRUE	FALSE	FALSE	TRUE	TRUE	5056.78
TCGA-60-2711-01	LUSC	0.402	TRUE	TRUE	TRUE	TRUE	FALSE	TRUE	TRUE	9008.98
TCGA-60-2712-01	LUSC	0.811	TRUE	TRUE	TRUE	TRUE	FALSE	TRUE	TRUE	2559.94
TCGA-60-2713-01	LUSC	0.514	TRUE	TRUE	TRUE	TRUE	FALSE	TRUE	TRUE	5759.51
TCGA-60-2714-01	LUSC	0.656	TRUE	FALSE	TRUE	FALSE	FALSE	TRUE	TRUE	4842.92
TCGA-60-2715-01	LUSC	0.576	TRUE	TRUE	TRUE	TRUE	FALSE	TRUE	TRUE	1308.7
TCGA-60-2716-01	LUSC	0.128	TRUE	FALSE	TRUE	FALSE	FALSE	TRUE	TRUE	5.01313
TCGA-60-2719-01	LUSC	0.408	TRUE	TRUE	TRUE	TRUE	FALSE	TRUE	TRUE	9080.33
TCGA-60-2720-01	LUSC	0.581	TRUE	TRUE	TRUE	TRUE	FALSE	TRUE	TRUE	825.152
TCGA-60-2721-01	LUSC	0.67	TRUE	TRUE	TRUE	TRUE	FALSE	TRUE	TRUE	3554.68
TCGA-60-2722-01	LUSC	0.162	TRUE	TRUE	TRUE	TRUE	FALSE	TRUE	TRUE	15931.5
TCGA-60-2723-01	LUSC	0.591	TRUE	TRUE	TRUE	TRUE	FALSE	TRUE	TRUE	4666.45
TCGA-60-2724-01	LUSC	0.247	TRUE	TRUE	TRUE	TRUE	FALSE	TRUE	TRUE	2293.28
TCGA-60-2725-01	LUSC	0.702	TRUE	TRUE	TRUE	TRUE	FALSE	FALSE	TRUE	1229.2
TCGA-60-2726-01	LUSC	0.477	TRUE	TRUE	TRUE	TRUE	FALSE	TRUE	TRUE	7235.54
TCGA-61-1721-01	OV	0.294	TRUE	FALSE	TRUE	FALSE	FALSE	TRUE	TRUE	1.909
TCGA-61-1724-01	OV	0.294	TRUE	FALSE	TRUE	FALSE	FALSE	TRUE	TRUE	13017.1
TCGA-61-1725-01	OV	0.336	TRUE	FALSE	TRUE	FALSE	FALSE	TRUE	TRUE	8129.36
TCGA-61-1728-01	OV	0.213	TRUE	FALSE	TRUE	TRUE	FALSE	TRUE	TRUE	12328.1
TCGA-61-1733-01	OV	0.236	TRUE	FALSE	TRUE	FALSE	FALSE	TRUE	TRUE	10607.2
TCGA-61-1736-01	OV	0.355	TRUE	FALSE	TRUE	TRUE	FALSE	TRUE	TRUE	6253.14
TCGA-61-1738-01	OV	0.379	TRUE	FALSE	TRUE	FALSE	FALSE	TRUE	TRUE	8452.48
TCGA-61-1740-01	OV	0.647	TRUE	FALSE	TRUE	FALSE	FALSE	TRUE	TRUE	7112.67
TCGA-61-1741-01	OV	0.411	TRUE	FALSE	TRUE	FALSE	FALSE	TRUE	TRUE	10766.3
TCGA-61-1743-01	OV	0.239	TRUE	FALSE	TRUE	FALSE	FALSE	TRUE	TRUE	11293.1
TCGA-61-1900-01	OV	0.149	TRUE	FALSE	TRUE	FALSE	FALSE	TRUE	TRUE	11372.4
TCGA-61-1907-01	OV	0.716	TRUE	FALSE	TRUE	FALSE	FALSE	TRUE	TRUE	10855
TCGA-61-1910-01	OV	0.234	TRUE	FALSE	TRUE	FALSE	FALSE	TRUE	TRUE	15254.9
TCGA-61-1914-01	OV	0.334	TRUE	FALSE	TRUE	FALSE	FALSE	TRUE	TRUE	6117.62
TCGA-61-1917-01	OV	0.468	TRUE	FALSE	TRUE	FALSE	FALSE	TRUE	TRUE	12456.3
TCGA-61-1918-01	OV	0.372	TRUE	FALSE	TRUE	FALSE	FALSE	TRUE	TRUE	13246.3
TCGA-61-1919-01	OV	0.499	TRUE	FALSE	TRUE	TRUE	FALSE	TRUE	TRUE	7854.17
TCGA-61-1995-01	OV	0.387	TRUE	FALSE	TRUE	TRUE	FALSE	TRUE	TRUE	5054.94
TCGA-61-1998-01	OV	0.266	TRUE	FALSE	TRUE	TRUE	FALSE	TRUE	TRUE	4617.64
TCGA-61-2000-01	OV	0.333	TRUE	FALSE	TRUE	TRUE	FALSE	TRUE	TRUE	14690
TCGA-61-2008-01	OV	0.315	TRUE	FALSE	TRUE	TRUE	FALSE	TRUE	TRUE	9616.28
TCGA-61-2008-02	OV	0.594	TRUE	FALSE	FALSE	FALSE	FALSE	TRUE	TRUE	NA
TCGA-61-2009-01	OV	0.395	TRUE	FALSE	TRUE	TRUE	FALSE	TRUE	TRUE	8838.9
TCGA-61-2012-01	OV	0.571	TRUE	FALSE	TRUE	TRUE	FALSE	TRUE	TRUE	8070.81
TCGA-61-2016-01	OV	0.389	TRUE	FALSE	TRUE	TRUE	FALSE	TRUE	TRUE	6809.43
TCGA-61-2088-01	OV	0.076	TRUE	FALSE	TRUE	TRUE	FALSE	TRUE	TRUE	11739.4
TCGA-61-2092-01	OV	0.11	TRUE	FALSE	TRUE	TRUE	FALSE	TRUE	TRUE	3241.9
TCGA-61-2094-01	OV	0.826	TRUE	FALSE	TRUE	TRUE	FALSE	TRUE	TRUE	2697.45
TCGA-61-2097-01	OV	0.251	TRUE	FALSE	TRUE	TRUE	FALSE	TRUE	TRUE	6667.3
TCGA-61-2098-01	OV	0.055	TRUE	FALSE	TRUE	FALSE	FALSE	TRUE	TRUE	8993.88
TCGA-61-2102-01	OV	0.084	TRUE	FALSE	TRUE	TRUE	FALSE	TRUE	TRUE	13202
TCGA-61-2104-01	OV	0.583	TRUE	FALSE	TRUE	TRUE	FALSE	TRUE	TRUE	9728.85
TCGA-61-2109-01	OV	0.343	TRUE	FALSE	TRUE	TRUE	FALSE	TRUE	TRUE	10499.8
TCGA-61-2110-01	OV	0.196	TRUE	FALSE	TRUE	TRUE	FALSE	TRUE	TRUE	6919.33
TCGA-61-2111-01	OV	0.292	TRUE	FALSE	TRUE	TRUE	FALSE	TRUE	TRUE	5189.22
TCGA-61-2113-01	OV	0.417	TRUE	FALSE	TRUE	TRUE	FALSE	TRUE	TRUE	5999.65
TCGA-62-8394-01	LUAD	0.585	TRUE	FALSE	TRUE	FALSE	FALSE	TRUE	TRUE	4230.52
TCGA-62-8395-01	LUAD	0.351	TRUE	FALSE	TRUE	FALSE	FALSE	TRUE	TRUE	1946.47
TCGA-62-8397-01	LUAD	0.463	TRUE	FALSE	TRUE	FALSE	FALSE	TRUE	TRUE	3469.53
TCGA-62-8398-01	LUAD	0.475	TRUE	FALSE	TRUE	FALSE	FALSE	TRUE	TRUE	2157.18
TCGA-62-8399-01	LUAD	0.291	TRUE	FALSE	TRUE	FALSE	FALSE	TRUE	TRUE	2737.99
TCGA-62-8402-01	LUAD	0.827	TRUE	FALSE	TRUE	FALSE	FALSE	TRUE	TRUE	3001.82
TCGA-62-A46O-01	LUAD	0.127	TRUE	FALSE	TRUE	FALSE	FALSE	FALSE	TRUE	10797.8
TCGA-62-A46P-01	LUAD	0.297	TRUE	FALSE	TRUE	FALSE	FALSE	TRUE	TRUE	2375.38
TCGA-62-A46R-01	LUAD	0.569	TRUE	FALSE	TRUE	FALSE	FALSE	FALSE	TRUE	2290.59
TCGA-62-A46S-01	LUAD	0.443	TRUE	FALSE	TRUE	FALSE	FALSE	TRUE	TRUE	6229.64
TCGA-62-A46U-01	LUAD	0.837	TRUE	FALSE	TRUE	FALSE	FALSE	TRUE	TRUE	1311.75
TCGA-62-A46V-01	LUAD	0.284	TRUE	FALSE	TRUE	FALSE	FALSE	TRUE	TRUE	2099.88
TCGA-62-A46Y-01	LUAD	0.637	TRUE	FALSE	TRUE	FALSE	FALSE	TRUE	TRUE	1043.38
TCGA-62-A470-01	LUAD	0.268	TRUE	FALSE	TRUE	FALSE	FALSE	TRUE	TRUE	2877.82
TCGA-62-A471-01	LUAD	0.324	TRUE	FALSE	TRUE	FALSE	FALSE	TRUE	TRUE	2371.51
TCGA-62-A472-01	LUAD	0.495	TRUE	FALSE	TRUE	FALSE	FALSE	TRUE	TRUE	2905.44
TCGA-63-5128-01	LUSC	0.126	TRUE	TRUE	TRUE	TRUE	FALSE	TRUE	FALSE	6107.85
TCGA-63-5131-01	LUSC	0.335	TRUE	TRUE	TRUE	TRUE	FALSE	TRUE	FALSE	5080.02
TCGA-63-6202-01	LUSC	0.67	TRUE	TRUE	TRUE	TRUE	FALSE	TRUE	FALSE	2143.06
TCGA-63-7020-01	LUSC	0.547	TRUE	FALSE	TRUE	FALSE	FALSE	TRUE	FALSE	3429.83
TCGA-63-7021-01	LUSC	0.538	TRUE	FALSE	TRUE	FALSE	FALSE	TRUE	FALSE	543.576
TCGA-63-7022-01	LUSC	0.649	TRUE	FALSE	TRUE	FALSE	FALSE	TRUE	FALSE	337.774
TCGA-63-7023-01	LUSC	0.431	TRUE	FALSE	TRUE	FALSE	FALSE	TRUE	FALSE	9708.11
TCGA-63-A5M9-01	LUSC	0.339	TRUE	FALSE	TRUE	FALSE	FALSE	TRUE	FALSE	16753.1
TCGA-63-A5MB-01	LUSC	0.319	TRUE	FALSE	TRUE	FALSE	FALSE	TRUE	TRUE	18172.4
TCGA-63-A5MG-01	LUSC	0.428	TRUE	FALSE	TRUE	FALSE	FALSE	TRUE	TRUE	447.049
TCGA-63-A5MH-01	LUSC	0.227	TRUE	FALSE	TRUE	FALSE	FALSE	TRUE	TRUE	8105.63
TCGA-63-A5MI-01	LUSC	0.156	TRUE	FALSE	TRUE	FALSE	FALSE	TRUE	TRUE	6009.41
TCGA-63-A5MJ-01	LUSC	0.306	TRUE	FALSE	TRUE	FALSE	FALSE	TRUE	TRUE	5370.87
TCGA-63-A5ML-01	LUSC	0.274	TRUE	FALSE	TRUE	FALSE	FALSE	TRUE	TRUE	9539.65
TCGA-63-A5MM-01	LUSC	0.787	TRUE	FALSE	TRUE	FALSE	FALSE	TRUE	TRUE	354.102
TCGA-63-A5MN-01	LUSC	0.825	TRUE	FALSE	TRUE	FALSE	FALSE	TRUE	TRUE	118.213
TCGA-63-A5MP-01	LUSC	0.553	TRUE	FALSE	TRUE	FALSE	FALSE	TRUE	TRUE	5309.88
TCGA-63-A5MR-01	LUSC	0.435	TRUE	FALSE	TRUE	FALSE	FALSE	TRUE	TRUE	1695.25
TCGA-63-A5MS-01	LUSC	0.565	TRUE	FALSE	TRUE	FALSE	FALSE	TRUE	TRUE	2482.52
TCGA-63-A5MT-01	LUSC	0.504	TRUE	FALSE	TRUE	FALSE	FALSE	TRUE	TRUE	2857.89
TCGA-63-A5MU-01	LUSC	0.202	TRUE	FALSE	TRUE	FALSE	FALSE	TRUE	TRUE	10816.8
TCGA-63-A5MV-01	LUSC	0.39	TRUE	FALSE	TRUE	FALSE	FALSE	TRUE	TRUE	4496.32
TCGA-63-A5MW-01	LUSC	0.255	TRUE	FALSE	TRUE	FALSE	FALSE	TRUE	TRUE	14807.8
TCGA-63-A5MY-01	LUSC	0.056	TRUE	FALSE	TRUE	FALSE	FALSE	TRUE	TRUE	12697.9
TCGA-64-1676-01	LUAD	0.66	TRUE	TRUE	TRUE	TRUE	FALSE	TRUE	TRUE	5775.29
TCGA-64-1677-01	LUAD	0.659	TRUE	TRUE	TRUE	TRUE	FALSE	TRUE	TRUE	1658.03
TCGA-64-1678-01	LUAD	0.22	TRUE	TRUE	TRUE	TRUE	FALSE	TRUE	TRUE	6971.99
TCGA-64-1679-01	LUAD	0.418	TRUE	TRUE	TRUE	FALSE	FALSE	TRUE	TRUE	1814.45
TCGA-64-1680-01	LUAD	0.399	TRUE	TRUE	TRUE	TRUE	FALSE	TRUE	TRUE	2844.69
TCGA-64-1681-01	LUAD	0.645	TRUE	TRUE	TRUE	FALSE	FALSE	TRUE	TRUE	2122.35
TCGA-64-5774-01	LUAD	0.257	TRUE	TRUE	TRUE	TRUE	FALSE	TRUE	TRUE	5029.24
TCGA-64-5775-01	LUAD	0.278	TRUE	TRUE	TRUE	FALSE	FALSE	TRUE	TRUE	5818.76
TCGA-64-5778-01	LUAD	0.797	TRUE	TRUE	TRUE	TRUE	FALSE	TRUE	TRUE	3138.99
TCGA-64-5779-01	LUAD	0.502	TRUE	FALSE	TRUE	TRUE	FALSE	TRUE	TRUE	6092.09
TCGA-64-5781-01	LUAD	0.75	TRUE	TRUE	TRUE	TRUE	FALSE	TRUE	TRUE	803.713
TCGA-64-5815-01	LUAD	0.513	TRUE	FALSE	TRUE	TRUE	FALSE	TRUE	TRUE	895.718
TCGA-66-2727-01	LUSC	0.403	TRUE	TRUE	TRUE	TRUE	FALSE	TRUE	TRUE	4489.37
TCGA-66-2734-01	LUSC	0.401	TRUE	TRUE	TRUE	TRUE	FALSE	TRUE	TRUE	884.773
TCGA-66-2737-01	LUSC	0.421	TRUE	FALSE	TRUE	FALSE	FALSE	TRUE	TRUE	3516.82
TCGA-66-2742-01	LUSC	0.352	TRUE	TRUE	TRUE	TRUE	FALSE	TRUE	TRUE	7024.4
TCGA-66-2744-01	LUSC	0.744	TRUE	TRUE	TRUE	TRUE	FALSE	TRUE	TRUE	5147.41
TCGA-66-2753-01	LUSC	0.325	TRUE	FALSE	TRUE	FALSE	FALSE	TRUE	TRUE	4315.1
TCGA-66-2754-01	LUSC	0.172	TRUE	TRUE	TRUE	TRUE	FALSE	TRUE	TRUE	4787.54
TCGA-66-2755-01	LUSC	0.775	TRUE	TRUE	TRUE	TRUE	FALSE	TRUE	TRUE	2364.56
TCGA-66-2756-01	LUSC	0.292	TRUE	TRUE	TRUE	TRUE	FALSE	TRUE	TRUE	16931.9
TCGA-66-2757-01	LUSC	0.526	TRUE	TRUE	TRUE	TRUE	FALSE	TRUE	TRUE	7423.92
TCGA-66-2758-01	LUSC	0.563	TRUE	TRUE	TRUE	TRUE	FALSE	TRUE	TRUE	5707.16
TCGA-66-2759-01	LUSC	0.438	TRUE	TRUE	TRUE	TRUE	FALSE	FALSE	TRUE	7756.34
TCGA-66-2763-01	LUSC	0.491	TRUE	TRUE	TRUE	TRUE	FALSE	FALSE	TRUE	6078.13
TCGA-66-2765-01	LUSC	0.671	TRUE	TRUE	TRUE	TRUE	FALSE	TRUE	TRUE	2573.77
TCGA-66-2766-01	LUSC	0.267	TRUE	TRUE	TRUE	TRUE	FALSE	TRUE	TRUE	8072.83
TCGA-66-2767-01	LUSC	0.764	TRUE	TRUE	TRUE	TRUE	FALSE	TRUE	TRUE	3054.49
TCGA-66-2768-01	LUSC	0.606	TRUE	TRUE	TRUE	TRUE	FALSE	TRUE	TRUE	3492.7
TCGA-66-2769-01	LUSC	0.588	TRUE	FALSE	TRUE	FALSE	FALSE	TRUE	TRUE	3285.25
TCGA-66-2770-01	LUSC	0.503	TRUE	TRUE	TRUE	TRUE	FALSE	TRUE	TRUE	2708.98
TCGA-66-2771-01	LUSC	0.736	TRUE	TRUE	TRUE	TRUE	FALSE	TRUE	TRUE	1791.74
TCGA-66-2773-01	LUSC	0.423	TRUE	TRUE	TRUE	TRUE	FALSE	TRUE	TRUE	2855.14
TCGA-66-2777-01	LUSC	0.339	TRUE	TRUE	TRUE	TRUE	FALSE	TRUE	TRUE	4121.39
TCGA-66-2778-01	LUSC	0.44	TRUE	TRUE	TRUE	TRUE	FALSE	TRUE	TRUE	1220.32
TCGA-66-2780-01	LUSC	0.495	TRUE	TRUE	TRUE	TRUE	FALSE	TRUE	TRUE	2466.5
TCGA-66-2781-01	LUSC	0.312	TRUE	TRUE	TRUE	TRUE	FALSE	TRUE	TRUE	5543.76
TCGA-66-2782-01	LUSC	0.538	TRUE	TRUE	TRUE	TRUE	FALSE	TRUE	TRUE	2189.76
TCGA-66-2783-01	LUSC	0.305	TRUE	TRUE	TRUE	TRUE	FALSE	TRUE	TRUE	6094.75
TCGA-66-2785-01	LUSC	0.882	TRUE	TRUE	TRUE	TRUE	FALSE	TRUE	TRUE	4302.95
TCGA-66-2786-01	LUSC	0.622	TRUE	TRUE	TRUE	TRUE	FALSE	TRUE	TRUE	3853.54
TCGA-66-2787-01	LUSC	0.443	TRUE	TRUE	TRUE	TRUE	FALSE	TRUE	TRUE	3194.45
TCGA-66-2788-01	LUSC	0.538	TRUE	TRUE	TRUE	TRUE	FALSE	TRUE	TRUE	970.111
TCGA-66-2789-01	LUSC	0.329	TRUE	TRUE	TRUE	TRUE	FALSE	TRUE	TRUE	4879.89
TCGA-66-2790-01	LUSC	0.6	TRUE	FALSE	TRUE	FALSE	FALSE	TRUE	TRUE	4178.49
TCGA-66-2791-01	LUSC	0.589	TRUE	TRUE	TRUE	TRUE	FALSE	TRUE	TRUE	2508.54
TCGA-66-2792-01	LUSC	0.225	TRUE	TRUE	TRUE	TRUE	FALSE	TRUE	TRUE	6999.6
TCGA-66-2793-01	LUSC	0.108	TRUE	TRUE	TRUE	TRUE	FALSE	TRUE	TRUE	11883.5
TCGA-66-2794-01	LUSC	0.705	TRUE	TRUE	TRUE	TRUE	FALSE	TRUE	TRUE	6769.48
TCGA-66-2795-01	LUSC	0.434	TRUE	TRUE	TRUE	TRUE	FALSE	TRUE	TRUE	10634.5
TCGA-66-2800-01	LUSC	0.35	TRUE	TRUE	TRUE	TRUE	FALSE	TRUE	TRUE	7069.75
TCGA-67-3770-01	LUAD	0.677	TRUE	FALSE	TRUE	TRUE	FALSE	TRUE	TRUE	4877.96
TCGA-67-3771-01	LUAD	0.58	TRUE	TRUE	TRUE	TRUE	FALSE	FALSE	TRUE	4799.88
TCGA-67-3772-01	LUAD	0.635	TRUE	TRUE	TRUE	TRUE	FALSE	TRUE	TRUE	1865.56
TCGA-67-3773-01	LUAD	0.807	TRUE	TRUE	TRUE	TRUE	FALSE	TRUE	TRUE	3372.6
TCGA-67-3774-01	LUAD	0.633	TRUE	TRUE	TRUE	TRUE	FALSE	TRUE	TRUE	1737.26
TCGA-67-4679-01	LUAD	0.474	TRUE	FALSE	TRUE	TRUE	FALSE	TRUE	FALSE	2059.48
TCGA-67-6215-01	LUAD	0.38	TRUE	TRUE	TRUE	TRUE	FALSE	TRUE	TRUE	4965.4
TCGA-67-6216-01	LUAD	0.605	TRUE	TRUE	TRUE	TRUE	FALSE	TRUE	TRUE	472.932
TCGA-67-6217-01	LUAD	0.717	TRUE	TRUE	TRUE	TRUE	FALSE	TRUE	TRUE	2976.06
TCGA-68-7755-01	LUSC	0.212	TRUE	FALSE	TRUE	FALSE	FALSE	TRUE	TRUE	5951.54
TCGA-68-7756-01	LUSC	0.305	TRUE	FALSE	TRUE	FALSE	FALSE	TRUE	TRUE	1271.56
TCGA-68-7757-01	LUSC	0.351	TRUE	FALSE	TRUE	FALSE	FALSE	TRUE	TRUE	633.741
TCGA-68-8250-01	LUSC	0.472	TRUE	FALSE	TRUE	FALSE	FALSE	TRUE	TRUE	3702.38
TCGA-68-8251-01	LUSC	0.555	TRUE	FALSE	TRUE	FALSE	FALSE	TRUE	TRUE	1370.7
TCGA-68-A59I-01	LUSC	0.422	TRUE	FALSE	TRUE	FALSE	FALSE	TRUE	TRUE	1616.59
TCGA-68-A59J-01	LUSC	0.666	TRUE	FALSE	TRUE	FALSE	FALSE	FALSE	TRUE	7262.93
TCGA-69-7760-01	LUAD	0.218	TRUE	TRUE	TRUE	FALSE	FALSE	TRUE	TRUE	6853.29
TCGA-69-7761-01	LUAD	0.784	TRUE	TRUE	TRUE	FALSE	FALSE	TRUE	TRUE	836.946
TCGA-69-7763-01	LUAD	0.404	TRUE	TRUE	TRUE	FALSE	FALSE	FALSE	TRUE	1205.57
TCGA-69-7764-01	LUAD	0.486	TRUE	TRUE	TRUE	FALSE	FALSE	TRUE	TRUE	4840.9
TCGA-69-7765-01	LUAD	0.534	TRUE	TRUE	TRUE	FALSE	FALSE	TRUE	TRUE	1196.84
TCGA-69-7973-01	LUAD	0.337	TRUE	FALSE	TRUE	FALSE	FALSE	TRUE	TRUE	4158.27
TCGA-69-7974-01	LUAD	0.684	TRUE	FALSE	TRUE	FALSE	FALSE	TRUE	TRUE	1644.08
TCGA-69-7978-01	LUAD	0.706	TRUE	FALSE	TRUE	FALSE	FALSE	TRUE	TRUE	664.365
TCGA-69-7979-01	LUAD	0.325	TRUE	FALSE	TRUE	FALSE	FALSE	TRUE	TRUE	10368.6
TCGA-69-7980-01	LUAD	0.66	TRUE	TRUE	TRUE	FALSE	FALSE	TRUE	TRUE	6565.27
TCGA-69-8253-01	LUAD	0.33	TRUE	FALSE	TRUE	FALSE	FALSE	TRUE	TRUE	1666.5
TCGA-69-8254-01	LUAD	0.628	TRUE	FALSE	TRUE	FALSE	FALSE	TRUE	TRUE	202.705
TCGA-69-8255-01	LUAD	0.702	TRUE	FALSE	TRUE	FALSE	FALSE	TRUE	TRUE	3792.44
TCGA-69-8453-01	LUAD	0.694	TRUE	FALSE	TRUE	FALSE	FALSE	FALSE	TRUE	526.491
TCGA-69-A59K-01	LUAD	0.636	TRUE	FALSE	TRUE	FALSE	FALSE	TRUE	TRUE	5640.11
TCGA-6A-AB49-01	LUSC	0.263	TRUE	FALSE	TRUE	FALSE	FALSE	TRUE	FALSE	6765.5
TCGA-6D-AA2E-01	KIRC	0.388	TRUE	FALSE	TRUE	FALSE	FALSE	TRUE	TRUE	0.780365
TCGA-70-6722-01	LUSC	0.544	TRUE	TRUE	TRUE	TRUE	FALSE	TRUE	FALSE	2119.73
TCGA-70-6723-01	LUSC	0.187	TRUE	TRUE	TRUE	TRUE	FALSE	TRUE	FALSE	13096.1
TCGA-71-6725-01	LUAD	0.248	TRUE	TRUE	TRUE	TRUE	FALSE	TRUE	TRUE	7401
TCGA-71-8520-01	LUAD	0.454	TRUE	FALSE	FALSE	FALSE	FALSE	TRUE	TRUE	NA
TCGA-73-4658-01	LUAD	0.661	TRUE	TRUE	TRUE	TRUE	FALSE	TRUE	TRUE	725.361
TCGA-73-4659-01	LUAD	0.3	TRUE	TRUE	TRUE	TRUE	FALSE	FALSE	TRUE	1196.44
TCGA-73-4662-01	LUAD	0.65	TRUE	TRUE	TRUE	TRUE	FALSE	FALSE	TRUE	4459.84
TCGA-73-4666-01	LUAD	0.825	TRUE	FALSE	TRUE	TRUE	FALSE	TRUE	TRUE	3321.94
TCGA-73-4668-01	LUAD	0.386	TRUE	FALSE	TRUE	TRUE	FALSE	TRUE	TRUE	3251.15
TCGA-73-4670-01	LUAD	0.347	TRUE	FALSE	TRUE	TRUE	FALSE	TRUE	TRUE	4671.79
TCGA-73-4675-01	LUAD	0.248	TRUE	TRUE	TRUE	TRUE	FALSE	TRUE	TRUE	2571.67
TCGA-73-4676-01	LUAD	0.353	TRUE	TRUE	TRUE	FALSE	FALSE	TRUE	TRUE	8404.58
TCGA-73-4677-01	LUAD	0.445	TRUE	FALSE	TRUE	TRUE	FALSE	TRUE	TRUE	2775
TCGA-73-7498-01	LUAD	0.466	TRUE	TRUE	TRUE	FALSE	FALSE	TRUE	TRUE	1966.79
TCGA-73-7499-01	LUAD	0.795	TRUE	TRUE	TRUE	FALSE	FALSE	TRUE	TRUE	3461.94
TCGA-73-A9RS-01	LUAD	0.305	TRUE	FALSE	TRUE	FALSE	FALSE	TRUE	TRUE	3701.87
TCGA-75-5122-01	LUAD	0.883	TRUE	TRUE	TRUE	TRUE	FALSE	TRUE	FALSE	2174.51
TCGA-75-5125-01	LUAD	0.635	TRUE	FALSE	TRUE	TRUE	FALSE	TRUE	FALSE	1614.25
TCGA-75-5126-01	LUAD	0.791	TRUE	TRUE	TRUE	TRUE	FALSE	TRUE	FALSE	485.182
TCGA-75-5146-01	LUAD	0.505	TRUE	TRUE	TRUE	TRUE	FALSE	TRUE	FALSE	2569.04
TCGA-75-5147-01	LUAD	0.64	TRUE	TRUE	TRUE	TRUE	FALSE	TRUE	FALSE	3055.67
TCGA-75-6203-01	LUAD	0.676	TRUE	TRUE	TRUE	TRUE	FALSE	FALSE	FALSE	499.945
TCGA-75-6205-01	LUAD	0.793	TRUE	TRUE	TRUE	TRUE	FALSE	TRUE	FALSE	603.158
TCGA-75-6206-01	LUAD	0.317	TRUE	FALSE	TRUE	TRUE	FALSE	TRUE	FALSE	4153.55
TCGA-75-6207-01	LUAD	0.33	TRUE	TRUE	TRUE	TRUE	FALSE	TRUE	FALSE	5354.81
TCGA-75-6211-01	LUAD	0.324	TRUE	TRUE	TRUE	TRUE	FALSE	TRUE	FALSE	2622.44
TCGA-75-6212-01	LUAD	0.632	TRUE	TRUE	TRUE	TRUE	FALSE	TRUE	FALSE	1082.57
TCGA-75-6214-01	LUAD	0.428	TRUE	TRUE	TRUE	FALSE	FALSE	TRUE	FALSE	4255.28
TCGA-75-7025-01	LUAD	0.544	TRUE	TRUE	TRUE	FALSE	FALSE	TRUE	FALSE	1281.38
TCGA-75-7027-01	LUAD	0.297	TRUE	TRUE	TRUE	FALSE	FALSE	TRUE	FALSE	4764.32
TCGA-75-7030-01	LUAD	0.603	TRUE	TRUE	TRUE	FALSE	FALSE	TRUE	FALSE	31.6268
TCGA-75-7031-01	LUAD	0.671	TRUE	TRUE	TRUE	FALSE	FALSE	TRUE	FALSE	9367.49
TCGA-76-4925-01	GBM	0.062	TRUE	TRUE	TRUE	TRUE	FALSE	TRUE	TRUE	4122.38
TCGA-76-4926-01	GBM	0.102	TRUE	TRUE	TRUE	TRUE	FALSE	TRUE	TRUE	1525.8
TCGA-76-4927-01	GBM	0.112	TRUE	TRUE	FALSE	TRUE	FALSE	TRUE	TRUE	NA
TCGA-76-4928-01	GBM	0.146	TRUE	TRUE	TRUE	TRUE	FALSE	TRUE	TRUE	992.341
TCGA-76-4929-01	GBM	0.104	TRUE	TRUE	TRUE	TRUE	FALSE	TRUE	TRUE	4481.95
TCGA-76-4931-01	GBM	0.082	TRUE	TRUE	TRUE	TRUE	FALSE	TRUE	TRUE	2698.51
TCGA-76-4932-01	GBM	0.092	TRUE	TRUE	FALSE	FALSE	FALSE	TRUE	TRUE	NA
TCGA-77-6842-01	LUSC	0.732	TRUE	FALSE	TRUE	FALSE	FALSE	TRUE	TRUE	4820.72
TCGA-77-6843-01	LUSC	0.086	TRUE	FALSE	TRUE	FALSE	FALSE	TRUE	TRUE	5812.54
TCGA-77-6844-01	LUSC	0.329	TRUE	FALSE	TRUE	FALSE	FALSE	TRUE	TRUE	4393.74
TCGA-77-6845-01	LUSC	0.061	TRUE	FALSE	TRUE	FALSE	FALSE	TRUE	TRUE	11611.6
TCGA-77-7138-01	LUSC	0.257	TRUE	FALSE	TRUE	FALSE	FALSE	TRUE	TRUE	5108.25
TCGA-77-7139-01	LUSC	0.257	TRUE	FALSE	TRUE	FALSE	FALSE	TRUE	TRUE	6870.78
TCGA-77-7140-01	LUSC	0.136	TRUE	FALSE	TRUE	FALSE	FALSE	TRUE	TRUE	16375.3
TCGA-77-7141-01	LUSC	0.185	TRUE	FALSE	TRUE	FALSE	FALSE	TRUE	TRUE	9040.8
TCGA-77-7142-01	LUSC	0.38	TRUE	FALSE	TRUE	FALSE	FALSE	TRUE	TRUE	6820.22
TCGA-77-7335-01	LUSC	0.782	TRUE	FALSE	TRUE	FALSE	FALSE	TRUE	TRUE	1771.83
TCGA-77-7337-01	LUSC	0.412	TRUE	FALSE	TRUE	FALSE	FALSE	TRUE	TRUE	3343.31
TCGA-77-7338-01	LUSC	0.291	TRUE	FALSE	TRUE	FALSE	FALSE	TRUE	TRUE	2446.03
TCGA-77-7463-01	LUSC	0.198	TRUE	FALSE	TRUE	FALSE	FALSE	TRUE	TRUE	5150.74
TCGA-77-7465-01	LUSC	0.669	TRUE	FALSE	TRUE	FALSE	FALSE	TRUE	TRUE	4552.22
TCGA-77-8007-01	LUSC	0.634	TRUE	FALSE	TRUE	FALSE	FALSE	TRUE	TRUE	1366.88
TCGA-77-8008-01	LUSC	0.484	TRUE	FALSE	TRUE	FALSE	FALSE	TRUE	TRUE	1067.53
TCGA-77-8009-01	LUSC	0.204	TRUE	FALSE	TRUE	FALSE	FALSE	TRUE	TRUE	12558.8
TCGA-77-8128-01	LUSC	0.095	TRUE	FALSE	TRUE	FALSE	FALSE	FALSE	TRUE	5172.64
TCGA-77-8130-01	LUSC	0.262	TRUE	FALSE	TRUE	FALSE	FALSE	TRUE	TRUE	2503.02
TCGA-77-8131-01	LUSC	0.741	TRUE	FALSE	TRUE	FALSE	FALSE	TRUE	TRUE	320.692
TCGA-77-8133-01	LUSC	0.448	TRUE	FALSE	TRUE	FALSE	FALSE	FALSE	TRUE	3811.81
TCGA-77-8136-01	LUSC	0.739	TRUE	FALSE	TRUE	FALSE	FALSE	FALSE	TRUE	902.566
TCGA-77-8138-01	LUSC	0.392	TRUE	FALSE	TRUE	FALSE	FALSE	TRUE	TRUE	989.202
TCGA-77-8139-01	LUSC	0.32	TRUE	FALSE	TRUE	FALSE	FALSE	FALSE	TRUE	1634.69
TCGA-77-8140-01	LUSC	0.232	TRUE	FALSE	TRUE	FALSE	FALSE	TRUE	TRUE	2782.84
TCGA-77-8143-01	LUSC	0.35	TRUE	FALSE	TRUE	FALSE	FALSE	TRUE	TRUE	4965.21
TCGA-77-8144-01	LUSC	0.339	TRUE	FALSE	TRUE	FALSE	FALSE	TRUE	TRUE	3358.72
TCGA-77-8145-01	LUSC	0.2	TRUE	FALSE	TRUE	FALSE	FALSE	TRUE	TRUE	2320.87
TCGA-77-8146-01	LUSC	0.294	TRUE	FALSE	FALSE	FALSE	FALSE	TRUE	TRUE	NA
TCGA-77-8148-01	LUSC	0.343	TRUE	FALSE	TRUE	FALSE	FALSE	FALSE	TRUE	6673.01
TCGA-77-8150-01	LUSC	0.441	TRUE	FALSE	TRUE	FALSE	FALSE	FALSE	TRUE	4858.82
TCGA-77-8153-01	LUSC	0.098	TRUE	FALSE	TRUE	FALSE	FALSE	TRUE	TRUE	7597.69
TCGA-77-8154-01	LUSC	0.142	TRUE	FALSE	TRUE	FALSE	FALSE	TRUE	TRUE	4049.18
TCGA-77-8156-01	LUSC	0.608	TRUE	FALSE	TRUE	FALSE	FALSE	TRUE	TRUE	2030.34
TCGA-77-A5FZ-01	LUSC	0.804	TRUE	FALSE	TRUE	FALSE	FALSE	TRUE	TRUE	1.95036
TCGA-77-A5G1-01	LUSC	0.475	TRUE	FALSE	TRUE	FALSE	FALSE	TRUE	TRUE	509.976
TCGA-77-A5G3-01	LUSC	0.246	TRUE	FALSE	TRUE	FALSE	FALSE	TRUE	TRUE	9042.28
TCGA-77-A5G6-01	LUSC	0.186	TRUE	FALSE	TRUE	FALSE	FALSE	TRUE	TRUE	9253.57
TCGA-77-A5G7-01	LUSC	0.253	TRUE	FALSE	TRUE	FALSE	FALSE	TRUE	TRUE	2276.37
TCGA-77-A5G8-01	LUSC	0.293	TRUE	FALSE	TRUE	FALSE	FALSE	TRUE	TRUE	6029.85
TCGA-77-A5GA-01	LUSC	0.205	TRUE	FALSE	TRUE	FALSE	FALSE	TRUE	TRUE	3267.92
TCGA-77-A5GB-01	LUSC	0.545	TRUE	FALSE	TRUE	FALSE	FALSE	TRUE	TRUE	410.242
TCGA-77-A5GF-01	LUSC	0.323	TRUE	FALSE	TRUE	FALSE	FALSE	TRUE	TRUE	7058.11
TCGA-77-A5GH-01	LUSC	0.784	TRUE	FALSE	TRUE	FALSE	FALSE	TRUE	TRUE	2999.78
TCGA-78-7143-01	LUAD	0.451	TRUE	TRUE	TRUE	FALSE	FALSE	TRUE	TRUE	2072.34
TCGA-78-7145-01	LUAD	0.319	TRUE	TRUE	TRUE	FALSE	FALSE	TRUE	TRUE	6217.99
TCGA-78-7146-01	LUAD	0.415	TRUE	FALSE	TRUE	FALSE	FALSE	TRUE	TRUE	6405.44
TCGA-78-7147-01	LUAD	0.583	TRUE	TRUE	TRUE	FALSE	FALSE	TRUE	TRUE	3703.75
TCGA-78-7148-01	LUAD	0.443	TRUE	TRUE	TRUE	FALSE	FALSE	TRUE	TRUE	1399
TCGA-78-7149-01	LUAD	0.253	TRUE	TRUE	TRUE	FALSE	FALSE	TRUE	TRUE	3478.43
TCGA-78-7150-01	LUAD	0.238	TRUE	TRUE	TRUE	FALSE	FALSE	TRUE	TRUE	2458.06
TCGA-78-7152-01	LUAD	0.496	TRUE	TRUE	TRUE	FALSE	FALSE	TRUE	TRUE	1030.68
TCGA-78-7153-01	LUAD	0.304	TRUE	TRUE	TRUE	FALSE	FALSE	TRUE	TRUE	5262.55
TCGA-78-7154-01	LUAD	0.273	TRUE	TRUE	TRUE	FALSE	FALSE	TRUE	TRUE	6799.78
TCGA-78-7155-01	LUAD	0.167	TRUE	TRUE	TRUE	FALSE	FALSE	TRUE	TRUE	8900.73
TCGA-78-7156-01	LUAD	0.284	TRUE	TRUE	TRUE	FALSE	FALSE	TRUE	TRUE	2043.55
TCGA-78-7158-01	LUAD	0.389	TRUE	TRUE	TRUE	FALSE	FALSE	TRUE	TRUE	4199.54
TCGA-78-7159-01	LUAD	0.374	TRUE	TRUE	TRUE	FALSE	FALSE	TRUE	TRUE	2990.39
TCGA-78-7160-01	LUAD	0.578	TRUE	TRUE	TRUE	FALSE	FALSE	FALSE	TRUE	463.275
TCGA-78-7161-01	LUAD	0.279	TRUE	TRUE	TRUE	FALSE	FALSE	TRUE	TRUE	5944.39
TCGA-78-7162-01	LUAD	0.55	TRUE	TRUE	TRUE	FALSE	FALSE	TRUE	TRUE	403.48
TCGA-78-7163-01	LUAD	0.278	TRUE	TRUE	TRUE	FALSE	FALSE	TRUE	TRUE	7737.62
TCGA-78-7166-01	LUAD	0.384	TRUE	TRUE	TRUE	FALSE	FALSE	TRUE	TRUE	1622.6
TCGA-78-7167-01	LUAD	0.215	TRUE	TRUE	TRUE	FALSE	FALSE	TRUE	TRUE	4239.08
TCGA-78-7220-01	LUAD	0.299	TRUE	FALSE	TRUE	FALSE	FALSE	FALSE	TRUE	5256.9
TCGA-78-7535-01	LUAD	0.307	TRUE	TRUE	TRUE	FALSE	FALSE	TRUE	TRUE	4090.86
TCGA-78-7536-01	LUAD	0.47	TRUE	TRUE	TRUE	FALSE	FALSE	TRUE	TRUE	8127.19
TCGA-78-7537-01	LUAD	0.337	TRUE	TRUE	TRUE	FALSE	FALSE	FALSE	TRUE	3062.96
TCGA-78-7539-01	LUAD	0.802	TRUE	TRUE	TRUE	FALSE	FALSE	TRUE	TRUE	6314.34
TCGA-78-7540-01	LUAD	0.433	TRUE	TRUE	TRUE	FALSE	FALSE	TRUE	TRUE	2502.06
TCGA-78-7542-01	LUAD	0.574	TRUE	TRUE	TRUE	FALSE	FALSE	TRUE	TRUE	3155.91
TCGA-78-7633-01	LUAD	0.212	TRUE	TRUE	TRUE	FALSE	FALSE	TRUE	TRUE	4810.52
TCGA-78-8640-01	LUAD	0.447	TRUE	FALSE	TRUE	FALSE	FALSE	FALSE	TRUE	2246.93
TCGA-78-8648-01	LUAD	0.752	TRUE	FALSE	TRUE	FALSE	FALSE	TRUE	TRUE	4.08328
TCGA-78-8655-01	LUAD	0.6	TRUE	FALSE	TRUE	FALSE	FALSE	FALSE	TRUE	3263.98
TCGA-78-8660-01	LUAD	0.61	TRUE	FALSE	TRUE	FALSE	FALSE	TRUE	TRUE	478.459
TCGA-78-8662-01	LUAD	0.243	TRUE	FALSE	TRUE	FALSE	FALSE	TRUE	TRUE	14232
TCGA-79-5596-01	LUSC	0.122	TRUE	FALSE	TRUE	FALSE	FALSE	TRUE	FALSE	4778.45
TCGA-80-5607-01	LUAD	0.69	TRUE	TRUE	TRUE	FALSE	FALSE	TRUE	FALSE	628.405
TCGA-80-5608-01	LUAD	0.553	TRUE	TRUE	TRUE	FALSE	FALSE	TRUE	FALSE	2658.55
TCGA-80-5611-01	LUAD	0.621	TRUE	FALSE	TRUE	TRUE	FALSE	TRUE	FALSE	4471.08
TCGA-83-5908-01	LUAD	0.869	TRUE	FALSE	TRUE	FALSE	FALSE	TRUE	TRUE	714.172
TCGA-85-6175-01	LUSC	0.601	TRUE	TRUE	TRUE	TRUE	FALSE	TRUE	TRUE	1855.57
TCGA-85-6560-01	LUSC	0.417	TRUE	TRUE	TRUE	TRUE	FALSE	TRUE	TRUE	2821.84
TCGA-85-6561-01	LUSC	0.545	TRUE	TRUE	TRUE	TRUE	FALSE	TRUE	TRUE	1822.04
TCGA-85-6798-01	LUSC	0.116	TRUE	FALSE	TRUE	FALSE	FALSE	TRUE	TRUE	5083.14
TCGA-85-7696-01	LUSC	0.322	TRUE	FALSE	TRUE	FALSE	FALSE	TRUE	TRUE	10954.2
TCGA-85-7697-01	LUSC	0.414	TRUE	FALSE	TRUE	FALSE	FALSE	TRUE	TRUE	1081.09
TCGA-85-7698-01	LUSC	0.441	TRUE	FALSE	TRUE	FALSE	FALSE	TRUE	TRUE	3528.86
TCGA-85-7699-01	LUSC	0.578	TRUE	FALSE	TRUE	FALSE	FALSE	TRUE	TRUE	4006.42
TCGA-85-7710-01	LUSC	0.543	TRUE	FALSE	TRUE	FALSE	FALSE	TRUE	FALSE	5055.2
TCGA-85-7843-01	LUSC	0.357	TRUE	FALSE	TRUE	FALSE	FALSE	TRUE	TRUE	6327.71
TCGA-85-7844-01	LUSC	0.278	TRUE	FALSE	TRUE	FALSE	FALSE	TRUE	TRUE	3374.92
TCGA-85-7950-01	LUSC	0.678	TRUE	FALSE	TRUE	FALSE	FALSE	TRUE	TRUE	4817.42
TCGA-85-8048-01	LUSC	0.737	TRUE	FALSE	TRUE	FALSE	FALSE	TRUE	TRUE	571.137
TCGA-85-8049-01	LUSC	0.592	TRUE	FALSE	TRUE	FALSE	FALSE	FALSE	TRUE	911.672
TCGA-85-8052-01	LUSC	0.194	TRUE	FALSE	TRUE	FALSE	FALSE	TRUE	TRUE	2621.23
TCGA-85-8070-01	LUSC	0.092	TRUE	FALSE	TRUE	FALSE	FALSE	TRUE	TRUE	10819.6
TCGA-85-8071-01	LUSC	0.307	TRUE	FALSE	TRUE	FALSE	FALSE	FALSE	TRUE	6313.37
TCGA-85-8072-01	LUSC	0.372	TRUE	FALSE	TRUE	FALSE	FALSE	TRUE	TRUE	4301.33
TCGA-85-8276-01	LUSC	0.582	TRUE	FALSE	TRUE	FALSE	FALSE	TRUE	TRUE	3366.08
TCGA-85-8277-01	LUSC	0.353	TRUE	FALSE	TRUE	FALSE	FALSE	TRUE	TRUE	5921.8
TCGA-85-8287-01	LUSC	0.6	TRUE	FALSE	TRUE	FALSE	FALSE	TRUE	TRUE	2830.15
TCGA-85-8288-01	LUSC	0.531	TRUE	FALSE	TRUE	FALSE	FALSE	TRUE	TRUE	2474.16
TCGA-85-8350-01	LUSC	0.445	TRUE	FALSE	TRUE	FALSE	FALSE	TRUE	TRUE	4766.95
TCGA-85-8351-01	LUSC	0.311	TRUE	FALSE	TRUE	FALSE	FALSE	TRUE	TRUE	3260.8
TCGA-85-8352-01	LUSC	0.135	TRUE	FALSE	TRUE	FALSE	FALSE	FALSE	TRUE	8878.89
TCGA-85-8353-01	LUSC	0.437	TRUE	FALSE	TRUE	FALSE	FALSE	FALSE	TRUE	1817.71
TCGA-85-8354-01	LUSC	0.187	TRUE	FALSE	TRUE	FALSE	FALSE	TRUE	TRUE	14330.5
TCGA-85-8355-01	LUSC	0.706	TRUE	FALSE	TRUE	FALSE	FALSE	TRUE	TRUE	478.801
TCGA-85-8479-01	LUSC	0.118	TRUE	FALSE	TRUE	FALSE	FALSE	FALSE	TRUE	4645.52
TCGA-85-8481-01	LUSC	0.465	TRUE	FALSE	TRUE	FALSE	FALSE	FALSE	TRUE	1096.06
TCGA-85-8580-01	LUSC	0.339	TRUE	FALSE	TRUE	FALSE	FALSE	TRUE	TRUE	998.114
TCGA-85-8582-01	LUSC	0.427	TRUE	FALSE	TRUE	FALSE	FALSE	TRUE	TRUE	1234.49
TCGA-85-8584-01	LUSC	0.727	TRUE	FALSE	TRUE	FALSE	FALSE	FALSE	TRUE	3050.56
TCGA-85-8664-01	LUSC	0.148	TRUE	FALSE	TRUE	FALSE	FALSE	TRUE	TRUE	7233.87
TCGA-85-8666-01	LUSC	0.328	TRUE	FALSE	TRUE	FALSE	FALSE	TRUE	TRUE	1542.43
TCGA-85-A4CL-01	LUSC	0.474	TRUE	FALSE	TRUE	FALSE	FALSE	TRUE	TRUE	8517.93
TCGA-85-A4CN-01	LUSC	0.329	TRUE	FALSE	TRUE	FALSE	FALSE	FALSE	TRUE	4323.41
TCGA-85-A4JB-01	LUSC	0.285	TRUE	FALSE	TRUE	FALSE	FALSE	FALSE	TRUE	3289.23
TCGA-85-A4JC-01	LUSC	0.425	TRUE	FALSE	TRUE	FALSE	FALSE	TRUE	TRUE	1009.85
TCGA-85-A4PA-01	LUSC	0.874	TRUE	FALSE	TRUE	FALSE	FALSE	FALSE	TRUE	5.39226
TCGA-85-A4QQ-01	LUSC	0.259	TRUE	FALSE	TRUE	FALSE	FALSE	TRUE	TRUE	2647.65
TCGA-85-A4QR-01	LUSC	0.091	TRUE	FALSE	TRUE	FALSE	FALSE	TRUE	TRUE	7694.89
TCGA-85-A50M-01	LUSC	0.272	TRUE	FALSE	TRUE	FALSE	FALSE	TRUE	TRUE	2250.95
TCGA-85-A50Z-01	LUSC	0.415	TRUE	FALSE	TRUE	FALSE	FALSE	TRUE	TRUE	1450.8
TCGA-85-A510-01	LUSC	0.579	TRUE	FALSE	TRUE	FALSE	FALSE	TRUE	TRUE	6756.48
TCGA-85-A511-01	LUSC	0.458	TRUE	FALSE	TRUE	FALSE	FALSE	FALSE	TRUE	2009.9
TCGA-85-A512-01	LUSC	0.245	TRUE	FALSE	TRUE	FALSE	FALSE	TRUE	FALSE	9941.44
TCGA-85-A513-01	LUSC	0.784	TRUE	FALSE	TRUE	FALSE	FALSE	TRUE	TRUE	2074.93
TCGA-85-A53L-01	LUSC	0.265	TRUE	FALSE	TRUE	FALSE	FALSE	TRUE	TRUE	4282.64
TCGA-85-A5B5-01	LUSC	0.143	TRUE	FALSE	TRUE	FALSE	FALSE	TRUE	TRUE	11415.6
TCGA-86-6562-01	LUAD	0.335	TRUE	TRUE	TRUE	TRUE	FALSE	TRUE	TRUE	5208.08
TCGA-86-6851-01	LUAD	0.866	TRUE	TRUE	TRUE	FALSE	FALSE	TRUE	TRUE	1709.68
TCGA-86-7701-01	LUAD	0.608	TRUE	FALSE	TRUE	FALSE	FALSE	TRUE	TRUE	2073.93
TCGA-86-7711-01	LUAD	0.499	TRUE	FALSE	TRUE	FALSE	FALSE	TRUE	TRUE	1539.69
TCGA-86-7713-01	LUAD	0.22	TRUE	TRUE	TRUE	FALSE	FALSE	TRUE	TRUE	7091.53
TCGA-86-7714-01	LUAD	0.411	TRUE	TRUE	TRUE	FALSE	FALSE	TRUE	TRUE	379.709
TCGA-86-7953-01	LUAD	0.508	TRUE	FALSE	TRUE	FALSE	FALSE	TRUE	TRUE	2083.48
TCGA-86-7954-01	LUAD	0.764	TRUE	FALSE	TRUE	FALSE	FALSE	TRUE	FALSE	2962.89
TCGA-86-7955-01	LUAD	0.156	TRUE	FALSE	TRUE	FALSE	FALSE	TRUE	TRUE	7268.76
TCGA-86-8054-01	LUAD	0.16	TRUE	FALSE	TRUE	FALSE	FALSE	FALSE	TRUE	5798.11
TCGA-86-8055-01	LUAD	0.399	TRUE	FALSE	TRUE	FALSE	FALSE	TRUE	TRUE	2262.44
TCGA-86-8056-01	LUAD	0.452	TRUE	FALSE	TRUE	FALSE	FALSE	TRUE	FALSE	1706.44
TCGA-86-8073-01	LUAD	0.327	TRUE	FALSE	TRUE	FALSE	FALSE	TRUE	TRUE	962.445
TCGA-86-8074-01	LUAD	0.57	TRUE	FALSE	TRUE	FALSE	FALSE	TRUE	TRUE	5898.92
TCGA-86-8075-01	LUAD	0.499	TRUE	FALSE	TRUE	FALSE	FALSE	TRUE	TRUE	2394.92
TCGA-86-8076-01	LUAD	0.702	TRUE	FALSE	TRUE	FALSE	FALSE	TRUE	TRUE	218.967
TCGA-86-8278-01	LUAD	0.508	TRUE	FALSE	TRUE	FALSE	FALSE	TRUE	TRUE	1239.86
TCGA-86-8279-01	LUAD	0.26	TRUE	FALSE	TRUE	FALSE	FALSE	TRUE	TRUE	8493.02
TCGA-86-8280-01	LUAD	0.754	TRUE	FALSE	TRUE	FALSE	FALSE	TRUE	TRUE	2240.74
TCGA-86-8281-01	LUAD	0.276	TRUE	FALSE	TRUE	FALSE	FALSE	TRUE	FALSE	2920.36
TCGA-86-8358-01	LUAD	0.343	TRUE	FALSE	TRUE	FALSE	FALSE	TRUE	TRUE	9122.63
TCGA-86-8359-01	LUAD	0.535	TRUE	FALSE	TRUE	FALSE	FALSE	TRUE	TRUE	3296.45
TCGA-86-8585-01	LUAD	0.658	TRUE	FALSE	TRUE	FALSE	FALSE	TRUE	TRUE	1910.54
TCGA-86-8668-01	LUAD	0.553	TRUE	FALSE	TRUE	FALSE	FALSE	FALSE	TRUE	3310.18
TCGA-86-8669-01	LUAD	0.497	TRUE	FALSE	TRUE	FALSE	FALSE	TRUE	TRUE	3804.89
TCGA-86-8671-01	LUAD	0.868	TRUE	FALSE	TRUE	FALSE	FALSE	TRUE	TRUE	85.7521
TCGA-86-8672-01	LUAD	0.701	TRUE	FALSE	TRUE	FALSE	FALSE	TRUE	TRUE	1231.19
TCGA-86-8673-01	LUAD	0.353	TRUE	FALSE	TRUE	FALSE	FALSE	TRUE	TRUE	5522.35
TCGA-86-8674-01	LUAD	0.204	TRUE	FALSE	TRUE	FALSE	FALSE	TRUE	TRUE	1744.31
TCGA-86-A456-01	LUAD	0.642	TRUE	FALSE	TRUE	FALSE	FALSE	TRUE	TRUE	376.726
TCGA-86-A4D0-01	LUAD	0.28	TRUE	FALSE	TRUE	FALSE	FALSE	FALSE	TRUE	11471.5
TCGA-86-A4JF-01	LUAD	0.615	TRUE	FALSE	TRUE	FALSE	FALSE	FALSE	TRUE	1043.31
TCGA-86-A4P7-01	LUAD	0.648	TRUE	FALSE	TRUE	FALSE	FALSE	TRUE	TRUE	268.224
TCGA-86-A4P8-01	LUAD	0.787	TRUE	FALSE	TRUE	FALSE	FALSE	TRUE	TRUE	1.06796
TCGA-90-6837-01	LUSC	0.514	TRUE	FALSE	TRUE	FALSE	FALSE	TRUE	TRUE	0.533473
TCGA-90-7766-01	LUSC	0.62	TRUE	FALSE	TRUE	FALSE	FALSE	TRUE	TRUE	3506.06
TCGA-90-7767-01	LUSC	0.628	TRUE	FALSE	TRUE	FALSE	FALSE	TRUE	TRUE	5857.68
TCGA-90-7769-01	LUSC	0.127	TRUE	FALSE	TRUE	FALSE	FALSE	TRUE	TRUE	8818.92
TCGA-90-7964-01	LUSC	0.26	TRUE	FALSE	TRUE	FALSE	FALSE	TRUE	TRUE	3406.93
TCGA-90-A4ED-01	LUSC	0.31	TRUE	FALSE	TRUE	FALSE	FALSE	FALSE	TRUE	1404.89
TCGA-90-A4EE-01	LUSC	0.796	TRUE	FALSE	TRUE	FALSE	FALSE	FALSE	TRUE	3814.98
TCGA-90-A59Q-01	LUSC	0.813	TRUE	FALSE	TRUE	FALSE	FALSE	TRUE	TRUE	1184.89
TCGA-91-6828-01	LUAD	0.646	TRUE	TRUE	TRUE	TRUE	FALSE	TRUE	TRUE	4493.88
TCGA-91-6829-01	LUAD	0.311	TRUE	TRUE	TRUE	TRUE	FALSE	TRUE	TRUE	3142.15
TCGA-91-6830-01	LUAD	0.591	TRUE	FALSE	TRUE	FALSE	FALSE	FALSE	TRUE	555.003
TCGA-91-6831-01	LUAD	0.398	TRUE	FALSE	TRUE	TRUE	FALSE	TRUE	TRUE	4235.57
TCGA-91-6835-01	LUAD	0.738	TRUE	TRUE	TRUE	TRUE	FALSE	TRUE	TRUE	1035.55
TCGA-91-6836-01	LUAD	0.384	TRUE	FALSE	TRUE	TRUE	FALSE	TRUE	TRUE	12802.6
TCGA-91-6840-01	LUAD	0.628	TRUE	TRUE	TRUE	FALSE	FALSE	TRUE	TRUE	6401.69
TCGA-91-6847-01	LUAD	0.117	TRUE	TRUE	TRUE	FALSE	FALSE	TRUE	TRUE	8623.43
TCGA-91-6848-01	LUAD	0.586	TRUE	FALSE	TRUE	FALSE	FALSE	TRUE	TRUE	1769.57
TCGA-91-6849-01	LUAD	0.594	TRUE	TRUE	TRUE	FALSE	FALSE	TRUE	TRUE	1423.57
TCGA-91-7771-01	LUAD	0.668	TRUE	TRUE	TRUE	FALSE	FALSE	TRUE	TRUE	3355.73
TCGA-91-8496-01	LUAD	0.636	TRUE	FALSE	TRUE	FALSE	FALSE	TRUE	TRUE	2387.2
TCGA-91-8497-01	LUAD	0.635	TRUE	FALSE	TRUE	FALSE	FALSE	TRUE	TRUE	596.621
TCGA-91-8499-01	LUAD	0.561	TRUE	FALSE	TRUE	FALSE	FALSE	TRUE	TRUE	7245.66
TCGA-91-A4BC-01	LUAD	0.765	TRUE	FALSE	TRUE	FALSE	FALSE	TRUE	TRUE	620.282
TCGA-91-A4BD-01	LUAD	0.551	TRUE	FALSE	TRUE	FALSE	FALSE	TRUE	TRUE	658.912
TCGA-92-7340-01	LUSC	0.564	TRUE	FALSE	TRUE	FALSE	FALSE	TRUE	TRUE	1460.85
TCGA-92-7341-01	LUSC	0.191	TRUE	FALSE	TRUE	FALSE	FALSE	TRUE	TRUE	6265.6
TCGA-92-8063-01	LUSC	0.262	TRUE	FALSE	TRUE	FALSE	FALSE	FALSE	TRUE	3513.38
TCGA-92-8064-01	LUSC	0.778	TRUE	FALSE	TRUE	FALSE	FALSE	FALSE	TRUE	3348.28
TCGA-92-8065-01	LUSC	0.577	TRUE	FALSE	TRUE	FALSE	FALSE	FALSE	TRUE	2678.27
TCGA-93-7347-01	LUAD	0.734	TRUE	TRUE	TRUE	FALSE	FALSE	TRUE	TRUE	523.669
TCGA-93-7348-01	LUAD	0.497	TRUE	TRUE	TRUE	FALSE	FALSE	TRUE	TRUE	623.461
TCGA-93-8067-01	LUAD	0.346	TRUE	FALSE	TRUE	FALSE	FALSE	FALSE	TRUE	2507.16
TCGA-93-A4JN-01	LUAD	0.495	TRUE	FALSE	TRUE	FALSE	FALSE	TRUE	TRUE	2814.44
TCGA-93-A4JO-01	LUAD	0.677	TRUE	FALSE	TRUE	FALSE	FALSE	TRUE	TRUE	558.771
TCGA-93-A4JP-01	LUAD	0.525	TRUE	FALSE	TRUE	FALSE	FALSE	TRUE	TRUE	893.67
TCGA-93-A4JQ-01	LUAD	0.669	TRUE	FALSE	TRUE	FALSE	FALSE	TRUE	TRUE	402.95
TCGA-94-7033-01	LUSC	0.434	TRUE	FALSE	TRUE	FALSE	FALSE	TRUE	TRUE	2126.61
TCGA-94-7557-01	LUSC	0.224	TRUE	FALSE	TRUE	FALSE	FALSE	TRUE	TRUE	3309.99
TCGA-94-7943-01	LUSC	0.307	TRUE	FALSE	TRUE	FALSE	FALSE	TRUE	TRUE	6578.85
TCGA-94-8035-01	LUSC	0.207	TRUE	FALSE	TRUE	FALSE	FALSE	TRUE	TRUE	2293
TCGA-94-8490-01	LUSC	0.113	TRUE	FALSE	TRUE	FALSE	FALSE	FALSE	TRUE	7102.97
TCGA-94-8491-01	LUSC	0.429	TRUE	FALSE	TRUE	FALSE	FALSE	FALSE	TRUE	3082.57
TCGA-94-A4VJ-01	LUSC	0.4	TRUE	FALSE	TRUE	FALSE	FALSE	TRUE	TRUE	5566.15
TCGA-94-A5I4-01	LUSC	0.19	TRUE	FALSE	TRUE	FALSE	FALSE	FALSE	FALSE	16107
TCGA-94-A5I6-01	LUSC	0.126	TRUE	FALSE	TRUE	FALSE	FALSE	TRUE	TRUE	2648.94
TCGA-95-7039-01	LUAD	0.581	TRUE	TRUE	TRUE	FALSE	FALSE	TRUE	TRUE	4567.1
TCGA-95-7043-01	LUAD	0.217	TRUE	TRUE	TRUE	FALSE	FALSE	TRUE	TRUE	9022.45
TCGA-95-7562-01	LUAD	0.472	TRUE	FALSE	TRUE	FALSE	FALSE	TRUE	TRUE	8722.75
TCGA-95-7567-01	LUAD	0.548	TRUE	TRUE	TRUE	FALSE	FALSE	TRUE	TRUE	3851.75
TCGA-95-7944-01	LUAD	0.769	TRUE	FALSE	TRUE	FALSE	FALSE	TRUE	TRUE	1160.4
TCGA-95-7947-01	LUAD	0.483	TRUE	TRUE	TRUE	FALSE	FALSE	TRUE	TRUE	4639.97
TCGA-95-7948-01	LUAD	0.388	TRUE	TRUE	TRUE	FALSE	FALSE	TRUE	TRUE	3772.08
TCGA-95-8039-01	LUAD	0.508	TRUE	FALSE	TRUE	FALSE	FALSE	FALSE	TRUE	718.025
TCGA-95-8494-01	LUAD	0.407	TRUE	FALSE	TRUE	FALSE	FALSE	TRUE	TRUE	5636.61
TCGA-95-A4VK-01	LUAD	0.598	TRUE	FALSE	TRUE	FALSE	FALSE	FALSE	TRUE	2507.87
TCGA-95-A4VN-01	LUAD	0.705	TRUE	FALSE	TRUE	FALSE	FALSE	FALSE	TRUE	1147.16
TCGA-95-A4VP-01	LUAD	0.621	TRUE	FALSE	TRUE	FALSE	FALSE	TRUE	TRUE	1929.59
TCGA-96-7544-01	LUSC	0.4	TRUE	FALSE	TRUE	FALSE	FALSE	TRUE	TRUE	3426.18
TCGA-96-7545-01	LUSC	0.441	TRUE	FALSE	TRUE	FALSE	FALSE	TRUE	TRUE	2453.46
TCGA-96-8169-01	LUSC	0.463	TRUE	FALSE	TRUE	FALSE	FALSE	TRUE	TRUE	1439.08
TCGA-96-8170-01	LUSC	0.44	TRUE	FALSE	TRUE	FALSE	FALSE	TRUE	TRUE	883.857
TCGA-96-A4JK-01	LUSC	0.381	TRUE	FALSE	TRUE	FALSE	FALSE	TRUE	TRUE	6188.28
TCGA-96-A4JL-01	LUSC	0.829	TRUE	FALSE	TRUE	FALSE	FALSE	TRUE	TRUE	924.355
TCGA-97-7546-01	LUAD	0.581	TRUE	TRUE	TRUE	FALSE	FALSE	TRUE	TRUE	1280.3
TCGA-97-7547-01	LUAD	0.396	TRUE	FALSE	TRUE	FALSE	FALSE	TRUE	TRUE	4736.28
TCGA-97-7552-01	LUAD	0.815	TRUE	TRUE	TRUE	FALSE	FALSE	TRUE	TRUE	35.4977
TCGA-97-7553-01	LUAD	0.75	TRUE	TRUE	TRUE	FALSE	FALSE	TRUE	TRUE	916.03
TCGA-97-7554-01	LUAD	0.607	TRUE	TRUE	TRUE	FALSE	FALSE	TRUE	TRUE	2197.54
TCGA-97-7937-01	LUAD	0.253	TRUE	TRUE	TRUE	FALSE	FALSE	TRUE	TRUE	3291.04
TCGA-97-7938-01	LUAD	0.507	TRUE	TRUE	TRUE	FALSE	FALSE	TRUE	TRUE	1434.58
TCGA-97-7941-01	LUAD	0.536	TRUE	TRUE	TRUE	FALSE	FALSE	TRUE	TRUE	46.34
TCGA-97-8171-01	LUAD	0.215	TRUE	FALSE	TRUE	FALSE	FALSE	TRUE	TRUE	6957.06
TCGA-97-8172-01	LUAD	0.641	TRUE	FALSE	TRUE	FALSE	FALSE	TRUE	TRUE	1459.48
TCGA-97-8174-01	LUAD	0.528	TRUE	FALSE	TRUE	FALSE	FALSE	TRUE	TRUE	1503.79
TCGA-97-8175-01	LUAD	0.541	TRUE	FALSE	TRUE	FALSE	FALSE	TRUE	TRUE	1223.81
TCGA-97-8176-01	LUAD	0.25	TRUE	FALSE	TRUE	FALSE	FALSE	FALSE	TRUE	1143.76
TCGA-97-8177-01	LUAD	0.666	TRUE	FALSE	TRUE	FALSE	FALSE	TRUE	TRUE	1797.92
TCGA-97-8179-01	LUAD	0.363	TRUE	FALSE	TRUE	FALSE	FALSE	TRUE	TRUE	6181.69
TCGA-97-8547-01	LUAD	0.384	TRUE	FALSE	TRUE	FALSE	FALSE	TRUE	TRUE	2650.91
TCGA-97-8552-01	LUAD	0.545	TRUE	FALSE	TRUE	FALSE	FALSE	TRUE	TRUE	1477.31
TCGA-97-A4LX-01	LUAD	0.762	TRUE	FALSE	TRUE	FALSE	FALSE	TRUE	TRUE	364.372
TCGA-97-A4M0-01	LUAD	0.77	TRUE	FALSE	TRUE	FALSE	FALSE	TRUE	TRUE	3359.65
TCGA-97-A4M1-01	LUAD	0.594	TRUE	FALSE	TRUE	FALSE	FALSE	TRUE	TRUE	1587.49
TCGA-97-A4M2-01	LUAD	0.655	TRUE	FALSE	TRUE	FALSE	FALSE	TRUE	TRUE	86.6961
TCGA-97-A4M3-01	LUAD	0.291	TRUE	FALSE	TRUE	FALSE	FALSE	FALSE	TRUE	2915.45
TCGA-97-A4M5-01	LUAD	0.492	TRUE	FALSE	TRUE	FALSE	FALSE	TRUE	TRUE	278.287
TCGA-97-A4M6-01	LUAD	0.763	TRUE	FALSE	TRUE	FALSE	FALSE	TRUE	TRUE	1668.86
TCGA-97-A4M7-01	LUAD	0.621	TRUE	FALSE	TRUE	FALSE	FALSE	TRUE	TRUE	1090.9
TCGA-98-7454-01	LUSC	0.701	TRUE	FALSE	TRUE	FALSE	FALSE	TRUE	TRUE	214.069
TCGA-98-8020-01	LUSC	0.57	TRUE	FALSE	TRUE	FALSE	FALSE	TRUE	TRUE	3437.47
TCGA-98-8021-01	LUSC	0.339	TRUE	FALSE	TRUE	FALSE	FALSE	FALSE	TRUE	3450.98
TCGA-98-8022-01	LUSC	0.604	TRUE	FALSE	TRUE	FALSE	FALSE	FALSE	TRUE	2249.59
TCGA-98-8023-01	LUSC	0.682	TRUE	FALSE	TRUE	FALSE	FALSE	TRUE	TRUE	1753.3
TCGA-98-A538-01	LUSC	0.33	TRUE	FALSE	TRUE	FALSE	FALSE	FALSE	TRUE	5914.75
TCGA-98-A539-01	LUSC	0.245	TRUE	FALSE	TRUE	FALSE	FALSE	TRUE	TRUE	3382.62
TCGA-98-A53A-01	LUSC	0.227	TRUE	FALSE	TRUE	FALSE	FALSE	TRUE	TRUE	6787.8
TCGA-98-A53B-01	LUSC	0.457	TRUE	FALSE	TRUE	FALSE	FALSE	FALSE	TRUE	6682.93
TCGA-98-A53C-01	LUSC	0.756	TRUE	FALSE	TRUE	FALSE	FALSE	TRUE	TRUE	16.9233
TCGA-98-A53D-01	LUSC	0.536	TRUE	FALSE	TRUE	FALSE	FALSE	TRUE	TRUE	4.80056
TCGA-98-A53H-01	LUSC	0.635	TRUE	FALSE	TRUE	FALSE	FALSE	TRUE	TRUE	10.1052
TCGA-98-A53I-01	LUSC	0.483	TRUE	FALSE	TRUE	FALSE	FALSE	TRUE	TRUE	6182.18
TCGA-98-A53J-01	LUSC	0.179	TRUE	FALSE	TRUE	FALSE	FALSE	TRUE	TRUE	7103.93
TCGA-99-7458-01	LUAD	0.71	TRUE	TRUE	TRUE	FALSE	FALSE	TRUE	TRUE	472.985
TCGA-99-8025-01	LUAD	0.402	TRUE	FALSE	TRUE	FALSE	FALSE	FALSE	TRUE	4867.43
TCGA-99-8028-01	LUAD	0.864	TRUE	FALSE	TRUE	FALSE	FALSE	FALSE	TRUE	171.545
TCGA-99-8032-01	LUAD	0.354	TRUE	FALSE	TRUE	FALSE	FALSE	TRUE	TRUE	1367.67
TCGA-99-8033-01	LUAD	0.734	TRUE	FALSE	TRUE	FALSE	FALSE	TRUE	TRUE	1249.29
TCGA-99-AA5R-01	LUAD	0.803	TRUE	FALSE	TRUE	FALSE	FALSE	TRUE	TRUE	37.55
TCGA-A1-A0SB-01	BRCA	0.054	TRUE	TRUE	TRUE	TRUE	FALSE	FALSE	TRUE	63.2257
TCGA-A1-A0SD-01	BRCA	0.31	TRUE	TRUE	TRUE	TRUE	FALSE	TRUE	TRUE	2415.53
TCGA-A1-A0SE-01	BRCA	0.207	TRUE	TRUE	TRUE	TRUE	FALSE	TRUE	TRUE	1959.9
TCGA-A1-A0SF-01	BRCA	0.433	TRUE	TRUE	TRUE	TRUE	FALSE	TRUE	TRUE	2473.57
TCGA-A1-A0SG-01	BRCA	0.244	TRUE	TRUE	TRUE	TRUE	FALSE	TRUE	TRUE	2403.54
TCGA-A1-A0SH-01	BRCA	0.196	TRUE	TRUE	TRUE	TRUE	FALSE	TRUE	TRUE	1416.93
TCGA-A1-A0SI-01	BRCA	0.533	TRUE	TRUE	TRUE	TRUE	FALSE	TRUE	TRUE	2099.8
TCGA-A1-A0SJ-01	BRCA	0.206	TRUE	TRUE	TRUE	TRUE	FALSE	TRUE	TRUE	10310.2
TCGA-A1-A0SK-01	BRCA	0.066	TRUE	TRUE	TRUE	TRUE	FALSE	TRUE	TRUE	8891.35
TCGA-A1-A0SM-01	BRCA	0.124	TRUE	TRUE	TRUE	TRUE	FALSE	TRUE	TRUE	5443.96
TCGA-A1-A0SN-01	BRCA	0.409	TRUE	TRUE	TRUE	TRUE	FALSE	TRUE	TRUE	5622.97
TCGA-A1-A0SO-01	BRCA	0.163	TRUE	FALSE	TRUE	TRUE	FALSE	TRUE	TRUE	12109.8
TCGA-A1-A0SP-01	BRCA	0.348	TRUE	TRUE	TRUE	TRUE	FALSE	FALSE	TRUE	5592.15
TCGA-A1-A0SQ-01	BRCA	0.183	TRUE	TRUE	TRUE	TRUE	FALSE	TRUE	TRUE	6259.21
TCGA-A2-A04N-01	BRCA	0.218	TRUE	TRUE	TRUE	TRUE	FALSE	TRUE	TRUE	4676.92
TCGA-A2-A04P-01	BRCA	0.522	TRUE	TRUE	TRUE	TRUE	FALSE	TRUE	TRUE	5695.02
TCGA-A2-A04Q-01	BRCA	0.852	TRUE	TRUE	TRUE	TRUE	FALSE	TRUE	TRUE	699.49
TCGA-A2-A04R-01	BRCA	0.074	TRUE	TRUE	TRUE	TRUE	FALSE	TRUE	TRUE	6048.87
TCGA-A2-A04T-01	BRCA	0.463	TRUE	TRUE	TRUE	FALSE	FALSE	TRUE	TRUE	9020.03
TCGA-A2-A04U-01	BRCA	0.112	TRUE	TRUE	TRUE	TRUE	FALSE	TRUE	TRUE	18292.5
TCGA-A2-A04V-01	BRCA	0.211	TRUE	TRUE	TRUE	TRUE	FALSE	TRUE	TRUE	3064.1
TCGA-A2-A04W-01	BRCA	0.183	TRUE	TRUE	TRUE	TRUE	FALSE	TRUE	TRUE	3694.44
TCGA-A2-A04X-01	BRCA	0.697	TRUE	TRUE	TRUE	TRUE	FALSE	TRUE	TRUE	5138.09
TCGA-A2-A04Y-01	BRCA	0.487	TRUE	TRUE	TRUE	TRUE	FALSE	TRUE	TRUE	4416.41
TCGA-A2-A0CK-01	BRCA	0.326	TRUE	TRUE	TRUE	FALSE	FALSE	FALSE	TRUE	1767.96
TCGA-A2-A0CL-01	BRCA	0.803	TRUE	TRUE	TRUE	TRUE	FALSE	FALSE	TRUE	1786.42
TCGA-A2-A0CM-01	BRCA	0.768	TRUE	TRUE	TRUE	TRUE	FALSE	TRUE	TRUE	4229.21
TCGA-A2-A0CO-01	BRCA	0.59	TRUE	TRUE	TRUE	FALSE	FALSE	TRUE	TRUE	1289.16
TCGA-A2-A0CP-01	BRCA	0.236	TRUE	TRUE	TRUE	TRUE	FALSE	TRUE	TRUE	1115.69
TCGA-A2-A0CQ-01	BRCA	0.248	TRUE	TRUE	TRUE	TRUE	FALSE	TRUE	TRUE	2191.58
TCGA-A2-A0CR-01	BRCA	0.809	TRUE	TRUE	TRUE	FALSE	FALSE	TRUE	TRUE	158.527
TCGA-A2-A0CS-01	BRCA	0.22	TRUE	TRUE	TRUE	TRUE	FALSE	TRUE	TRUE	2005.2
TCGA-A2-A0CT-01	BRCA	0.123	TRUE	TRUE	TRUE	TRUE	FALSE	TRUE	TRUE	10575.8
TCGA-A2-A0CU-01	BRCA	0.115	TRUE	TRUE	TRUE	TRUE	FALSE	TRUE	TRUE	3233.16
TCGA-A2-A0CV-01	BRCA	0.405	TRUE	TRUE	TRUE	TRUE	FALSE	TRUE	TRUE	2236
TCGA-A2-A0CW-01	BRCA	0.381	TRUE	TRUE	TRUE	TRUE	FALSE	TRUE	TRUE	7580.13
TCGA-A2-A0CX-01	BRCA	0.43	TRUE	TRUE	TRUE	TRUE	FALSE	TRUE	TRUE	7953.3
TCGA-A2-A0CY-01	BRCA	0.089	TRUE	FALSE	FALSE	FALSE	FALSE	TRUE	TRUE	NA
TCGA-A2-A0CZ-01	BRCA	0.444	TRUE	TRUE	FALSE	TRUE	FALSE	TRUE	TRUE	NA
TCGA-A2-A0D0-01	BRCA	0.453	TRUE	TRUE	TRUE	TRUE	FALSE	TRUE	TRUE	14644.8
TCGA-A2-A0D1-01	BRCA	0.2	TRUE	TRUE	TRUE	TRUE	FALSE	TRUE	TRUE	8369.77
TCGA-A2-A0D2-01	BRCA	0.41	TRUE	TRUE	TRUE	TRUE	FALSE	TRUE	TRUE	6652.67
TCGA-A2-A0D3-01	BRCA	0.337	TRUE	TRUE	TRUE	TRUE	FALSE	TRUE	TRUE	4556.54
TCGA-A2-A0D4-01	BRCA	0.096	TRUE	TRUE	TRUE	TRUE	FALSE	TRUE	TRUE	9674.57
TCGA-A2-A0EM-01	BRCA	0.17	TRUE	TRUE	TRUE	TRUE	FALSE	TRUE	TRUE	2271.34
TCGA-A2-A0EN-01	BRCA	0.606	TRUE	TRUE	TRUE	TRUE	FALSE	TRUE	TRUE	984.927
TCGA-A2-A0EO-01	BRCA	0.339	TRUE	TRUE	TRUE	TRUE	FALSE	TRUE	TRUE	2102.63
TCGA-A2-A0EP-01	BRCA	0.759	TRUE	TRUE	TRUE	FALSE	FALSE	FALSE	TRUE	27.2353
TCGA-A2-A0EQ-01	BRCA	0.737	TRUE	TRUE	TRUE	TRUE	FALSE	TRUE	TRUE	3685.23
TCGA-A2-A0ER-01	BRCA	0.154	TRUE	TRUE	TRUE	TRUE	FALSE	TRUE	TRUE	2691.19
TCGA-A2-A0ES-01	BRCA	0.328	TRUE	TRUE	TRUE	TRUE	FALSE	TRUE	TRUE	145.942
TCGA-A2-A0ET-01	BRCA	0.306	TRUE	TRUE	TRUE	TRUE	FALSE	TRUE	TRUE	4072.57
TCGA-A2-A0EU-01	BRCA	0.175	TRUE	TRUE	TRUE	TRUE	FALSE	TRUE	TRUE	7038.98
TCGA-A2-A0EV-01	BRCA	0.405	TRUE	TRUE	TRUE	TRUE	FALSE	TRUE	TRUE	2610.6
TCGA-A2-A0EW-01	BRCA	0.394	TRUE	TRUE	TRUE	TRUE	FALSE	TRUE	TRUE	810.534
TCGA-A2-A0EX-01	BRCA	0.247	TRUE	TRUE	TRUE	TRUE	FALSE	TRUE	TRUE	2515.1
TCGA-A2-A0EY-01	BRCA	0.314	TRUE	TRUE	TRUE	TRUE	FALSE	TRUE	TRUE	5325.08
TCGA-A2-A0ST-01	BRCA	0.897	TRUE	TRUE	TRUE	TRUE	FALSE	TRUE	TRUE	283.015
TCGA-A2-A0SU-01	BRCA	0.25	TRUE	TRUE	TRUE	TRUE	FALSE	TRUE	TRUE	4746.24
TCGA-A2-A0SV-01	BRCA	0.385	TRUE	TRUE	TRUE	TRUE	FALSE	TRUE	TRUE	6809
TCGA-A2-A0SW-01	BRCA	0.687	TRUE	TRUE	TRUE	TRUE	FALSE	FALSE	TRUE	4602.45
TCGA-A2-A0SX-01	BRCA	0.67	TRUE	TRUE	TRUE	TRUE	FALSE	TRUE	TRUE	5725.53
TCGA-A2-A0SY-01	BRCA	0.403	TRUE	TRUE	TRUE	TRUE	FALSE	TRUE	TRUE	2339.5
TCGA-A2-A0T0-01	BRCA	0.258	TRUE	TRUE	TRUE	TRUE	FALSE	TRUE	TRUE	4296.55
TCGA-A2-A0T1-01	BRCA	0.667	TRUE	TRUE	TRUE	TRUE	FALSE	TRUE	TRUE	4504.01
TCGA-A2-A0T2-01	BRCA	0.3	TRUE	TRUE	TRUE	TRUE	FALSE	TRUE	TRUE	22298.4
TCGA-A2-A0T3-01	BRCA	0.129	TRUE	TRUE	TRUE	TRUE	FALSE	FALSE	TRUE	14323.7
TCGA-A2-A0T4-01	BRCA	0.383	TRUE	TRUE	TRUE	TRUE	FALSE	TRUE	TRUE	2956.68
TCGA-A2-A0T5-01	BRCA	0.172	TRUE	TRUE	TRUE	FALSE	FALSE	TRUE	TRUE	4138.72
TCGA-A2-A0T6-01	BRCA	0.427	TRUE	TRUE	TRUE	TRUE	FALSE	FALSE	TRUE	1306.79
TCGA-A2-A0T7-01	BRCA	0.3	TRUE	TRUE	TRUE	TRUE	FALSE	TRUE	TRUE	4732.04
TCGA-A2-A0YC-01	BRCA	0.254	TRUE	TRUE	TRUE	TRUE	FALSE	TRUE	TRUE	1861.36
TCGA-A2-A0YD-01	BRCA	0.408	TRUE	TRUE	TRUE	TRUE	FALSE	FALSE	TRUE	3178.94
TCGA-A2-A0YE-01	BRCA	0.206	TRUE	TRUE	TRUE	FALSE	FALSE	TRUE	TRUE	6761.44
TCGA-A2-A0YF-01	BRCA	0.211	TRUE	TRUE	TRUE	TRUE	FALSE	TRUE	TRUE	2156.19
TCGA-A2-A0YG-01	BRCA	0.22	TRUE	TRUE	TRUE	TRUE	FALSE	TRUE	TRUE	7073.42
TCGA-A2-A0YH-01	BRCA	0.493	TRUE	TRUE	TRUE	TRUE	FALSE	TRUE	TRUE	5370.47
TCGA-A2-A0YI-01	BRCA	0.487	TRUE	TRUE	TRUE	TRUE	FALSE	TRUE	TRUE	914.491
TCGA-A2-A0YJ-01	BRCA	0.089	TRUE	TRUE	TRUE	TRUE	FALSE	TRUE	TRUE	9952.17
TCGA-A2-A0YK-01	BRCA	0.66	TRUE	TRUE	TRUE	TRUE	FALSE	TRUE	TRUE	697.208
TCGA-A2-A0YL-01	BRCA	0.39	TRUE	TRUE	TRUE	TRUE	FALSE	TRUE	TRUE	399.22
TCGA-A2-A0YM-01	BRCA	0.458	TRUE	TRUE	TRUE	TRUE	FALSE	TRUE	TRUE	8063.81
TCGA-A2-A0YT-01	BRCA	0.188	TRUE	TRUE	TRUE	FALSE	FALSE	TRUE	TRUE	6679.27
TCGA-A2-A1FV-01	BRCA	0.069	TRUE	TRUE	TRUE	TRUE	FALSE	TRUE	TRUE	8714.52
TCGA-A2-A1FW-01	BRCA	0.203	TRUE	TRUE	TRUE	TRUE	FALSE	TRUE	TRUE	14952.9
TCGA-A2-A1FX-01	BRCA	0.257	TRUE	TRUE	TRUE	TRUE	FALSE	TRUE	TRUE	5216.68
TCGA-A2-A1FZ-01	BRCA	0.257	TRUE	TRUE	TRUE	TRUE	FALSE	TRUE	TRUE	1586.29
TCGA-A2-A1G0-01	BRCA	0.335	TRUE	TRUE	TRUE	TRUE	FALSE	TRUE	TRUE	3370.25
TCGA-A2-A1G1-01	BRCA	0.606	TRUE	TRUE	TRUE	TRUE	FALSE	TRUE	TRUE	4640.01
TCGA-A2-A1G4-01	BRCA	0.142	TRUE	TRUE	TRUE	TRUE	FALSE	TRUE	TRUE	3707.88
TCGA-A2-A1G6-01	BRCA	0.276	TRUE	TRUE	TRUE	TRUE	FALSE	TRUE	TRUE	1.34867
TCGA-A2-A259-01	BRCA	0.309	TRUE	TRUE	TRUE	TRUE	FALSE	TRUE	TRUE	2827.76
TCGA-A2-A25A-01	BRCA	0.438	TRUE	TRUE	TRUE	TRUE	FALSE	TRUE	TRUE	393.119
TCGA-A2-A25B-01	BRCA	0.284	TRUE	TRUE	TRUE	TRUE	FALSE	TRUE	TRUE	10551.5
TCGA-A2-A25C-01	BRCA	0.327	TRUE	TRUE	TRUE	TRUE	FALSE	FALSE	TRUE	2963.37
TCGA-A2-A25D-01	BRCA	0.717	TRUE	TRUE	TRUE	TRUE	FALSE	TRUE	TRUE	3715.71
TCGA-A2-A25E-01	BRCA	0.193	TRUE	TRUE	TRUE	TRUE	FALSE	TRUE	TRUE	4936.75
TCGA-A2-A25F-01	BRCA	0.852	TRUE	TRUE	TRUE	TRUE	FALSE	FALSE	TRUE	44.4966
TCGA-A2-A3KC-01	BRCA	0.275	TRUE	TRUE	TRUE	FALSE	FALSE	TRUE	TRUE	3814.56
TCGA-A2-A3KD-01	BRCA	0.174	TRUE	TRUE	TRUE	FALSE	FALSE	TRUE	TRUE	1889.07
TCGA-A2-A3XS-01	BRCA	0.354	TRUE	TRUE	TRUE	FALSE	FALSE	TRUE	TRUE	8237.33
TCGA-A2-A3XT-01	BRCA	0.563	TRUE	TRUE	TRUE	FALSE	FALSE	FALSE	TRUE	5084.24
TCGA-A2-A3XU-01	BRCA	0.103	TRUE	TRUE	TRUE	FALSE	FALSE	TRUE	TRUE	12800
TCGA-A2-A3XV-01	BRCA	0.264	TRUE	TRUE	TRUE	FALSE	FALSE	TRUE	TRUE	1557.3
TCGA-A2-A3XW-01	BRCA	0.431	TRUE	TRUE	TRUE	FALSE	FALSE	FALSE	TRUE	100.521
TCGA-A2-A3XX-01	BRCA	0.408	TRUE	TRUE	TRUE	FALSE	FALSE	TRUE	TRUE	9072.97
TCGA-A2-A3XY-01	BRCA	0.585	TRUE	TRUE	TRUE	FALSE	FALSE	TRUE	TRUE	3086.43
TCGA-A2-A3XZ-01	BRCA	0.603	TRUE	TRUE	TRUE	FALSE	FALSE	TRUE	TRUE	2454.4
TCGA-A2-A3Y0-01	BRCA	0.663	TRUE	TRUE	TRUE	FALSE	FALSE	TRUE	TRUE	2737.67
TCGA-A2-A4RW-01	BRCA	0.288	TRUE	TRUE	TRUE	FALSE	FALSE	TRUE	TRUE	3076.77
TCGA-A2-A4RX-01	BRCA	0.354	TRUE	TRUE	TRUE	FALSE	FALSE	TRUE	TRUE	1517.34
TCGA-A2-A4RY-01	BRCA	0.361	TRUE	TRUE	TRUE	FALSE	FALSE	TRUE	TRUE	105.379
TCGA-A2-A4S0-01	BRCA	0.112	TRUE	TRUE	TRUE	FALSE	FALSE	TRUE	TRUE	1.10914
TCGA-A2-A4S1-01	BRCA	0.484	TRUE	TRUE	TRUE	FALSE	FALSE	TRUE	TRUE	2268.66
TCGA-A2-A4S2-01	BRCA	0.546	TRUE	TRUE	TRUE	FALSE	FALSE	TRUE	TRUE	5890.76
TCGA-A2-A4S3-01	BRCA	0.457	TRUE	TRUE	TRUE	FALSE	FALSE	FALSE	TRUE	4354.68
TCGA-A3-3306-01	KIRC	0.464	TRUE	FALSE	TRUE	FALSE	FALSE	TRUE	TRUE	2680.33
TCGA-A3-3307-01	KIRC	0.628	TRUE	FALSE	TRUE	FALSE	FALSE	TRUE	TRUE	335.319
TCGA-A3-3308-01	KIRC	0.467	TRUE	TRUE	TRUE	TRUE	FALSE	TRUE	TRUE	537.455
TCGA-A3-3311-01	KIRC	0.556	TRUE	TRUE	TRUE	TRUE	FALSE	TRUE	TRUE	617.634
TCGA-A3-3313-01	KIRC	0.166	TRUE	FALSE	TRUE	FALSE	FALSE	TRUE	TRUE	2992.96
TCGA-A3-3316-01	KIRC	0.409	TRUE	TRUE	TRUE	TRUE	FALSE	TRUE	TRUE	1279
TCGA-A3-3317-01	KIRC	0.49	TRUE	TRUE	TRUE	TRUE	FALSE	TRUE	TRUE	1088.1
TCGA-A3-3319-01	KIRC	0.487	TRUE	TRUE	TRUE	TRUE	FALSE	TRUE	TRUE	3970.39
TCGA-A3-3320-01	KIRC	0.542	TRUE	TRUE	TRUE	TRUE	FALSE	TRUE	TRUE	1029.81
TCGA-A3-3322-01	KIRC	0.368	TRUE	TRUE	TRUE	TRUE	FALSE	TRUE	TRUE	1936.95
TCGA-A3-3323-01	KIRC	0.552	TRUE	TRUE	TRUE	TRUE	FALSE	TRUE	TRUE	344.905
TCGA-A3-3324-01	KIRC	0.589	TRUE	FALSE	TRUE	FALSE	FALSE	TRUE	TRUE	1085.63
TCGA-A3-3325-01	KIRC	0.462	TRUE	FALSE	TRUE	FALSE	FALSE	TRUE	TRUE	1225.66
TCGA-A3-3326-01	KIRC	0.752	TRUE	TRUE	TRUE	TRUE	FALSE	TRUE	TRUE	324.873
TCGA-A3-3328-01	KIRC	0.125	TRUE	FALSE	FALSE	FALSE	FALSE	FALSE	TRUE	NA
TCGA-A3-3329-01	KIRC	0.64	TRUE	FALSE	FALSE	FALSE	FALSE	TRUE	TRUE	NA
TCGA-A3-3331-01	KIRC	0.646	TRUE	FALSE	TRUE	FALSE	FALSE	TRUE	TRUE	625.318
TCGA-A3-3335-01	KIRC	0.396	TRUE	FALSE	TRUE	FALSE	FALSE	TRUE	TRUE	1203.13
TCGA-A3-3343-01	KIRC	0.698	TRUE	FALSE	TRUE	FALSE	FALSE	TRUE	TRUE	742.657
TCGA-A3-3346-01	KIRC	0.655	TRUE	TRUE	TRUE	TRUE	FALSE	TRUE	TRUE	2062.2
TCGA-A3-3347-01	KIRC	0.664	TRUE	TRUE	TRUE	TRUE	FALSE	TRUE	TRUE	732.978
TCGA-A3-3349-01	KIRC	0.481	TRUE	TRUE	TRUE	TRUE	FALSE	TRUE	TRUE	206.252
TCGA-A3-3351-01	KIRC	0.759	TRUE	FALSE	TRUE	FALSE	FALSE	TRUE	TRUE	548.601
TCGA-A3-3352-01	KIRC	0.582	TRUE	FALSE	TRUE	FALSE	FALSE	TRUE	TRUE	833.503
TCGA-A3-3357-01	KIRC	0.639	TRUE	TRUE	TRUE	TRUE	FALSE	TRUE	TRUE	780.103
TCGA-A3-3358-01	KIRC	0.752	TRUE	TRUE	TRUE	TRUE	FALSE	TRUE	TRUE	760.28
TCGA-A3-3359-01	KIRC	0.715	TRUE	FALSE	TRUE	FALSE	FALSE	TRUE	TRUE	455.75
TCGA-A3-3362-01	KIRC	0.492	TRUE	TRUE	TRUE	TRUE	FALSE	TRUE	TRUE	244.839
TCGA-A3-3363-01	KIRC	0.368	TRUE	TRUE	TRUE	TRUE	FALSE	TRUE	TRUE	1962.1
TCGA-A3-3365-01	KIRC	0.518	TRUE	TRUE	TRUE	TRUE	FALSE	FALSE	TRUE	359.417
TCGA-A3-3367-01	KIRC	0.522	TRUE	TRUE	TRUE	TRUE	FALSE	TRUE	TRUE	557.489
TCGA-A3-3370-01	KIRC	0.774	TRUE	TRUE	TRUE	TRUE	FALSE	TRUE	TRUE	318.391
TCGA-A3-3372-01	KIRC	0.625	TRUE	TRUE	TRUE	TRUE	FALSE	TRUE	TRUE	2493.56
TCGA-A3-3373-01	KIRC	0.475	TRUE	TRUE	TRUE	TRUE	FALSE	TRUE	TRUE	777.545
TCGA-A3-3374-01	KIRC	0.516	TRUE	FALSE	TRUE	FALSE	FALSE	TRUE	TRUE	3835.97
TCGA-A3-3376-01	KIRC	0.469	TRUE	TRUE	TRUE	TRUE	FALSE	TRUE	TRUE	132.051
TCGA-A3-3378-01	KIRC	0.74	TRUE	TRUE	TRUE	TRUE	FALSE	TRUE	TRUE	229.959
TCGA-A3-3380-01	KIRC	0.478	TRUE	TRUE	TRUE	TRUE	FALSE	TRUE	TRUE	1129.07
TCGA-A3-3382-01	KIRC	0.513	TRUE	TRUE	TRUE	TRUE	FALSE	TRUE	TRUE	4957.59
TCGA-A3-3383-01	KIRC	0.697	TRUE	TRUE	TRUE	TRUE	FALSE	TRUE	TRUE	454.475
TCGA-A3-3385-01	KIRC	0.354	TRUE	TRUE	TRUE	TRUE	FALSE	TRUE	TRUE	1748.11
TCGA-A3-3387-01	KIRC	0.503	TRUE	TRUE	TRUE	TRUE	FALSE	TRUE	TRUE	845.762
TCGA-A3-A6NI-01	KIRC	0.443	TRUE	FALSE	TRUE	FALSE	FALSE	FALSE	FALSE	1093.86
TCGA-A3-A6NJ-01	KIRC	0.821	TRUE	FALSE	TRUE	FALSE	FALSE	TRUE	TRUE	174.792
TCGA-A3-A6NL-01	KIRC	0.634	TRUE	FALSE	TRUE	FALSE	FALSE	TRUE	TRUE	495.491
TCGA-A3-A6NN-01	KIRC	0.549	TRUE	FALSE	TRUE	FALSE	FALSE	TRUE	TRUE	1323.56
TCGA-A3-A8CQ-01	KIRC	0.448	TRUE	FALSE	TRUE	FALSE	FALSE	TRUE	TRUE	1034.42
TCGA-A3-A8OU-01	KIRC	0.577	TRUE	FALSE	TRUE	FALSE	FALSE	TRUE	FALSE	259.4
TCGA-A3-A8OV-01	KIRC	0.47	TRUE	FALSE	TRUE	FALSE	FALSE	TRUE	TRUE	1318.71
TCGA-A3-A8OW-01	KIRC	0.606	TRUE	FALSE	TRUE	FALSE	FALSE	TRUE	TRUE	398.179
TCGA-A3-A8OX-01	KIRC	0.644	TRUE	FALSE	TRUE	FALSE	FALSE	TRUE	FALSE	10.8779
TCGA-A4-7286-01	KIRP	0.395	TRUE	TRUE	TRUE	TRUE	FALSE	FALSE	TRUE	2478.49
TCGA-A4-7287-01	KIRP	0.38	TRUE	TRUE	TRUE	TRUE	FALSE	TRUE	TRUE	3159.66
TCGA-A4-7288-01	KIRP	0.081	TRUE	TRUE	TRUE	TRUE	FALSE	TRUE	TRUE	2962.33
TCGA-A4-7583-01	KIRP	0.543	TRUE	TRUE	TRUE	TRUE	FALSE	TRUE	TRUE	2315.56
TCGA-A4-7584-01	KIRP	0.122	TRUE	TRUE	TRUE	TRUE	FALSE	FALSE	FALSE	1526.75
TCGA-A4-7585-01	KIRP	0.612	TRUE	TRUE	TRUE	TRUE	FALSE	FALSE	TRUE	292.069
TCGA-A4-7732-01	KIRP	0.224	TRUE	TRUE	TRUE	TRUE	FALSE	TRUE	TRUE	4665.24
TCGA-A4-7734-01	KIRP	0.3	TRUE	TRUE	TRUE	TRUE	FALSE	FALSE	TRUE	1741.34
TCGA-A4-7828-01	KIRP	0.503	TRUE	TRUE	TRUE	TRUE	FALSE	TRUE	FALSE	2.72189
TCGA-A4-7915-01	KIRP	0.408	TRUE	TRUE	TRUE	TRUE	FALSE	FALSE	TRUE	838.709
TCGA-A4-7996-01	KIRP	0.382	TRUE	TRUE	TRUE	TRUE	FALSE	TRUE	TRUE	1364.52
TCGA-A4-7997-01	KIRP	0.339	TRUE	TRUE	TRUE	TRUE	FALSE	TRUE	TRUE	2657.51
TCGA-A4-8098-01	KIRP	0.337	TRUE	TRUE	TRUE	TRUE	FALSE	TRUE	TRUE	4008.31
TCGA-A4-8310-01	KIRP	0.177	TRUE	TRUE	TRUE	TRUE	FALSE	TRUE	TRUE	3730.63
TCGA-A4-8311-01	KIRP	0.158	TRUE	TRUE	TRUE	TRUE	FALSE	FALSE	TRUE	3735.7
TCGA-A4-8312-01	KIRP	0.288	TRUE	TRUE	TRUE	TRUE	FALSE	TRUE	TRUE	4.39924
TCGA-A4-8515-01	KIRP	0.139	TRUE	TRUE	TRUE	TRUE	FALSE	TRUE	TRUE	3059.99
TCGA-A4-8516-01	KIRP	0.312	TRUE	FALSE	TRUE	FALSE	FALSE	FALSE	TRUE	4979.83
TCGA-A4-8517-01	KIRP	0.24	TRUE	TRUE	TRUE	TRUE	FALSE	FALSE	TRUE	3460.47
TCGA-A4-8518-01	KIRP	0.166	TRUE	TRUE	TRUE	TRUE	FALSE	FALSE	TRUE	975.816
TCGA-A4-8630-01	KIRP	0.18	TRUE	TRUE	TRUE	TRUE	FALSE	FALSE	TRUE	3567.62
TCGA-A4-A48D-01	KIRP	0.437	TRUE	TRUE	TRUE	TRUE	FALSE	TRUE	TRUE	1493.32
TCGA-A4-A4ZT-01	KIRP	0.361	TRUE	TRUE	TRUE	TRUE	FALSE	TRUE	TRUE	6400.83
TCGA-A4-A57E-01	KIRP	0.189	TRUE	TRUE	TRUE	TRUE	FALSE	TRUE	TRUE	5833.02
TCGA-A4-A5DU-01	KIRP	0.235	TRUE	TRUE	TRUE	TRUE	FALSE	TRUE	TRUE	12245
TCGA-A4-A5XZ-01	KIRP	0.281	TRUE	TRUE	TRUE	TRUE	FALSE	TRUE	TRUE	5450.02
TCGA-A4-A5Y0-01	KIRP	0.085	TRUE	TRUE	TRUE	TRUE	FALSE	TRUE	TRUE	4489.82
TCGA-A4-A5Y1-01	KIRP	0.283	TRUE	TRUE	TRUE	TRUE	FALSE	FALSE	TRUE	6916.02
TCGA-A4-A6HP-01	KIRP	0.401	TRUE	TRUE	TRUE	TRUE	FALSE	TRUE	TRUE	4383.28
TCGA-A4-A772-01	KIRP	0.439	TRUE	FALSE	TRUE	FALSE	FALSE	TRUE	FALSE	3135.01
TCGA-A4-A7UZ-01	KIRP	0.637	TRUE	FALSE	TRUE	FALSE	FALSE	TRUE	FALSE	2329.47
TCGA-A5-A1OH-01	UCEC	0.071	TRUE	FALSE	TRUE	FALSE	TRUE	TRUE	TRUE	5963.99
TCGA-A5-A2K2-01	UCEC	0.222	TRUE	FALSE	TRUE	FALSE	TRUE	TRUE	TRUE	3682.7
TCGA-A5-A2K3-01	UCEC	0.915	TRUE	FALSE	TRUE	FALSE	TRUE	TRUE	TRUE	1048.34
TCGA-A5-A2K4-01	UCEC	0.318	TRUE	FALSE	TRUE	FALSE	TRUE	TRUE	TRUE	2714.86
TCGA-A5-A2K5-01	UCEC	0.245	TRUE	FALSE	TRUE	FALSE	TRUE	TRUE	TRUE	2.43818
TCGA-A5-A2K7-01	UCEC	0.307	TRUE	FALSE	TRUE	FALSE	TRUE	TRUE	TRUE	15.7468
TCGA-A5-A3LO-01	UCEC	0.272	TRUE	FALSE	TRUE	FALSE	TRUE	TRUE	TRUE	1303.56
TCGA-A5-A3LP-01	UCEC	0.291	TRUE	FALSE	TRUE	FALSE	TRUE	TRUE	TRUE	6670.95
TCGA-A5-A7WJ-01	UCEC	0.175	TRUE	FALSE	TRUE	FALSE	TRUE	TRUE	FALSE	4347.13
TCGA-A5-A7WK-01	UCEC	0.211	TRUE	FALSE	TRUE	FALSE	TRUE	TRUE	FALSE	7870.04
TCGA-A5-AB3J-01	UCEC	0.411	TRUE	FALSE	TRUE	FALSE	TRUE	TRUE	FALSE	1082.56
TCGA-A6-2675-01	COAD	0.492	TRUE	TRUE	TRUE	FALSE	FALSE	TRUE	TRUE	3343.56
TCGA-A6-2682-01	COAD	0.298	TRUE	FALSE	TRUE	FALSE	TRUE	TRUE	TRUE	643.231
TCGA-A6-2684-01	COAD	0.527	TRUE	FALSE	TRUE	FALSE	TRUE	FALSE	TRUE	994.785
TCGA-A6-2685-01	COAD	0.451	TRUE	FALSE	TRUE	FALSE	TRUE	FALSE	TRUE	1164.57
TCGA-A6-2686-01	COAD	0.731	TRUE	FALSE	TRUE	FALSE	TRUE	TRUE	TRUE	2946.8
TCGA-A6-4105-01	COAD	0.552	TRUE	TRUE	TRUE	FALSE	TRUE	TRUE	TRUE	3539.16
TCGA-A6-5656-01	COAD	0.247	TRUE	TRUE	TRUE	FALSE	TRUE	TRUE	TRUE	7458.44
TCGA-A6-5657-01	COAD	0.406	TRUE	TRUE	TRUE	FALSE	TRUE	TRUE	TRUE	739.781
TCGA-A6-5659-01	COAD	0.236	TRUE	TRUE	TRUE	FALSE	TRUE	TRUE	TRUE	5807.54
TCGA-A6-5660-01	COAD	0.234	TRUE	TRUE	TRUE	FALSE	TRUE	TRUE	TRUE	6223.52
TCGA-A6-5661-01	COAD	0.446	TRUE	TRUE	TRUE	FALSE	TRUE	TRUE	TRUE	131.95
TCGA-A6-5662-01	COAD	0.185	TRUE	TRUE	TRUE	FALSE	TRUE	TRUE	TRUE	9712.81
TCGA-A6-5664-01	COAD	0.414	TRUE	TRUE	TRUE	FALSE	TRUE	TRUE	TRUE	265.686
TCGA-A6-5665-01	COAD	0.438	TRUE	TRUE	TRUE	FALSE	TRUE	TRUE	TRUE	158.713
TCGA-A6-5666-01	COAD	0.2	TRUE	TRUE	TRUE	FALSE	TRUE	TRUE	TRUE	3005.39
TCGA-A6-5667-01	COAD	0.268	TRUE	TRUE	TRUE	FALSE	TRUE	TRUE	TRUE	6823.3
TCGA-A6-6137-01	COAD	0.434	TRUE	TRUE	TRUE	FALSE	TRUE	FALSE	TRUE	1287.52
TCGA-A6-6138-01	COAD	0.716	TRUE	TRUE	TRUE	FALSE	TRUE	TRUE	TRUE	3163.16
TCGA-A6-6140-01	COAD	0.364	TRUE	TRUE	TRUE	FALSE	TRUE	FALSE	TRUE	5818.74
TCGA-A6-6141-01	COAD	0.505	TRUE	TRUE	TRUE	FALSE	TRUE	TRUE	TRUE	21.0279
TCGA-A6-6142-01	COAD	0.378	TRUE	TRUE	TRUE	FALSE	TRUE	TRUE	TRUE	5313.2
TCGA-A6-6648-01	COAD	0.263	TRUE	TRUE	TRUE	FALSE	TRUE	TRUE	TRUE	2893.51
TCGA-A6-6649-01	COAD	0.343	TRUE	TRUE	TRUE	FALSE	TRUE	TRUE	TRUE	2598.19
TCGA-A6-6650-01	COAD	0.261	TRUE	TRUE	TRUE	FALSE	TRUE	TRUE	TRUE	7538.24
TCGA-A6-6651-01	COAD	0.494	TRUE	TRUE	TRUE	FALSE	TRUE	TRUE	TRUE	2147.14
TCGA-A6-6652-01	COAD	0.226	TRUE	TRUE	TRUE	FALSE	TRUE	FALSE	TRUE	8064.03
TCGA-A6-6653-01	COAD	0.462	TRUE	TRUE	TRUE	FALSE	TRUE	TRUE	TRUE	230.612
TCGA-A6-6654-01	COAD	0.635	TRUE	TRUE	TRUE	FALSE	TRUE	TRUE	TRUE	2299.49
TCGA-A6-6780-01	COAD	0.769	TRUE	TRUE	TRUE	FALSE	TRUE	TRUE	TRUE	884.119
TCGA-A6-6781-01	COAD	0.538	TRUE	TRUE	TRUE	FALSE	TRUE	FALSE	TRUE	18.1925
TCGA-A6-6782-01	COAD	0.468	TRUE	TRUE	TRUE	FALSE	TRUE	TRUE	TRUE	3422.72
TCGA-A6-A565-01	COAD	0.613	TRUE	FALSE	TRUE	FALSE	TRUE	FALSE	TRUE	52.8288
TCGA-A6-A566-01	COAD	0.536	TRUE	FALSE	TRUE	FALSE	TRUE	TRUE	TRUE	497.086
TCGA-A6-A567-01	COAD	0.222	TRUE	FALSE	TRUE	FALSE	TRUE	TRUE	TRUE	5369.43
TCGA-A6-A56B-01	COAD	0.141	TRUE	FALSE	TRUE	FALSE	TRUE	TRUE	TRUE	8696.85
TCGA-A6-A5ZU-01	COAD	0.43	TRUE	FALSE	TRUE	FALSE	TRUE	TRUE	TRUE	9393.63
TCGA-A7-A0CD-01	BRCA	0.145	TRUE	TRUE	TRUE	TRUE	FALSE	TRUE	TRUE	9644.7
TCGA-A7-A0CE-01	BRCA	0.264	TRUE	TRUE	TRUE	TRUE	FALSE	TRUE	TRUE	5954.05
TCGA-A7-A0CG-01	BRCA	0.496	TRUE	TRUE	TRUE	TRUE	FALSE	TRUE	TRUE	1320.38
TCGA-A7-A0CH-01	BRCA	0.181	TRUE	TRUE	TRUE	TRUE	FALSE	TRUE	TRUE	3099.36
TCGA-A7-A0CJ-01	BRCA	0.205	TRUE	TRUE	TRUE	TRUE	FALSE	TRUE	TRUE	10899.2
TCGA-A7-A0D9-01	BRCA	0.079	TRUE	TRUE	TRUE	TRUE	FALSE	TRUE	TRUE	10846.3
TCGA-A7-A0DA-01	BRCA	0.222	TRUE	TRUE	TRUE	TRUE	FALSE	TRUE	TRUE	7517.3
TCGA-A7-A0DB-01	BRCA	0.203	TRUE	TRUE	TRUE	TRUE	FALSE	TRUE	TRUE	5816.82
TCGA-A7-A0DC-01	BRCA	0.026	TRUE	TRUE	FALSE	FALSE	FALSE	TRUE	TRUE	NA
TCGA-A7-A13D-01	BRCA	0.138	TRUE	TRUE	TRUE	TRUE	FALSE	TRUE	TRUE	8971.97
TCGA-A7-A13E-01	BRCA	0.147	TRUE	TRUE	TRUE	FALSE	FALSE	TRUE	TRUE	12740.3
TCGA-A7-A13F-01	BRCA	0.088	TRUE	TRUE	TRUE	TRUE	FALSE	FALSE	TRUE	5490.13
TCGA-A7-A13G-01	BRCA	0.116	TRUE	TRUE	TRUE	TRUE	FALSE	FALSE	TRUE	6456.6
TCGA-A7-A13H-01	BRCA	0.517	TRUE	TRUE	TRUE	FALSE	FALSE	TRUE	TRUE	1424.24
TCGA-A7-A26E-01	BRCA	0.176	TRUE	TRUE	TRUE	TRUE	FALSE	TRUE	TRUE	1653.52
TCGA-A7-A26F-01	BRCA	0.491	TRUE	TRUE	TRUE	TRUE	FALSE	TRUE	TRUE	1720.62
TCGA-A7-A26G-01	BRCA	0.432	TRUE	TRUE	TRUE	TRUE	FALSE	TRUE	TRUE	1320.5
TCGA-A7-A26H-01	BRCA	0.313	TRUE	TRUE	TRUE	TRUE	FALSE	TRUE	TRUE	3285.28
TCGA-A7-A26I-01	BRCA	0.176	TRUE	TRUE	TRUE	TRUE	FALSE	TRUE	TRUE	9985.85
TCGA-A7-A26J-01	BRCA	0.24	TRUE	TRUE	TRUE	TRUE	FALSE	FALSE	TRUE	4903.52
TCGA-A7-A2KD-01	BRCA	0.369	TRUE	TRUE	TRUE	FALSE	FALSE	TRUE	TRUE	7500.67
TCGA-A7-A3IY-01	BRCA	0.309	TRUE	TRUE	TRUE	FALSE	FALSE	TRUE	TRUE	116.83
TCGA-A7-A3IZ-01	BRCA	0.104	TRUE	TRUE	TRUE	FALSE	FALSE	FALSE	TRUE	6358.01
TCGA-A7-A3J0-01	BRCA	0.376	TRUE	TRUE	TRUE	FALSE	FALSE	TRUE	TRUE	3701.33
TCGA-A7-A3J1-01	BRCA	0.538	TRUE	TRUE	TRUE	FALSE	FALSE	TRUE	TRUE	1710.86
TCGA-A7-A3RF-01	BRCA	0.109	TRUE	TRUE	TRUE	FALSE	FALSE	TRUE	TRUE	56.6397
TCGA-A7-A425-01	BRCA	0.26	TRUE	TRUE	TRUE	FALSE	FALSE	TRUE	TRUE	6696.6
[truncated: 7,084 more rows]
