# Supplementary material for: Genomic landscape associated with potential response to anti-CTLA-4 treatment in cancers
Source: Nat Commun. 2017 Oct 19;8:1050. doi: 10.1038/s41467-017-01018-0 (PMC5648801; doi:10.1038/s41467-017-01018-0)
Supplement: Supplementary file 7 — Supplementary Data 4 [file 41467_2017_1018_MOESM7_ESM.xlsx]

## Sheet: SD4
Supplementary Data 4. Immune signature scores and progression-free survival of immunotherapy in TCGA skin cutaneous melanoma
TCGA_ID	Cancer_type	Immune_signature_score	drug_name	drug_type	Progression_free_survival (days)	Event (1=progression, 0=censor)
TCGA-HR-A2OH	SKCM	0.917	Interferon	Immunotherapy	363	1
TCGA-W3-AA1W	SKCM	0.895	Interferon	Immunotherapy	426	1
TCGA-DA-A3F2	SKCM	0.872	Ipilimumab	Immunotherapy	297	1
TCGA-EE-A2ME	SKCM	0.868	Cancer Vax	Vaccine	637	1
TCGA-FR-A44A	SKCM	0.865	Interferon	Immunotherapy	365	1
TCGA-D3-A2JH	SKCM	0.837	Interferon	Immunotherapy	30	1
TCGA-FR-A729	SKCM	0.812	Sylatron	Immunotherapy	463	0
TCGA-GN-A4U5	SKCM	0.795	Interferon	Immunotherapy	224	1
TCGA-D3-A3CB	SKCM	0.782	MEL-44	Vaccine	363	1
TCGA-ER-A2NG	SKCM	0.74	IL-2	Immunotherapy	61	1
TCGA-D3-A8GN	SKCM	0.736	[Not Available]	Immunotherapy	415	1
TCGA-EE-A2GU	SKCM	0.723	[Not Available]	Vaccine	754	1
TCGA-W3-A824	SKCM	0.703	[Not Available]	Immunotherapy	1219	1
TCGA-D3-A8GB	SKCM	0.684	Interferon	Immunotherapy	244	1
TCGA-EE-A2MG	SKCM	0.679	Cancer Vax	Vaccine	748	1
TCGA-FS-A1ZW	SKCM	0.667	interferon alpha	Immunotherapy	305	1
TCGA-GN-A4U8	SKCM	0.665	Sylatron	Immunotherapy	301	0
TCGA-ER-A19M	SKCM	0.659	Interferon	Immunotherapy	74	1
TCGA-EE-A2GH	SKCM	0.651	[Not Available]	Vaccine	1380	0
TCGA-D3-A2JL	SKCM	0.645	GP100	Vaccine	359	1
TCGA-EE-A3AE	SKCM	0.639	Mage A3	Vaccine	770	1
TCGA-EE-A2GL	SKCM	0.606	[Not Available]	Vaccine	1002	0
TCGA-ER-A19Q	SKCM	0.599	IL-18	Immunotherapy	63	1
TCGA-EE-A2GI	SKCM	0.59	[Not Available]	Vaccine	840	0
TCGA-ER-A195	SKCM	0.586	interferon	Immunotherapy	349	1
TCGA-EE-A3AA	SKCM	0.58	[Not Available]	Vaccine	3737	1
TCGA-EE-A2MH	SKCM	0.578	[Not Available]	Vaccine	73	1
TCGA-FR-A7U9	SKCM	0.569	Talimogene Laherparepvec (T-VEC)	Vaccine	63	1
TCGA-FS-A1ZT	SKCM	0.559	interferon alpha	Immunotherapy	655	1
TCGA-W3-AA1Q	SKCM	0.528	Interferon	Immunotherapy	609	1
TCGA-D3-A2JP	SKCM	0.524	Interferon Alpha	Immunotherapy	120	1
TCGA-W3-A825	SKCM	0.519	Interleukin-2	Immunotherapy	123	1
TCGA-D3-A2JC	SKCM	0.457	Interferon alfa	Immunotherapy	361	1
TCGA-W3-AA1V	SKCM	0.452	[Not Available]	Immunotherapy	275	1
TCGA-EE-A2ML	SKCM	0.433	MORAb-004	Immunotherapy	85	1
TCGA-D3-A2JN	SKCM	0.428	Interferon-alfa	Immunotherapy	31	1
TCGA-QB-AA9O	SKCM	0.425	ipilimumab	Immunotherapy	63	1
TCGA-WE-AAA0	SKCM	0.408	ipilimumab	Immunotherapy	61	1
TCGA-FR-A3YN	SKCM	0.402	Ipilimumab	Immunotherapy	63	1
TCGA-EE-A2GS	SKCM	0.393	Ipilimumab	Immunotherapy	96	1
TCGA-EE-A29H	SKCM	0.386	[Not Available]	Vaccine	1071	0
TCGA-D3-A3C7	SKCM	0.38	Interferon	Immunotherapy	365	1
TCGA-W3-AA1R	SKCM	0.379	[Not Available]	Immunotherapy	1400	1
TCGA-EB-A24D	SKCM	0.344	Alferon	Immunotherapy	120	1
TCGA-D9-A148	SKCM	0.342	ipilimumab	Immunotherapy	70	1
TCGA-D3-A1Q9	SKCM	0.328	GP-100	Vaccine	148	1
TCGA-EB-A5SH	SKCM	0.296	Interferon alpha	Immunotherapy	63	1
TCGA-EB-A57M	SKCM	0.294	Ciclosporin	Immunotherapy	134	1
TCGA-EE-A2MM	SKCM	0.293	VMCL	Vaccine	692	1
TCGA-W3-AA21	SKCM	0.283	[Not Available]	Immunotherapy	1035	1
TCGA-FW-A3TV	SKCM	0.277	Interferon	Immunotherapy	25	1
TCGA-FW-A3R5	SKCM	0.273	Interferon	Immunotherapy	279	1
TCGA-D3-A1QA	SKCM	0.248	recMAGE- A3	Vaccine	53	1
TCGA-YG-AA3O	SKCM	0.239	Yervoy	Immunotherapy	73	0
TCGA-W3-A828	SKCM	0.225	[Not Available]	Immunotherapy	396	1
TCGA-FR-A8YD	SKCM	0.223	Ipilimumab	Immunotherapy	68	1
TCGA-EE-A3JI	SKCM	0.216	Ipilimumab	Immunotherapy	40	1
TCGA-GN-A4U9	SKCM	0.212	Ipilimumab	Immunotherapy	84	1
TCGA-EE-A2M6	SKCM	0.21	[Not Available]	Vaccine	1771	1
TCGA-YG-AA3P	SKCM	0.185	Yervoy	Immunotherapy	54	0
TCGA-GN-A264	SKCM	0.172	Interferon alfa-2b	Immunotherapy	359	1
TCGA-GN-A4U4	SKCM	0.162	Ipilimumab	Immunotherapy	70	1
TCGA-EE-A29C	SKCM	0.133	Yervoy	Immunotherapy	123	1
TCGA-D3-A1Q6	SKCM	0.131	Interferon	Immunotherapy	365	1
TCGA-EB-A6QY	SKCM	0.129	Laferon	Immunotherapy	8	1
TCGA-FS-A4F0	SKCM	0.12	Interferon alpha	Immunotherapy	486	1
TCGA-EB-A5KH	SKCM	0.111	Leukine	Immunotherapy	58	1
TCGA-FR-A69P	SKCM	0.11	Ipilimumab	Immunotherapy	371	0
TCGA-GN-A4U3	SKCM	0.109	Interleukin-2	Immunotherapy	275	1
TCGA-DA-A3F5	SKCM	0.108	Pembrolizumab	Immunotherapy	154	1
TCGA-FS-A1ZS	SKCM	0.107	interferon alpha	Immunotherapy	224	1
TCGA-D3-A5GT	SKCM	0.09	Interferon alpha	Immunotherapy	377	0
TCGA-EB-A24C	SKCM	0.08	Laferon	Immunotherapy	183	1
TCGA-FR-A7U8	SKCM	0.068	Interferon	Immunotherapy	119	1
TCGA-D3-A3MV	SKCM	0.067	Interleukin-2	Immunotherapy	67	1
TCGA-D3-A1Q1	SKCM	0.063	[Not Available]	Immunotherapy	94	1
TCGA-WE-A8ZM	SKCM	0.05	Diphencyprone	Immunotherapy	62	0
TCGA-D3-A8GK	SKCM	0.044	MEL-44	Vaccine	365	1
Abbreviation: SKCM, skin cutaneous melanoma
