# Supplementary material for: Genomic landscape associated with potential response to anti-CTLA-4 treatment in cancers
Source: Nat Commun. 2017 Oct 19;8:1050. doi: 10.1038/s41467-017-01018-0 (PMC5648801; doi:10.1038/s41467-017-01018-0)
Supplement: Supplementary file 8 — Supplementary Data 5 [file 41467_2017_1018_MOESM8_ESM.xlsx]

## Sheet: SD5
Supplementary Data 5. Cancer genes with frequent mutation or copy number alteration
Frequent somatic mutations (Lawrence et al. Nature 2013)	Frequent somatic copy number alterations (Beroukhim et al. Nature 2010)
Somatic mutations	Amplification	Deletion
ACO1	MYC	CDKN2A
ACVR1B	ORAOV1	CDKN2B
ACVR2B	ERBB2	FHIT
ADNP	C17orf37	WWOX
AGBL5	TSPAN31	PTPRD
AJUBA	NKX2-1	MACROD2
AKT1	MDM2	FLRT3
ALB	EGFR	PARK2
ALK	MCL1	RB1
ALKBH6	FGFR1	LRP1B
ALPK2	KRAS	FRG2
ANK3	CCNE1	TUBB4Q
APC	CRKL	PLK2
APOL2	LRRC10	PDE4D
ARHGAP35	HMGA2	A2BP1
ARID1A	SPRY3	TRB
ARID2	TERT	PRSS1
ARID5B	PRKCI	TMEM16G
ARL15	IGF1R	ING5
ARL2	ZNF217	GZMM
ARL6IP1	PLAT	THEG
ARMCX1	MYCL1	PPAP2C
ASXL1	NGFR	C19orf20
ASXL2	PHB	PTEN
ATM	MYCN	CSMD1
ATP1B4	CDK6	DFFB
ATP5B	IRS2	ZBTB48
ATRX	GAB2	AJAP1
AXIN2	BIRC7	MGC48628
AZGP1	RPS6KB1	PARD6G
B2M	REG4	FOXC1
BAGE	ZNF704	ZNF324
BAP1	ZBTB10	DMD
BCLAF1	VEGFA	OPCML
BCOR	ID1	HNT
BHMT2	BCL2L1	LATS2
BLOC1S3	MYB	TUBGCP6
BRAF	AKT3	A26B1
BRCA1	FLT4	VPREB1
BRCA2	MET	MGMT
BRE	ITGB4	SYCE1
C12orf39	CABLES1	ETV6
C12orf57	FLOT2	ZNF596
C19orf33	ERAL1	SFN
C1QL2	PHF12	RASSF7
C2orf84	GRB2	NF1
C3orf62	JUN	CADM1
C3orf70	DHRS13	ATM
CAP2	DYRK1B	FOXD4
CARD11	MAPK7	DKK1
CASP8	KIT	PRKG1
CBFB	NOV	TUBGCP4
CC2D1B	FAM60A	MAGI3
CCDC101	LGALS7	SHOX
CCDC120	BIRC2	CHL1
CCDC36	KDR	MELK
CCDC6	DDX11	PAX5
CCND1	PIK3CA	TP53
CD1D	MYOC	ATP1B2
CD300LG	TP73	CHFR
CD38	BPTF	NCAPG2
CD5L	PEA15	PTPRN2
CD70	BAT2D1	FUT9
CD79B	RRM2B	C6orf165
CDC27	TSEN34	C6orf162
CDH1	GPC5	GJA10
CDK12	WNK1	APC
CDK4	MDM4	C8orf4
CDKN1A	PRKCG	ZMAT4
CDKN1B	ADAMTS20	BBC3
CDKN2A	ELK3	TUBB8
CDX1	MAFA	NEGR1
CEBPA	PARP10	GPC6
CEP76	SFTPA1B	DCT
CHCHD8	POU1F1	RBL2
CHD4	WSB1	SOX12
CHD8	PTP4A3	SCGB3A1
CIC	MRPL41	FH
CLEC4E	TRAF2	ZNF678
CNBD1	LHX3	RYR2
CNKSR1	AR	HBZ
COL5A1	PTP4A1	CNP
COL5A3	BCL2L2	MYT1L
CPS1	NRARP	LSAMP
CREBBP	E2F3	MAGI2
CSAG1	FOXO1	CLDN4
CSNK2A1	WT1	CNTNAP2
CTCF		PRIMA1
CTNNB1		C16orf3
CUL4B		NAALADL2
CUX1		ZNF750
CXCL9		ZNF492
CYP7B1		ZNF99
DDX3X		ANKS1B
DDX5		ZNF141
DHDH		COLEC12
DIAPH1		PARD3B
DIS3		DPYSL2
DNAH12		STMN4
DNER		FLJ23356
DNMT3A		SNTG1
DPRX		ST18
DUSP19		RB1CC1
EAF1		CDH13
EEF1A1		CCDC89
EGFR		DLG2
EIF1AX		CCDC90B
EIF2S2		TMEM126A
ELF3		GPHN
ELTD1		MPP5
EP300		SDK1
EPB41L3		TUBGCP3
EPHA2		MAP2K4
EPS8		ZNF18
ERBB2		TMPRSS2
ERBB3		DSCAM
ERCC2		SMAD4
ETHE1		DCC
EZH1		GTF3C6
EZH2		TUBE1
EZR		ROS1
FAM123B		ZNF219
FAM166A		NDRG2
FAM46C
FAM8A1
FAT1
FBXW7
FGFBP1
FGFR2
FGFR3
FKBP2
FLG
FLT3
FOXA1
FOXQ1
FRG1
FRMD7
FUBP1
GATA3
GFER
GNA13
GNB1
GNPTAB
GOT1
GPATCH4
GPS2
GUSB
GZMA
HGC6.3
HIF1A
HIST1H1E
HIST1H2BN
HIST1H3B
HIST1H3C
HIST1H4E
HRAS
HSP90AB1
HSPA6
IDH1
IDH2
IFITM1
IL32
IL7R
ING1
INPPL1
INTS12
IPO7
IRF4
IRF6
ITGB7
ITPKB
JTB
KDM5C
KDM6A
KEAP1
KEL
KIT
KLHL8
KRAS
LARP4B
LASP1
LCE4A
LCTL
LMAN1
LPAR2
LZTR1
MAP2K1
MAP2K4
MAP3K1
MAP4K3
MBD1
MBD6
MED12
MED23
MET
MGA
MICALCL
MLF2
MLL
MLL2
MLL3
MLL4
MMD
MORC4
MPO
MRPS25
MTOR
MUC17
MUC4
MUC7
MXRA5
MYB
MYCN
MYD88
MYOCD
NBPF1
NCOR1
NF1
NFE2L2
NKIRAS2
NOTCH1
NPM1
NRAS
NSD1
NTN4
NUP210L
ODAM
OMA1
OR4A16
OR52N1
OTUD7A
OVOL1
PAPD5
PBRM1
PCBP1
PDAP1
PDCD2L
PDSS2
PHF6
PIGB
PIGZ
PIK3CA
PIK3R1
PLCG2
POLE
POU2AF1
POU2F2
PPM1D
PPM1F
PPP2R1A
PPP2R4
PPP6C
PRDM1
PRKRIR
PTEN
PTH2
PTPN11
PTPN12
QKI
RAB40A
RAC1
RAD21
RAD51C
RASA1
RB1
RBM10
RGS2
RHEB
RHOA
RIMS2
RIT1
RNF43
RPL19
RPL22
RPL5
RPS15
RPS2
RPSA
RPTN
RSBN1L
RUNX1
RXRA
RYBP
SACS
SELP
2015-09-12
SERPINB13
SETD2
SETDB1
SF3B1
SGK1
SHOX
SIRT4
SLC17A8
SLC1A3
SLC22A14
SLC25A15
SLC25A5
SLC26A3
SLC44A3
SLC4A5
SMAD2
SMAD4
SMAP1
SMARCA4
SMARCB1
SMC1A
SMC3
SNX25
SOS1
SOX17
SOX9
SP8
SPEN
SPOP
SSX5
STAG2
STK11
STK19
STX2
TAP1
TBC1D12
TBL1XR1
TBX3
TCAP
TCEB1
TCF7L2
TCP11L2
TDRD10
TET2
TGFBR2
TIMM17A
TM4SF1
TMCO2
TMED10
TMEM30B
TMEM88
TMEM92
TNF
TNFRSF14
TP53
TP53BP1
TPX2
TRAF3
TRAT1
TRIM23
TRIM6-TRIM34
TSC1
TTLL9
TXLNA
TXNDC8
U2AF1
UBC
UBXN4
UPP1
USO1
VHL
WASF3
WT1
XCL1
XIRP2
XPO1
ZFHX3
ZFP36L1
ZNF180
ZNF471
ZNF483
ZNF492
ZNF620
ZNF706
ZNF750
ZRANB3
HLA-A
HLA-B
HLA-C
