# Supplementary material for: Genomic landscape associated with potential response to anti-CTLA-4 treatment in cancers
Source: Nat Commun. 2017 Oct 19;8:1050. doi: 10.1038/s41467-017-01018-0 (PMC5648801; doi:10.1038/s41467-017-01018-0)
Supplement: Supplementary file 9 — Supplementary Data 6 [file 41467_2017_1018_MOESM9_ESM.xlsx]

## Sheet: SD6
Supplementary Data 6. Somatic mutations significantly associated with immune signature score
		Pan-cancer																LUAD							KIRC							CESC							HNSC							STAD
Gene	Locus	Freqeuncy	Immune scores of tumors					Total number of muations in tumors					Chromosomal instability scores of tumors					Freqeuncy	IS score		Number of mutation		CIN score		Freqeuncy	IS score		Number of mutation		CIN score		Freqeuncy	IS score		Number of mutation		CIN score		Freqeuncy	IS score		Number of mutation		CIN score		Freqeuncy	IS score		Number of mutation
			mean_ mutation	mean_WT	fold_change	Wilcox_P	FDR	mean_ mutation	mean_WT	fold_change	Wilcox_P	FDR	mean_ mutation	mean_WT	fold_change	Wilcox_P	FDR		fold_change	Wilcox_P	fold_change	Wilcox_P	fold_change	Wilcox_P		fold_change	Wilcox_P	fold_change	Wilcox_P	fold_change	Wilcox_P		fold_change	Wilcox_P	fold_change	Wilcox_P	fold_change	Wilcox_P		fold_change	Wilcox_P	fold_change	Wilcox_P	fold_change	Wilcox_P		fold_change	Wilcox_P	fold_change
CNKSR1	1p35.3	0.0107143	0.504939	0.392458	1.28661	0.000200269	0.00376635	3810.58	176.928	21.5374	6.03e-30	6.07e-29	2995.81	3269.31	0.916341	0.774072	0.964929	0.0130435	1.19416	0.325814	2.4343	0.0747907	1.11315	0.64971	0	NA	NA	NA	NA	NA	NA	0.0208333	1.19674	0.265325	4.64959	0.0623085	0.997364	0.894204	0.00358423	1.51601	0.192331	1.73895	0.194452	1.531	0.368027	0.0257353	1.18709	0.171351	3.39522
SPEN	1p36	0.0446586	0.479676	0.390713	1.22769	3.49e-09	8.22e-07	3046.65	160.132	19.0259	2e-79	1.77e-77	2907.44	3278.93	0.886704	0.724378	0.95485	0.0391304	1.17971	0.123354	1.77922	0.185621	1.35075	0.0831891	0.0359712	1.055	0.353751	1.07339	0.391949	0.692501	0.0498416	0.146226	1.37538	1.09e-07	10.3753	8.51e-16	1.16076	0.0636282	0.0394265	1.06143	0.585589	1.16508	0.240244	1.06207	0.940732	0.165493	1.03336	0.394989	5.86628
MTOR	1p36	0.0265415	0.468689	0.392055	1.19547	1.53e-05	0.000609897	3137.56	174.885	17.9407	1.07e-46	2.74e-45	2935.85	3273.35	0.896896	0.31148	0.825194	0.0562771	1.11633	0.23078	2.49034	0.00010482	1.14896	0.377669	0	NA	NA	NA	NA	NA	NA	0.0612245	1.18897	0.0771503	7.49061	0.00129449	1.08427	0.479506	0.0143369	0.886526	0.653129	1.65412	0.595716	0.98819	0.898182	0.0935252	1.17693	0.0105183	6.03029
EPHA2	1p36	0.0173504	0.479131	0.392386	1.22107	0.000162861	0.00331319	4064.13	172.649	23.5399	7.01e-41	1.35e-39	2871.79	3269.81	0.878276	0.54559	0.914847	0.00869565	0.691928	0.213697	3.45361	0.0260528	2.28389	0.0671773	0	NA	NA	NA	NA	NA	NA	0.0466321	1.45247	0.000483381	6.3719	0.000242411	0.932185	0.995045	0.0390071	1.18733	0.136783	1.61693	0.0613849	0.518259	0.0350067	0.0879121	1.08585	0.297294	4.64332
ARID1A	1p36.1	0.0637271	0.4585	0.390335	1.17463	2.58e-09	6.43e-07	1093.73	167.516	6.52911	7.04e-85	7.33e-83	2769.87	3290.54	0.841769	0.0305336	0.544638	0.0735931	0.926736	0.380659	1.56575	0.218981	1.28845	0.22254	0.0289157	1.05939	0.4388	1.32895	0.0029778	1.26435	0.0807702	0.101523	0.717473	0.00292963	3.90993	0.00210946	0.721055	0.0627735	0.0428571	1.05599	0.592184	3.60172	0.00674098	1.00223	0.966574	0.361204	1.23131	3.46e-07	6.77078
FLG	1q21.3	0.164266	0.504749	0.388256	1.30004	1.76e-35	1.84e-31	4682.79	133.624	35.0445	0	0	2766.71	3240.65	0.853752	2.74e-08	4.41e-05	0.34375	0.969875	0.394614	2.77835	7.85e-20	1.24752	0.0765675	0	NA	NA	NA	NA	NA	NA	0.131313	1.09327	0.292768	2.91676	1.62e-05	0.946345	0.806845	0.195876	0.974768	0.600302	2.35405	9.41e-10	1.09212	0.386354	0.299674	1.04729	0.237584	5.4616
SOS1	2p21	0.0145985	0.480056	0.392456	1.22321	0.000434264	0.00642818	2547.7	182.439	13.9647	5.79e-21	2.98e-20	2774.15	3271.97	0.847855	0.590735	0.92956	0.0347826	0.991676	0.791001	1.4072	0.495583	0.997439	0.659373	0.0144578	1.05702	0.670734	1.35373	0.0317023	1.2159	0.362157	0.0259067	0.976701	0.880707	6.28239	0.00413533	0.415449	0.0283633	0.0285714	1.23276	0.112746	1.46355	0.267106	0.454956	0.018991	0.0257353	1.05881	0.600767	7.79048
DNMT3A	2p23	0.020911	0.503643	0.391312	1.28706	7.36e-08	9.83e-06	1200.52	191.619	6.26514	0.106012	0.113093	2147.08	3288.18	0.652969	1.24e-06	0.00118101	0.026087	0.931219	0.71376	1.03618	0.505902	1.26052	0.330568	0	NA	NA	NA	NA	NA	NA	0.0104167	1.45242	0.0888898	7.7355	0.0189104	0.146636	0.026715	0.0285714	1.19365	0.202788	4.84788	0.000125932	1.20255	0.618216	0.0294118	1.33973	0.00865237	5.31139
XIRP2	2q31.1	0.0947964	0.433138	0.391067	1.10758	0.000163888	0.00332388	3616.8	141.138	25.626	3.53e-236	5.29e-233	3531.05	3236.86	1.09089	5.36e-06	0.00386978	0.266932	1.01156	0.87971	3.33448	2.48e-15	1.17156	0.211665	0	NA	NA	NA	NA	NA	NA	0.0625	1.06481	0.395107	3.10391	0.00695988	0.808688	0.54318	0.0925267	0.979235	0.640198	2.06491	0.00225726	1.18237	0.128178	0.192308	0.96248	0.73511	5.29636
CASP8	2q33	0.0172022	0.549302	0.39114	1.40436	6.84e-12	3.18e-09	1067.76	189.194	5.64377	3.96e-27	3.23e-26	2165.75	3285.89	0.659104	0.00188916	0.233604	0.017316	1.13789	0.464097	1.46502	0.664298	1.19019	0.220022	0	NA	NA	NA	NA	NA	NA	0.0518135	1.1921	0.148526	1.64654	0.0269508	1.14064	0.33112	0.078853	1.4009	3.4e-05	0.961179	0.600895	0.270855	2.85e-07	0.0661765	1.22161	0.0076623	4.45328
PBRM1	3p21	0.0406807	0.521048	0.388584	1.34089	1.13e-21	2.14e-18	776.024	188.439	4.11818	0.969207	0.969901	2055.89	3314.19	0.620328	9.77e-07	0.00111399	0.0173913	1.09713	0.665672	3.52499	0.0107451	0.800116	0.936559	0.302158	0.950226	0.0341071	1.13389	0.00462865	1.06825	0.184051	0.0207254	0.662914	0.104446	1.2101	0.044629	0.717059	0.405611	0.0215054	1.15417	0.331111	2.77246	0.206425	0.496963	0.115743	0.0722022	1.33314	0.000127581	6.22016
SLC22A14	3p21.3	0.00860669	0.539925	0.392545	1.37544	9.51e-05	0.00226748	4347.58	179.324	24.2442	2.51e-19	1.12e-18	2794.72	3269.83	0.8547	0.42472	0.87723	0.00869565	1.18806	0.414201	1.29213	0.278649	0.506531	0.361466	0	NA	NA	NA	NA	NA	NA	0.00520833	1.59974	0.125122	4.82468	0.116478	0.798815	0.919702	0.0143369	1.36921	0.0799698	0.824705	0.769236	0.660613	0.367083	0.0110294	1.36371	0.0765144	3.36061
SETD2	3p21.31	0.036055	0.454422	0.39166	1.16024	9.93e-06	0.000458017	1428.75	179.845	7.94435	4.54e-12	1.11e-11	2610.63	3283.79	0.795004	0.00458551	0.316061	0.102128	0.941216	0.341789	0.825162	0.106764	0.60963	0.000555712	0.114286	1.00016	0.895958	1.13206	0.0249184	0.927283	0.733132	0.0310881	0.77452	0.145585	1.84026	0.10314	1.16977	0.359368	0.0285714	0.934046	0.590401	0.856613	0.724691	0.77293	0.351066	0.0581818	1.03359	0.582982	4.85638
TGFBR2	3p22	0.012498	0.488299	0.392614	1.24371	7.2e-05	0.0018373	1569.95	195.246	8.04086	7.11e-17	2.62e-16	2740.57	3272.94	0.837344	0.418329	0.875497	0.00434783	1.51332	0.124469	1.81685	0.219627	2.1227	0.180093	0	NA	NA	NA	NA	NA	NA	0.0260417	0.724984	0.122267	0.636529	0.704538	0.683669	0.395733	0.0358423	1.21776	0.114417	1.60524	0.268871	0.555511	0.0470591	0.0474453	1.13155	0.208766	4.50253
C3orf70	3q27.2	0.00503574	0.539677	0.392879	1.37365	0.000747734	0.00938205	1512.74	197.077	7.67588	4.26e-11	9.56e-11	3115.91	3267.78	0.953525	0.772869	0.96492	0.00869565	0.701374	0.298031	4.84277	0.0175559	2.31796	0.0595849	0.00481928	1.00904	0.912942	0.468018	0.0538292	0.488838	0.485341	0.0208333	0.915372	0.579118	2.55416	0.0495164	1.6657	0.0435292	0.00358423	1.21272	0.589121	1.87487	0.173955	1.43144	0.416068	0.0110294	1.05465	0.908925	1.6861
MUC4	3q29	0.164005	0.63816	0.389611	1.63794	5.86e-144	1.23e-139	3145.83	153.398	20.5076	2.99e-292	7.84e-289	2842.37	3225.6	0.881191	0.0406525	0.587446	0.0643777	1.11371	0.218833	1.28234	0.0821193	0.677671	0.0867571	0	NA	NA	NA	NA	NA	NA	0.358025	1.23753	2.2e-06	4.91218	1.34e-16	1.02841	0.127791	0.0569395	1.0339	0.819571	2.19407	0.0509953	1.14968	0.423759	0.0805861	1.14506	0.0954714	3.27065
MUC7	4q13.3	0.0178253	0.502009	0.392246	1.27983	7.11e-05	0.00182011	1917.66	180.332	10.6341	8.82e-35	1.22e-33	3253.76	3264.3	0.996771	0.863007	0.982798	0.0732759	0.974624	0.824722	2.57697	3.98e-05	1.04383	0.668701	0	NA	NA	NA	NA	NA	NA	0.00520833	1.57318	0.139008	0.318099	0.38153	1.22958	0.515257	0.0143369	1.25715	0.195251	4.62044	0.0752444	0.708494	0.530457	0.0147059	1.30192	0.0978645	7.80728
FRG1	4q35	0.0155566	0.508365	0.392409	1.2955	0.000613056	0.00825576	1329.99	193.414	6.87638	4.13e-11	9.28e-11	2419.47	3278.09	0.738075	0.00219046	0.246204	0.025974	0.929493	0.78297	2.22428	0.0197797	1.81311	0.174251	0	NA	NA	NA	NA	NA	NA	0.00520833	0.826653	0.575942	0.953321	0.376641	1.6656	0.209288	0.00358423	1.39093	0.326647	0.516179	0.441406	2.04033	0.162466	0	NA	NA	NA
FAT1	4q35.2	0.0656654	0.486494	0.389789	1.2481	1.49e-15	1.25e-12	2624.61	153.157	17.1368	2.83e-124	7.8e-122	2527.49	3282.11	0.770083	7.62e-06	0.00515049	0.108225	1.03066	0.78033	1.93856	6.92e-05	1.24045	0.227871	0	NA	NA	NA	NA	NA	NA	0.0666667	0.933065	0.409886	1.35765	0.0393735	0.852539	0.792069	0.261905	1.08128	0.122986	1.18126	0.000299116	0.864079	0.0280284	0.15917	0.943852	0.529872	8.56635
RASA1	5q13	0.0141211	0.478092	0.392422	1.21831	0.000298179	0.00497852	1233.41	190.716	6.46727	1.43e-26	1.11e-25	2637.13	3275.93	0.805	0.166667	0.750915	0.0130435	1.19799	0.288605	1.72731	0.555494	1.0037	0.779871	0	NA	NA	NA	NA	NA	NA	0.0208333	0.827226	0.34664	3.46175	0.0784888	0.683826	0.408328	0.0430108	0.873343	0.288024	1.19061	0.517397	1.01007	0.779641	0.0625	1.04074	0.622734	2.96419
HLA-A	6p21.3	0.0112104	0.543014	0.391966	1.38536	6.68e-09	1.36e-06	646.449	198.567	3.25557	7.03e-21	3.6e-20	1983.2	3282.35	0.6042	0.000637872	0.137236	0.0217391	1.13174	0.42658	1.41601	0.286029	1.23666	0.289115	0.00240964	0.750512	0.244239	0.520755	0.171946	0.46456	0.617732	0.0260417	1.12951	0.475511	2.68775	0.0353823	0.910404	0.917511	0.046595	1.2766	0.0240311	1.25212	0.232689	0.626339	0.0548062	0.0441176	1.18344	0.0715966	2.49818
HLA-B	6p21.3	0.011694	0.552278	0.391896	1.40925	8.21e-10	2.36e-07	825.681	196.307	4.20607	6.09e-25	4.24e-24	2027.02	3281.78	0.617661	0.001348	0.198793	0.00869565	1.06719	0.777294	0.859774	0.851828	1.62612	0.229846	0	NA	NA	NA	NA	NA	NA	0.046875	1.2938	0.0230034	2.50191	0.0864784	0.839467	0.814871	0.05	1.24566	0.041659	2.76044	0.0120956	0.708065	0.20838	0.0695971	1.15953	0.0672371	2.91988
HLA-C	6p21.3	0.00438668	0.589889	0.392795	1.50177	8.55e-06	0.000409551	1059.26	199.818	5.30112	6.9e-14	1.97e-13	2351.84	3271.36	0.718916	0.0543292	0.621562	0.00434783	0.920336	0.740376	0.55061	0.797914	0.201011	0.175248	0	NA	NA	NA	NA	NA	NA	0.015625	1.17137	0.466738	1.28257	0.297427	1.64845	0.12684	0.00358423	1.60426	0.158761	3.45578	0.0973985	0.00185858	0.0901108	0.0330882	1.31857	0.00953967	3.73624
HIST1H1E	6p22.1	0.00843745	0.546788	0.392746	1.39222	2.81e-05	0.000946844	1435.25	194.629	7.37428	1.62e-17	6.27e-17	3753.13	3263.35	1.15008	0.0329681	0.554435	0.00869565	0.909584	0.781388	1.21664	0.378554	1.40237	0.355878	0	NA	NA	NA	NA	NA	NA	0.0104167	1.26332	0.347124	4.60257	0.0311294	0.860726	0.974083	0.00358423	0.595868	0.299847	0.311629	0.168133	0.569864	0.615065	0.0257353	0.799892	0.173648	5.01808
FAM8A1	6p23	0.00503492	0.554677	0.3929	1.41175	0.000471205	0.00685669	758.613	200.776	3.77841	4.28e-05	5.75e-05	2613.58	3269.58	0.799361	0.152168	0.736721	0.00434783	1.4051	0.205808	0.760155	0.856572	1.1801	0.527007	0	NA	NA	NA	NA	NA	NA	0	NA	NA	NA	NA	NA	NA	0.00358423	0.879444	0.728098	1.26697	0.288414	1.9764	0.18196	0.00735294	0.654796	0.253738	1.14407
SGK1	6q23	0.00906736	0.688696	0.392581	1.75428	4.41e-16	4.86e-13	2927.91	194.902	15.0225	4.34e-16	1.49e-15	2350.89	3266.01	0.719806	0.0199734	0.505066	0	NA	NA	NA	NA	NA	NA	0.00722892	1.04909	0.934545	0.815704	0.457961	3.97683	0.0199282	0.00520833	1.35713	0.303747	11.9693	0.086515	1.84217	0.150203	0	NA	NA	NA	NA	NA	NA	0.014652	1.09206	0.598652	2.02002
CARD11	7p22	0.027989	0.460867	0.391703	1.17657	0.000518614	0.00730802	3685.26	164.238	22.4386	2.64e-61	1.24e-59	3340.66	3270.17	1.02155	0.710582	0.951061	0.0606061	1.00328	0.990123	1.62191	0.00511546	1.01783	0.799679	0	NA	NA	NA	NA	NA	NA	0.0260417	0.939618	0.735045	3.68916	0.00535462	0.833339	0.718533	0.0107527	0.9554	0.820714	0.923875	0.557635	2.18607	0.0761579	0.0693431	1.21402	0.0160893	7.10996
PTPN12	7q11.23	0.00925475	0.519596	0.392697	1.32315	0.000116214	0.00262692	1827.42	190.524	9.59156	1.88e-20	9.31e-20	2436.45	3274.13	0.744149	0.114234	0.701723	0.00869565	0.926653	0.835125	1.21824	0.221664	0.55783	0.484485	0	NA	NA	NA	NA	NA	NA	0.0259067	0.899441	0.58678	3.78037	0.0413291	1.14178	0.386846	0.0107527	0.326872	0.00854888	1.45783	0.192842	1.23101	0.389935	0.0294118	1.08115	0.412845	4.78684
MUC17	7q22	0.128973	0.501842	0.389227	1.28933	3.53e-27	2.46e-23	4281.36	133.806	31.9967	2.06e-285	4.8e-282	2968.67	3253.71	0.912396	0.437026	0.88241	0.27668	1.09518	0.0343957	2.70019	1.91e-15	1.14451	0.197194	0	NA	NA	NA	NA	NA	NA	0.0964467	1.19254	0.025406	4.3183	1.52e-05	1.02675	0.490347	0.115385	1.02552	0.757453	3.19432	5.26e-05	1.277	0.111583	0.169611	1.02048	0.63744	5.29807
CUX1	7q22.1	0.0239637	0.460264	0.39214	1.17372	0.00015804	0.00322882	3768.03	171.725	21.9422	4.12e-57	1.66e-55	3597.45	3256.9	1.10456	0.969913	0.997266	0.038961	0.91541	0.449902	1.73158	0.0492362	1.33031	0.144918	0	NA	NA	NA	NA	NA	NA	0.015625	1.04324	0.891715	3.37078	0.022436	1.41913	0.325067	0.0501792	1.06575	0.592433	2.90988	4e-05	1.0706	0.855712	0.0912409	1.1495	0.0325197	4.57357
EZH2	7q35	0.0100584	0.503742	0.392915	1.28206	0.000471812	0.00686075	2355.94	190.125	12.3915	3.66e-19	1.62e-18	2870.09	3268.7	0.878051	0.82745	0.977216	0.0173913	0.880222	0.536693	3.60157	0.00261672	1.7259	0.0767176	0	NA	NA	NA	NA	NA	NA	0.0207254	1.04491	0.906391	2.0234	0.19427	0.774453	0.470683	0.00358423	1.11654	0.770452	1.44039	0.230843	0.165612	0.198765	0.0183824	0.983407	0.931409	4.80066
RIMS2	8q22.3	0.0473582	0.445051	0.391429	1.13699	0.000105184	0.00245163	3706.77	157.742	23.4989	4.35e-107	8e-105	3450.06	3253.41	1.06044	0.0231725	0.522341	0.135593	1.04793	0.390238	2.73793	1.14e-09	1.06457	0.660923	0	NA	NA	NA	NA	NA	NA	0.0310881	1.31403	0.0466011	2.95896	0.0307173	0.884781	0.877099	0.0569395	0.907013	0.33551	1.8763	0.0233093	1.36404	0.146357	0.160142	1.0596	0.24891	5.02546
CDKN2A	9p21	0.0374757	0.449299	0.39157	1.14743	2.89e-05	0.00095991	534.346	192.377	2.7776	2.43e-44	5.59e-43	3464.14	3260.14	1.06257	0.00653434	0.359418	0.0347826	1.10863	0.36213	1.151	0.967644	1.0757	0.594227	0.0120482	1.12679	0.335015	1.02213	0.916276	1.43884	0.281851	0.0208333	0.771173	0.365595	1.64601	0.172577	1.04819	0.627664	0.217857	1.01574	0.865124	1.27984	0.416943	1.05926	0.910316	0.0510949	0.975895	0.825978	2.07945
ZNF483	9q32	0.0108625	0.495075	0.392556	1.26116	0.000153522	0.00321167	7613.45	183.686	41.4481	9.18e-32	1.04e-30	2828.06	3267.03	0.865635	0.0949907	0.684335	0.00869565	1.16901	0.504712	1.50308	0.140767	1.44537	0.344866	0	NA	NA	NA	NA	NA	NA	0.0208333	1.26444	0.16006	4.6827	0.00228271	0.914603	0.922724	0.0107527	1.34024	0.153261	2.36276	0.529005	0.459695	0.211945	0.029304	1.17016	0.115279	4.8297
NOTCH1	9q34.3	0.0333172	0.469359	0.391488	1.19891	8.61e-07	7.18e-05	1338.95	189.289	7.07355	4.89e-41	9.47e-40	3318.52	3261.01	1.01764	0.410225	0.871691	0.0434783	0.925753	0.527573	1.66964	0.0212603	1.24942	0.513386	0.0120482	0.98846	0.727192	0.790462	0.273766	0.641867	0.278493	0.0765306	0.969947	0.745585	2.06248	0.0204134	1.02689	0.670129	0.197183	1.17425	0.00721529	1.05319	0.252966	0.667927	0.000449204	0.0797101	1.07372	0.348075	4.79174
FAM166A	9q34.3	0.00503492	0.524935	0.393036	1.33559	0.000764099	0.00949077	2087.87	197.671	10.5623	3.53e-08	6.15e-08	3241.93	3267.34	0.992225	0.984077	0.998622	0.00869565	0.882095	0.631009	1.39187	0.553597	1.51814	0.217659	0	NA	NA	NA	NA	NA	NA	0	NA	NA	NA	NA	NA	NA	0.00716846	1.47856	0.106533	7.58947	0.0181953	0.450196	0.313898	0.0220588	1.17823	0.188634	1.97874
ATM	11q22	0.0448532	0.45409	0.391308	1.16044	6.81e-06	0.000346782	1786.45	164.641	10.8506	4.53e-51	1.43e-49	2995.58	3269.53	0.916212	0.107195	0.69814	0.0987124	0.860987	0.0442088	1.17385	0.143008	1.05867	0.300877	0.0358852	1.05443	0.239401	1.21453	0.0292841	0.920022	0.569564	0.0572917	1.19485	0.113128	5.44025	0.00127428	0.874136	0.599103	0.0321429	0.855355	0.370538	0.812898	0.780807	1.02685	0.860495	0.134276	1.12376	0.025783	7.21035
KRAS	12p12.1	0.0551679	0.455335	0.390118	1.16717	1.51e-09	4e-07	363.821	194.472	1.87081	1.89e-27	1.58e-26	2311.21	3324.36	0.695236	3.71e-06	0.00298643	0.329004	1.01345	0.778067	1.01157	0.0654889	0.817963	0.179555	0	NA	NA	NA	NA	NA	NA	0.0572917	0.795984	0.130625	0.565231	0.212686	0.557061	0.0334234	0.00358423	1.60426	0.158761	3.45578	0.0973985	0.00185858	0.0901108	0.0882353	0.895182	0.265775	2.67504
CHD4	12p13	0.0293117	0.453901	0.39205	1.15776	0.000179775	0.00349769	1559.46	177.089	8.80608	3.55e-46	8.89e-45	2759.38	3277.24	0.841983	0.175776	0.75944	0.026087	0.825888	0.144009	2.16895	0.0657288	1.15123	0.603674	0.0144578	1.03931	0.803693	1.22038	0.289768	0.907975	0.965649	0.0416667	1.00491	0.870927	3.76869	0.00800809	1.0557	0.581317	0.0250896	1.14796	0.323723	1.57923	0.0450127	0.780756	0.577211	0.101083	1.13772	0.0370559	5.96567
MBD6	12q13.2	0.0113507	0.4923	0.392883	1.25304	0.000137867	0.00296293	1232.16	195.803	6.29285	3.96e-23	2.42e-22	2857.03	3269.97	0.873716	0.652275	0.942606	0	NA	NA	NA	NA	NA	NA	0	NA	NA	NA	NA	NA	NA	0.0360825	1.23452	0.0686939	7.09686	0.000799629	1.16845	0.297683	0.0215054	1.29251	0.0784738	3.0249	0.332379	0.497842	0.109938	0.103571	1.12915	0.0647606	4.55598
POLE	12q24.3	0.0265072	0.459348	0.392441	1.17049	0.000165131	0.00332388	2984.86	166.029	17.9779	1.58e-60	7.22e-59	2763.62	3269.44	0.845289	0.0639325	0.638729	0.0562771	1.04169	0.747035	2.20756	0.000448765	1.35675	0.160497	0	NA	NA	NA	NA	NA	NA	0.0310881	0.697126	0.053086	4.23613	0.0741407	0.637086	0.23776	0.0179211	0.755524	0.22808	2.4584	0.0489754	1.227	0.412566	0.0824373	0.937113	0.593209	9.95851
SACS	13q11	0.0550916	0.438638	0.391719	1.11978	0.000219284	0.0040239	2978.16	150.23	19.8239	3.25e-115	7.39e-113	3079.19	3262.9	0.943697	0.914365	0.99119	0.0735931	0.930753	0.476057	2.42109	0.00100216	1.46572	0.254028	0	NA	NA	NA	NA	NA	NA	0.03125	1.02553	0.931595	3.96447	0.00185432	1.0491	0.473552	0.0394265	0.935195	0.579051	2.27964	0.103906	1.19806	0.244092	0.219931	0.991668	0.863125	7.92239
CHD8	14q11.2	0.0281008	0.449793	0.392293	1.14658	0.000785906	0.00965857	5591.98	167.181	33.4486	3.01e-63	1.53e-61	2529.83	3278.53	0.771635	0.0485123	0.60955	0.0562771	1.04498	0.488877	1.7316	0.027794	0.852297	0.24959	0.00481928	0.905717	0.646956	0.885819	0.787836	1.32367	0.233807	0.0564103	1.01074	0.71866	4.75095	4.18e-05	0.898274	0.86686	0.0215054	0.773185	0.197392	1.39791	0.225396	0.65687	0.317309	0.0620438	1.119	0.154064	6.89087
TP53BP1	15q15	0.0226721	0.466393	0.392232	1.18907	0.000228045	0.00414796	2750.1	169.946	16.1822	1.86e-48	5.2e-47	2841.73	3271.23	0.868703	0.214058	0.779719	0.0217391	1.24156	0.131408	2.82643	0.00422508	1.12409	0.754597	0	NA	NA	NA	NA	NA	NA	0.046875	0.993669	0.91681	3.13358	0.0560183	0.468351	0.0094772	0.0358423	1.14245	0.3291	1.92306	0.00904124	1.13465	0.602443	0.0652174	1.26612	0.00196475	6.53052
B2M	15q21.1	0.0124717	0.636065	0.391283	1.62559	2.12e-17	2.96e-14	1305.66	194.085	6.72727	2.65e-28	2.36e-27	1728.37	3280.51	0.52686	0.000116	0.0433779	0.00434783	1.63495	0.0887624	3.44139	0.120819	0.570887	0.587672	0.00480769	0.874145	0.387767	1.14739	0.390604	2.17039	0.0523729	0.015625	0.890287	0.644968	2.64059	0.0897968	0.638297	0.421838	0.0143369	1.38226	0.0549346	0.921347	0.932844	0.576361	0.276062	0.0918728	1.35434	3.49e-06	4.94752
CREBBP	16p13.3	0.034784	0.461572	0.391322	1.17952	8.56e-06	0.000409551	2230.22	166.431	13.4003	1.06e-67	6.26e-66	3249.46	3261.5	0.996308	0.515405	0.905651	0.04329	0.822181	0.075815	1.95274	0.230219	1.53403	0.209327	0	NA	NA	NA	NA	NA	NA	0.0769231	1.20221	0.056499	4.35835	8.97e-06	0.871164	0.574555	0.0501792	0.864146	0.26639	1.09064	0.606604	1.12169	0.388911	0.131673	1.09276	0.110305	6.21943
ZFHX3	16q22.3	0.0464142	0.446701	0.392099	1.13926	0.000151139	0.0031797	3028.91	157.426	19.2403	1.13e-76	8.92e-75	2701.27	3279.83	0.823603	0.00197124	0.234544	0.0391304	1.0722	0.536323	2.57667	0.00696745	1.46134	0.145253	0	NA	NA	NA	NA	NA	NA	0.0572917	1.07031	0.53322	4.86983	0.000268815	0.60492	0.0955297	0.0322581	1.1329	0.434724	1.39143	0.101009	0.729708	0.456012	0.188356	1.18091	0.000669952	9.38995
PLCG2	16q24.1	0.0191	0.476864	0.392203	1.21586	0.000177962	0.00347531	5184.75	171.622	30.2103	5.07e-50	1.5e-48	2888.44	3269.36	0.883487	0.0820796	0.672962	0.0304348	0.912572	0.601615	1.87934	0.0235578	1.69754	0.0367713	0	NA	NA	NA	NA	NA	NA	0.0259067	0.969491	0.829791	3.43985	0.0214596	1.55437	0.181839	0.0143369	0.956621	0.814929	2.65786	0.010029	1.29318	0.367083	0.0547445	1.19269	0.0276725	7.36374
CDC27	17q21.32	0.0267077	0.499945	0.392061	1.27517	1.12e-06	8.81e-05	1326.28	186.905	7.09603	4.86e-18	1.96e-17	2853.49	3273.68	0.871646	0.0779586	0.659121	0.0217391	1.10698	0.536326	1.79192	0.525189	0.711113	0.531861	0.00722892	0.888553	0.353637	1.65883	0.0304824	1.87733	0.306849	0.0310881	0.818427	0.325206	1.45148	0.462286	1.25738	0.136251	0.0178571	0.943238	0.704714	5.56235	0.00271477	1.34375	0.340602	0.0110294	1.52811	0.0144219	7.17182
SPOP	17q21.33	0.0110282	0.274118	0.394702	0.694493	3.21e-06	0.000194599	319.647	203.096	1.57387	0.000118778	0.000154522	2375.47	3274.76	0.725387	0.00919955	0.401166	0.00869565	1.13854	0.597265	0.140038	0.0310801	0.0837247	0.0220537	0	NA	NA	NA	NA	NA	NA	0.00520833	0.241072	0.09693	0.392613	0.651937	0.00136162	0.0865753	0.0107527	0.940319	0.868571	0.467703	0.116784	0.993743	0.787321	0.0110294	1.21326	0.277962	2.38732
RNF43	17q23.2	0.0265329	0.507244	0.39144	1.29584	2.13e-10	7.19e-08	1585.87	172.906	9.17189	1.28e-64	6.84e-63	1798.74	3296.02	0.545732	2.28e-09	5.3e-06	0.0130435	1.17243	0.382442	1.74587	0.594188	0.451387	0.19918	0	NA	NA	NA	NA	NA	NA	0.00520833	1.49921	0.187801	2.30407	0.134248	0.750223	0.833058	0.00358423	1.30692	0.437737	11.9276	0.0854904	0.800366	0.955443	0.19788	1.19659	0.000375092	5.86789
AXIN2	17q24.1	0.0120071	0.506351	0.392436	1.29028	4.24e-05	0.00125896	3147.73	179.097	17.5756	1.92e-26	1.49e-25	2231.21	3278.36	0.680588	0.00325509	0.279773	0.00869565	1.09762	0.700796	1.79095	0.148105	1.02241	0.927712	0.00240964	1.42624	0.121518	0.886063	0.850893	0.171223	0.13876	0.015544	0.761132	0.373099	1.93985	0.0629531	1.32201	0.185893	0.0143369	1.01859	0.917969	1.10859	0.31793	1.03995	0.908069	0.0514706	1.11037	0.255434	5.86602
ZNF750	17q25.3	0.0131408	0.524272	0.392534	1.33561	1.28e-06	9.85e-05	1447.77	191.361	7.56562	8.88e-37	1.37e-35	2776.11	3269.78	0.849019	0.544764	0.91465	0	NA	NA	NA	NA	NA	NA	0	NA	NA	NA	NA	NA	NA	0.0569948	1.33269	0.00504266	4.71482	0.000302539	0.708629	0.117653	0.0392857	1.10533	0.459965	2.02877	0.000285533	1.08764	0.927353	0.0257353	0.984439	1	5.15382
SMAD4	18q21.1	0.0191434	0.454	0.392512	1.15665	0.000523951	0.00737332	553.025	197.219	2.80412	1.16e-14	3.55e-14	2527.41	3281.38	0.770229	0.246763	0.795355	0.0304348	0.813538	0.10941	0.70657	0.36662	0.957794	0.94481	0.00240964	0.570347	0.109928	1.35669	0.298271	3.15506	0.111955	0.0414508	1.06756	0.69093	3.07248	0.12627	0.92303	0.392885	0.0215054	0.823738	0.308719	1.71452	0.161044	0.915633	0.888134	0.0942029	1.05696	0.520333	1.0927
ALPK2	18q21.31	0.0420613	0.458527	0.391735	1.1705	0.000322319	0.00524777	6575.85	155.458	42.2998	4.46e-105	7.92e-103	2855.55	3268.97	0.873534	0.0906493	0.681917	0.102564	0.895427	0.195693	2.21851	4.61e-05	1.69613	0.0115454	0.0168675	1.05118	0.461892	1.12705	0.795449	0.55182	0.24353	0.0364583	1.16709	0.241586	3.27207	0.00216795	0.708236	0.295757	0.0250896	1.34009	0.0294297	3.05617	0.18639	0.520623	0.0872023	0.0695971	1.19632	0.0203618	5.38917
ZNF492	19p13.11	0.0126336	0.53709	0.392949	1.36682	1.74e-05	0.000663879	4517.86	180.043	25.0932	5.77e-31	6.21e-30	3044.43	3265.09	0.932419	0.491851	0.899506	0.0391304	1.06389	0.593302	1.86555	0.0365967	0.874715	0.902382	0	NA	NA	NA	NA	NA	NA	0.0104167	1.07686	0.842834	0.482453	0.682292	1.12767	0.545664	0.00358423	0.129938	0.0854943	0.904573	0.65488	2.19374	0.144591	0.025641	1.12377	0.517337	2.56741
CEBPA	19q13.1	0.00422009	0.626923	0.392958	1.5954	1.97e-07	2.23e-05	408.769	202.524	2.01837	1.64e-06	2.46e-06	823.793	3274.51	0.251578	1.22e-06	0.00118101	0	NA	NA	NA	NA	NA	NA	0.00240964	1.51409	0.0870428	0.46862	0.143726	0.181379	0.147932	0.0104167	1.46007	0.0808016	9.54199	0.0176502	1.00074	0.953368	0	NA	NA	NA	NA	NA	NA	0	NA	NA	NA
CIC	19q13.2	0.0162338	0.47469	0.392539	1.20928	0.000316103	0.00516664	2125.59	179.566	11.8374	6.05e-37	9.43e-36	3126.67	3267.2	0.956985	0.987433	0.998864	0.0130435	1.04745	0.827155	3.27448	0.00733252	1.75913	0.0569098	0	NA	NA	NA	NA	NA	NA	0.0416667	1.07341	0.569571	5.2534	0.000684027	0.932673	0.913225	0.0143369	1.24466	0.255944	1.83973	0.00694088	0.645994	0.383895	0.0912409	1.19342	0.00983885	4.56593
DHDH	19q13.3	0.00616083	0.577684	0.393101	1.46956	2.42e-05	0.000861881	7725.29	189.769	40.7089	1.65e-15	5.39e-15	1566.2	3272.61	0.478578	0.000376088	0.0991146	0.00869565	0.892521	0.814351	0.823093	0.76098	1.53932	0.704758	0	NA	NA	NA	NA	NA	NA	0.00520833	0.520278	0.21986	10.9959	0.0898799	0.00483023	0.0935252	0	NA	NA	NA	NA	NA	NA	0.0147059	1.42072	0.0197607	2.62612
ASXL1	20q11	0.0214147	0.477674	0.391936	1.21876	2.15e-05	0.000783246	1276.58	185.52	6.88112	5.72e-27	4.62e-26	3330.72	3265.71	1.01991	0.772698	0.96492	0.0173913	1.06158	0.767502	3.28683	0.00509382	1.07008	0.614187	0.00963855	1.17341	0.128369	1.47964	0.0274354	0.65781	0.504672	0.0208333	1.03021	0.989118	1.95785	0.326071	0.657619	0.353168	0.0322581	0.933951	0.635101	1.22491	0.375545	0.857734	0.754379	0.047619	1.27186	0.0104868	6.18638
EP300	22q13.2	0.0310579	0.4675	0.391702	1.19351	2.11e-05	0.000772596	1848.82	170.027	10.8737	5.54e-59	2.41e-57	3370.93	3261.64	1.03351	0.625949	0.938092	0.00434783	1.03188	1	3.65299	0.117253	1.29019	0.442407	0	NA	NA	NA	NA	NA	NA	0.126904	1.10517	0.203121	2.47996	4.07e-05	1.34761	0.0500752	0.0681004	1.36024	0.000431851	1.69835	0.0984494	0.845895	0.156987	0.0654545	1.10408	0.259237	4.75453
DDX3X	Xp11.3	0.0121773	0.487693	0.392552	1.24237	0.000706442	0.00902167	1451.33	188.713	7.69068	5.36e-28	4.66e-27	3394.2	3266.25	1.03917	0.911246	0.990629	0.0130435	1.24212	0.190159	2.55227	0.0226322	0.662974	0.66233	0	NA	NA	NA	NA	NA	NA	0.0208333	1.20446	0.273207	2.81615	0.103594	0.61378	0.158877	0.00714286	1.64532	0.0343012	3.03831	0.0229484	0.102685	0.0543937	0.0330882	1.25002	0.041517	3.2459
BCOR	Xp11.4	0.0209246	0.469597	0.392285	1.19708	9.3e-05	0.00224498	761.271	193.551	3.93318	2.91e-22	1.66e-21	2786.31	3273.68	0.851126	0.200159	0.77463	0.0217391	1.04673	0.746862	1.14633	0.182896	0.756357	0.615068	0.00722892	0.946626	0.531565	0.955513	0.963362	0.81391	0.947748	0.03125	1.37227	0.0185246	5.59082	0.000793032	0.753065	0.409707	0.0214286	0.833405	0.32528	0.69454	0.556078	0.928209	0.981702	0.0830325	1.2333	0.00346134	3.74288
MXRA5	Xp22.33	0.0611138	0.463833	0.390586	1.18753	6.33e-09	1.31e-06	3966.9	151.599	26.167	1.37e-156	7.2e-154	3538.61	3245.75	1.09023	0.0040432	0.300243	0.179916	1.09826	0.0537185	2.97261	5.57e-14	1.33751	0.0728302	0	NA	NA	NA	NA	NA	NA	0.0572917	1.4265	0.000316178	1.99914	0.00396644	0.720532	0.284359	0.0358423	1.01689	0.974526	1.64086	0.00387817	1.17971	0.463901	0.101083	1.19956	0.00810913	4.99671
Abbreviation: BLCA, bladder urothelial carcinoma; BRCA, breast cancer; CESC, cervical & endocervical cancer; COAD, colon & rectal adenocarcinoma; ESCA, esophageal carcinoma; FDR; false discovery rate; GBM, glioblastoma multiforme; HNSC, head & neck squamous cell carcinoma; KIRC, kidney clear cell carcinoma; LIHC, liver hepatocellular carcinoma; LUAD, lung adenocarcinoma; LUSC, lung squamous cell …
[truncated: 73 more columns]
