# Supplementary material for: Genomic landscape associated with potential response to anti-CTLA-4 treatment in cancers
Source: Nat Commun. 2017 Oct 19;8:1050. doi: 10.1038/s41467-017-01018-0 (PMC5648801; doi:10.1038/s41467-017-01018-0)
Supplement: Supplementary file 10 — Supplementary Data 7 [file 41467_2017_1018_MOESM10_ESM.xlsx]

## Sheet: SD7
Supplementary Data 7. Amplified genes significantly associated with immune signature score
		Pan-cancer																LUAD							KIRC							CESC							HNSC							STAD
Gene	Locus	Freqeuncy	Immune scores of tumors					Total number of mutations in tumors					Chromosomal instability scores of tumors					Freqeuncy	IS score		Number of mutation		CIN score		Freqeuncy	IS score		Number of mutation		CIN score		Freqeuncy	IS score		Number of mutation		CIN score		Freqeuncy	IS score		Number of mutation		CIN score		Freqeuncy	IS score		Number of mutation
			mean_ amplification	mean_unaltered	fold_change	Wilcox_P	FDR	mean_ amplification	mean_unaltered	fold_change	Wilcox_P	FDR	mean_ amplification	mean_unaltered	fold_change	Wilcox_P	FDR		fold_change	Wilcox_P	fold_change	Wilcox_P	fold_change	Wilcox_P		fold_change	Wilcox_P	fold_change	Wilcox_P	fold_change	Wilcox_P		fold_change	Wilcox_P	fold_change	Wilcox_P	fold_change	Wilcox_P		fold_change	Wilcox_P	fold_change	Wilcox_P	fold_change	Wilcox_P		fold_change	Wilcox_P	fold_change
MYOC	1q23	0.0559988	0.360522	0.400554	0.900056	0.000774873	0.0118276	183.596	213.459	0.860101	0.0324749	0.0757228	5421.17	3703.08	1.46396	1.48543e-26	2.15474e-25	0.0821918	0.903054	0.0801968	0.756827	0.669818	1.0904	0.351794	0.00641026	1.14249	0.52415	1.13134	0.471633	0.472459	0.531867	0.0284553	1.01761	0.912035	0.998799	0.702308	1.32945	0.0302876	0.0174672	0.778709	0.137223	1.72648	0.0444172	2.04397	0.000480918	0.0192308	0.816979	0.128569	0.725114
MDM4	1q32	0.0564504	0.365312	0.400287	0.912625	0.00365574	0.0330422	197.509	212.682	0.928658	0.319544	0.421948	4785.34	3740.3	1.2794	2.68774e-13	1.30931e-12	0.086758	0.854786	0.00931527	0.756509	0.650233	1.11622	0.211605	0.00641026	1.14782	0.357543	0.681668	0.175969	0.575946	0.828793	0.0162602	0.837933	0.624962	1.84141	0.0431816	1.0906	0.355217	0.0131004	1.04431	0.829153	1.44641	0.100168	2.20556	0.00212458	0.0192308	1.02907	0.856088	0.658124
AKT3	1q44	0.0575041	0.368207	0.400149	0.920173	0.0108553	0.0674138	175.653	214.036	0.820671	0.227184	0.325773	4910.47	3731.49	1.31595	6.58392e-14	3.39133e-13	0.0913242	0.881555	0.0356847	1.06593	0.928775	1.13126	0.212953	0.00641026	0.998647	0.934194	0.787848	0.56023	1.44261	0.927944	0.0284553	0.781149	0.27398	1.34371	0.175109	0.971239	0.698019	0.0196507	0.912837	0.637048	1.40523	0.150644	1.79262	0.00271007	0.021978	0.720249	0.0258239	0.267296
FLT4	5q34	0.0246876	0.510421	0.395475	1.29065	1.48798e-11	1.35538e-09	80.2581	215.525	0.372385	3.61558e-20	1.04284e-18	2889.74	3822.31	0.756019	4.74705e-06	7.93449e-06	0.0228311	0.967345	0.615915	0.221764	0.0682887	0.945345	0.805372	0.278846	1.11594	0.0063118	0.893723	0.136644	0.66859	0.0040283	0.00813008	0.91935	0.837927	NA	NA	0.369149	0.141097	0.00218341	0.42225	0.188152	0.847753	0.766813	0.826461	1	0.00824176	0.885583	0.64152	1.44797
E2F3	6p22	0.0319133	0.348038	0.39997	0.87016	0.000620997	0.0101624	283.982	209.834	1.35337	3.45987e-08	5.62478e-07	6138.93	3722.16	1.64929	4.09565e-24	4.88795e-23	0.0182648	0.696842	0.0311572	1.58677	0.645141	1.81141	0.0168936	0	NA	NA	NA	NA	NA	NA	0.0162602	1.27534	0.161757	0.692746	0.614056	2.08863	0.200989	0.00436681	0.99099	0.963701	0.707934	0.815004	1.11964	0.494829	0.00824176	0.954407	0.827713	0.197867
EGFR	7p12	0.0483215	0.35257	0.400635	0.880028	0.000343278	0.00646773	177.751	213.558	0.83233	0.0244069	0.0613852	4489.55	3764.24	1.19269	3.39803e-09	9.08585e-09	0.06621	0.848807	0.0237933	0.96043	0.271694	1.31905	0.0168725	0	NA	NA	NA	NA	NA	NA	0.0243902	0.915154	0.579091	0.340211	0.0784089	1.07661	0.342273	0.120087	0.842241	0.00670117	0.836031	0.359657	1.13501	0.491786	0.0631868	0.963484	0.560927	0.388216
PLAT	8p11.21	0.0492247	0.347887	0.400923	0.867714	3.02062e-05	0.00088988	154.427	214.605	0.719584	0.62743	0.701752	5766.87	3697.42	1.5597	4.24238e-27	6.50831e-26	0.06621	0.910078	0.166668	1.23191	0.106471	1.41074	0.0402727	0	NA	NA	NA	NA	NA	NA	0.0121951	0.82045	0.47	0.102513	0.0241175	2.46742	0.14394	0.0393013	0.816377	0.0808089	0.756319	0.936309	1.34502	0.0301265	0.0274725	0.946396	0.857307	0.337483
FGFR1	8p11.23	0.0630739	0.344558	0.401931	0.857257	8.77591e-07	3.30947e-05	154.414	215.43	0.716773	0.132149	0.213409	5423.66	3689.94	1.46985	7.47949e-29	1.38603e-27	0.0410959	0.742019	0.00123909	1.81526	0.0242654	2.11179	7.99093e-05	0.00641026	0.815233	0.205492	0.629889	0.255159	1.28142	0.28664	0.0121951	0.728902	0.367015	0.253635	0.0900134	2.03547	0.0764797	0.0829694	0.838707	0.0267713	1.17654	0.0429063	1.4622	0.000505052	0.0137363	0.944561	0.843932	0.342227
ZBTB10	8q13	0.063375	0.370059	0.400224	0.92463	0.012623	0.0749456	150.475	215.935	0.696856	0.596006	0.674056	5494.93	3684.56	1.49134	1.74193e-28	3.10937e-27	0.0616438	0.90585	0.225048	1.05684	0.632756	1.30366	0.0525858	0.00961538	1.00309	0.938486	0.927894	0.949913	1.62184	0.105101	0.0121951	0.949355	0.737845	3.41415	0.044119	1.10589	0.590029	0.0414847	0.931935	0.512431	0.812585	0.919093	1.14821	0.343551	0.0494505	1.00316	0.806694	0.981497
ZNF704	8q21.13	0.0635255	0.369964	0.400236	0.924367	0.0124543	0.0742645	150.827	215.911	0.698564	0.675574	0.742724	5472.91	3685.76	1.48488	4.24562e-28	7.20969e-27	0.0616438	0.876806	0.0943125	1.1646	0.2938	1.33803	0.022488	0.00961538	1.00309	0.938486	0.927894	0.949913	1.62184	0.105101	0.0121951	0.949355	0.737845	3.41415	0.044119	1.10589	0.590029	0.0414847	0.931935	0.512431	0.812585	0.919093	1.14821	0.343551	0.0549451	0.968279	0.836339	0.930846
RRM2B	8q23.1	0.0931808	0.36525	0.40171	0.909239	0.000299862	0.00581329	153.923	217.476	0.707769	0.588865	0.667875	5694.17	3604.58	1.5797	1.04025e-49	1.19321e-47	0.06621	0.922706	0.255197	1.68381	0.193522	1.11786	0.450554	0.00961538	1.00309	0.938486	0.927894	0.949913	1.62184	0.105101	0.0243902	0.59965	0.0155527	2.95846	0.0181149	1.57414	0.0251455	0.0676856	0.957587	0.561632	0.850737	0.923005	1.28907	0.130847	0.0604396	0.832972	0.0484607	0.613331
MYC	8q24	0.140298	0.376236	0.401915	0.936108	0.00428189	0.0366833	152.674	220.721	0.691704	0.00199921	0.00927398	5538.48	3515.46	1.57546	4.58132e-71	1.92698e-67	0.111872	0.914862	0.131632	0.829728	0.554963	1.14564	0.16154	0.0128205	0.981678	0.8957	1.02546	0.574041	1.3838	0.160623	0.0609756	0.894085	0.339654	1.27213	0.280164	1.19263	0.130339	0.139738	0.898873	0.0761861	0.93633	0.444804	1.28242	0.00401462	0.153846	0.881338	0.0296164	0.486041
NOV	8q24.12	0.105675	0.375934	0.400957	0.937593	0.0146001	0.0821	142.648	219.625	0.649507	0.522756	0.611507	5659.59	3579.47	1.58112	7.35473e-57	2.09449e-54	0.0616438	0.932438	0.32624	0.790882	0.632668	1.11946	0.364323	0.0128205	0.981678	0.8957	1.02546	0.574041	1.3838	0.160623	0.0365854	0.784195	0.135226	1.73028	0.256754	1.4005	0.0357373	0.0938865	0.911791	0.187462	0.938859	0.456049	1.24133	0.0441271	0.0961538	0.91054	0.196722	0.533994
GAB2	11q14.1	0.0380852	0.354016	0.400067	0.884892	0.00104807	0.0144582	165.675	213.432	0.776242	0.804768	0.851305	6125.03	3707.21	1.6522	7.82412e-29	1.44341e-27	0.0456621	0.816393	0.0193839	1.09882	0.666996	1.49995	0.00367333	0	NA	NA	NA	NA	NA	NA	0.0203252	1.16869	0.3622	0.633371	0.775618	0.847157	0.939263	0.0458515	0.827817	0.0560488	0.953098	0.681997	1.6003	0.00966824	0.0357143	1.01931	0.84045	0.274008
BIRC2	11q22	0.0240855	0.4528	0.396968	1.14065	0.00140625	0.0174119	174.035	212.478	0.819074	0.0224253	0.0574987	5115.25	3766.81	1.35798	1.74451e-08	4.11324e-08	0.0251142	1.09928	0.27713	1.8903	0.0698389	1.28325	0.0989272	0.00641026	0.964944	0.984315	0.68252	0.342999	3.8636	0.810454	0.130081	1.16078	0.0375027	0.673158	0.0999941	1.15997	0.437499	0.0611354	0.896126	0.190691	0.617121	0.118893	1.23361	0.0869791	0.010989	0.9277	0.646443	0.244723
MDM2	12q13	0.0456119	0.366997	0.399809	0.917929	0.00354072	0.0322874	196.723	212.458	0.925937	0.261108	0.361389	5093.39	3737.44	1.3628	5.18012e-15	2.92953e-14	0.06621	1.12117	0.0887947	0.970535	0.0957862	1.03306	0.797521	0.00641026	0.863924	0.488932	1.07828	0.877955	0.972161	0.486472	0.0162602	0.79297	0.309332	0.341387	0.455984	2.77308	0.00814421	0.0480349	1.10099	0.222135	0.795689	0.942923	1.27638	0.165256	0.0467033	0.880449	0.119484	0.187957
ELK3	12q23	0.00888153	0.337102	0.398861	0.84516	0.0189105	0.096119	148.953	212.356	0.701433	0.950543	0.963493	5405.89	3784.89	1.42828	1.2965e-05	2.05214e-05	0	NA	NA	NA	NA	NA	NA	0	NA	NA	NA	NA	NA	NA	0	NA	NA	NA	NA	NA	NA	0.00218341	0.883015	0.747867	NA	NA	1.66401	0.279435	0.010989	0.813261	0.273862	0.303473
MAPK7	17p11.2	0.0170104	0.352726	0.399102	0.883799	0.019148	0.0967968	127.64	213.405	0.59811	0.212144	0.308727	5379.89	3771.94	1.42629	1.11861e-08	2.71978e-08	0.0159817	0.870585	0.544166	0.350851	0.078589	1.29644	0.181401	0	NA	NA	NA	NA	NA	NA	0	NA	NA	NA	NA	NA	NA	0.00436681	1.21613	0.456741	0.292614	0.153057	0.44317	0.252997	0.010989	1.11077	0.707594	0.430926
ERBB2	17q11.2	0.0522354	0.361196	0.400358	0.902182	0.0062124	0.0464729	161.455	214.645	0.752194	0.0580413	0.11556	5439.34	3708.9	1.46656	2.00258e-31	4.48606e-30	0.0228311	1.04254	0.760726	1.38328	0.271272	1.51567	0.167247	0.00320513	0.865186	0.515995	NA	NA	2.88445	0.131043	0.0609756	0.609528	0.000281047	0.54768	0.33718	1.11224	0.647796	0.0262009	0.687099	0.009681	1.18971	0.190366	1.66562	0.000683957	0.156593	0.774366	1.02946e-05	0.339238
PHF12	17q11.2	0.0243866	0.354883	0.399398	0.888544	0.0133282	0.0773702	160.427	212.877	0.753614	0.260249	0.360501	6050.98	3743.01	1.61661	7.25464e-19	5.81875e-18	0.0182648	0.95271	0.641845	1.6623	0.180977	1.04261	0.661141	0.00320513	0.865186	0.515995	NA	NA	2.88445	0.131043	0	NA	NA	NA	NA	NA	NA	0.00873362	0.753419	0.275337	1.23462	0.251793	2.23185	0.0137255	0.010989	0.819055	0.314505	0.364146
PHB	17q21	0.024236	0.340391	0.399751	0.851508	0.00085477	0.0127423	185.746	212.452	0.874296	0.294371	0.396399	5867.6	3747.92	1.56556	5.82411e-17	4.07507e-16	0.0159817	1.13546	0.273229	1.5411	0.751879	1.63428	0.0313839	0.00320513	0.865186	0.515995	NA	NA	2.88445	0.131043	0.00406504	0.428507	0.174175	0.185261	0.127549	1.29352	0.438635	0	NA	NA	NA	NA	NA	NA	0.00824176	0.683775	0.122896	0.567918
NGFR	17q21	0.0228812	0.345039	0.39956	0.863548	0.00322303	0.0304205	197.036	212.122	0.928878	0.657867	0.727421	5739.95	3753.84	1.52908	9.1675e-15	5.09155e-14	0.0159817	1.1074	0.368919	1.70208	0.312098	1.6558	0.0257188	0.00320513	0.865186	0.515995	NA	NA	2.88445	0.131043	0.00406504	0.428507	0.174175	0.185261	0.127549	1.29352	0.438635	0	NA	NA	NA	NA	NA	NA	0.00824176	0.683775	0.122896	0.567918
BPTF	17q24	0.0395905	0.359669	0.399906	0.899385	0.00458996	0.0384712	213.63	211.659	1.00931	0.0487585	0.102134	5497.71	3729.28	1.4742	3.39823e-20	2.93067e-19	0.0388128	0.885916	0.21497	1.21768	0.564647	1.78308	0.00289791	0.00961538	1.00369	0.992303	1.63769	0.422897	1.49899	0.300486	0.0203252	0.844728	0.358865	0.382127	0.342742	0.915662	0.934213	0.00873362	1.06119	0.738458	1.59549	0.152785	0.848047	0.983351	0.0164835	0.853668	0.357894	0.632734
BIRC7	20q13.3	0.0403432	0.359049	0.399963	0.897704	0.00559941	0.0433943	224.456	211.231	1.06261	0.0110268	0.0335832	6341.85	3692.4	1.71754	1.66526e-34	4.65147e-33	0.06621	0.884816	0.0840604	1.58238	0.490702	1.32425	0.105601	0.00320513	1.2491	0.296628	0.893262	0.83898	0.48187	0.714069	0.0121951	0.79121	0.3114	3.95829	0.0331037	0.937009	0.967441	0.00218341	1.3006	0.427092	NA	NA	1.0864	0.660889	0.0714286	0.847696	0.0590553	0.374555
CRKL	22q11.21	0.0195695	0.326746	0.399741	0.817394	0.00010122	0.00235921	274.47	210.544	1.30362	0.00902494	0.0288556	6260.03	3750.17	1.66926	3.48306e-15	2.0027e-14	0.0205479	0.582516	0.0009782	3.3903	0.0513676	2.46753	0.000720001	0	NA	NA	NA	NA	NA	NA	0.0121951	1.07867	0.744012	0.755233	0.858044	0.791836	0.707272	0.0283843	0.835038	0.160914	0.519746	0.0522525	0.956785	0.736958	0.010989	1.04349	0.730823	0.358821
Abbreviation: BLCA, bladder urothelial carcinoma; BRCA, breast cancer; CESC, cervical & endocervical cancer; COAD, colon & rectal adenocarcinoma; ESCA, esophageal carcinoma; FDR; false discovery rate; GBM, glioblastoma multiforme; HNSC, head & neck squamous cell carcinoma; KIRC, kidney clear cell carcinoma; LIHC, liver hepatocellular carcinoma; LUAD, lung adenocarcinoma; LUSC, lung squamous cell …
[truncated: 73 more columns]
