# Supplementary material for: Genomic landscape associated with potential response to anti-CTLA-4 treatment in cancers
Source: Nat Commun. 2017 Oct 19;8:1050. doi: 10.1038/s41467-017-01018-0 (PMC5648801; doi:10.1038/s41467-017-01018-0)
Supplement: Supplementary file 11 — Supplementary Data 8 [file 41467_2017_1018_MOESM11_ESM.xlsx]

## Sheet: SD8
Supplementary Data 8. Deleted genes significantly associated with immune signature score
		Pan-cancer																LUAD							KIRC							CESC							HNSC							STAD
Gene	Locus	Freqeuncy	Immune scores of tumors					Total number of mutations in tumors					Chromosomal instability scores of tumors					Freqeuncy	IS score		Number of mutation		CIN score		Freqeuncy	IS score		Number of mutation		CIN score		Freqeuncy	IS score		Number of mutation		CIN score		Freqeuncy	IS score		Number of mutation		CIN score		Freqeuncy	IS score		Number of mutation
			mean_ deletion	mean_unaltered	fold_change	Wilcox_P	FDR	mean_ deletion	mean_unaltered	fold_change	Wilcox_P	FDR	mean_ deletion	mean_unaltered	fold_change	Wilcox_P	FDR		fold_change	Wilcox_P	fold_change	Wilcox_P	fold_change	Wilcox_P		fold_change	Wilcox_P	fold_change	Wilcox_P	fold_change	Wilcox_P		fold_change	Wilcox_P	fold_change	Wilcox_P	fold_change	Wilcox_P		fold_change	Wilcox_P	fold_change	Wilcox_P	fold_change	Wilcox_P		fold_change	Wilcox_P	fold_change
FHIT	3p14.2	0.028	0.443755	0.399724	1.11015	0.00213812	0.024581	321.197	211.01	1.52219	3.86e-05	0.000770883	3593.94	3489.96	1.0298	0.196674	0.337733	0.0087146	0.680234	0.067455	NA	NA	2.12743	0.523516	0.0795181	1.08415	0.0885071	1.01421	0.830552	0.959004	0.818733	0.0421456	0.941362	0.543131	0.659146	0.782458	0.812363	0.520375	0.0349794	1.04565	0.596697	0.623048	0.0493313	1.19614	0.963543	0.121827	0.999087	0.969252	1.66326
CHL1	3p26	0.015	0.484179	0.399708	1.21133	2.41e-05	0.000489524	98.9767	216.17	0.457866	3e-07	1.28e-05	2543.22	3507.05	0.725174	0.00541156	0.0205591	0.00653595	0.747813	0.160333	1.57064	0.183135	1.89544	0.0619253	0.127711	1.05165	0.318521	0.841484	0.0319014	0.731717	0.0798447	0.0191571	0.863701	0.520189	0.50772	0.900514	0.737662	0.421075	0.0144033	1.21975	0.129675	0.533532	0.0970861	1.02527	0.978373	0.0228426	0.873909	0.317626	0.295642
LSAMP	3q13.31	0.019	0.348959	0.401969	0.868124	0.00363438	0.0382758	353.284	211.744	1.66845	0.284031	0.501861	5500.75	3453.56	1.59278	4.18e-08	9.35e-07	0.0217865	0.943003	0.823564	0.580768	0.540552	1.46617	0.196784	0.00722892	0.820665	0.226213	0.957409	0.996977	2.53107	0.066035	0.00766283	0.355605	0.0381328	0.141959	0.041818	1.36706	0.189606	0.00411523	1.08889	0.74486	0.811069	0.815533	2.07045	0.0795595	0.0253807	0.867065	0.217432	0.272927
GJA10	6q15	0.017	0.314805	0.402426	0.782267	5.33e-07	1.81e-05	165.378	214.91	0.769523	0.108277	0.278551	2653.73	3507.22	0.756648	0.00111212	0.00558021	0.0152505	0.647406	0.00947768	0.510969	0.383918	1.37379	0.203873	0.00240964	1.17558	0.442514	1.19131	0.500215	0.771317	0.857572	0.00766283	0.928652	0.734973	0.435511	0.536663	0.764446	0.682511	0.00411523	1.54764	0.060883	0.385727	0.0985919	1.09404	0.818432	0.0203046	1.03897	0.737162	0.868553
C6ORF165	6q15	0.017	0.319313	0.402382	0.793556	1.33e-06	3.89e-05	166.4	214.905	0.774296	0.10253	0.269396	2730.02	3506.23	0.778621	0.00343648	0.0143803	0.0152505	0.647406	0.00947768	0.510969	0.383918	1.37379	0.203873	0.00481928	0.886133	0.632168	1.21813	0.300928	0.965341	0.48007	0.00766283	0.928652	0.734973	0.435511	0.536663	0.764446	0.682511	0.00411523	1.54764	0.060883	0.385727	0.0985919	1.09404	0.818432	0.0228426	1.02429	0.91276	0.668957
C6orf165	6q15	0.017	0.320364	0.402375	0.796182	1.73e-06	4.72e-05	166.013	214.92	0.77244	0.0883925	0.249104	2716.37	3506.57	0.774653	0.00284116	0.0123702	0.0152505	0.647406	0.00947768	0.510969	0.383918	1.37379	0.203873	0.00481928	0.886133	0.632168	1.21813	0.300928	0.965341	0.48007	0.00766283	0.928652	0.734973	0.435511	0.536663	0.764446	0.682511	0.00411523	1.54764	0.060883	0.385727	0.0985919	1.09404	0.818432	0.0253807	1.01543	0.955139	0.608928
FUT9	6q16	0.02	0.326087	0.402447	0.810261	2.62e-06	6.54e-05	162.465	215.079	0.755374	0.284064	0.501884	3056.32	3501.58	0.872839	0.0850891	0.18632	0.0174292	0.622539	0.00282589	0.510969	0.383918	1.82121	0.0714003	0.00240964	1.17558	0.442514	1.19131	0.500215	0.771317	0.857572	0.00766283	0.928652	0.734973	0.435511	0.536663	0.764446	0.682511	0.00411523	1.54764	0.060883	0.385727	0.0985919	1.09404	0.818432	0.0228426	0.969399	0.826559	0.890928
TUBE1	6q21	0.018	0.329044	0.402251	0.818008	1.56e-05	0.000327125	159.677	214.895	0.743045	0.240654	0.451889	2988.19	3501.98	0.853287	0.108636	0.220849	0.0130719	0.778125	0.110947	0.430235	0.355531	1.10526	0.748478	0.00240964	1.17558	0.442514	1.19131	0.500215	0.771317	0.857572	0.0114943	0.875238	0.496	0.380938	0.250587	0.888769	0.990794	0.00617284	1.21606	0.383112	0.385727	0.0985919	1.1587	0.558163	0.0152284	0.790143	0.19843	1.34359
GTF3C6	6q21	0.019	0.337768	0.402154	0.839897	9.86e-05	0.00180984	162.5	214.911	0.756127	0.126103	0.305919	3045.19	3501.37	0.869712	0.136258	0.257395	0.0130719	0.778125	0.110947	0.430235	0.355531	1.10526	0.748478	0.00481928	1.23666	0.161341	1.32265	0.174932	0.672011	1	0.0114943	0.875238	0.496	0.380938	0.250587	0.888769	0.990794	0.00617284	1.21606	0.383112	0.385727	0.0985919	1.1587	0.558163	0.0152284	0.790143	0.19843	1.34359
ROS1	6q21	0.016	0.338798	0.401982	0.842821	0.000359444	0.00575111	167.5	214.766	0.779919	0.227632	0.43669	3056.92	3500.08	0.873386	0.266511	0.420575	0.0217865	0.796968	0.0592751	0.316303	0.0824887	0.829938	0.425662	0.00240964	1.17558	0.442514	1.19131	0.500215	0.771317	0.857572	0.0114943	0.76975	0.227147	0.474397	0.678629	1.17449	0.304442	0.00823045	0.966887	0.928784	0.616644	0.4032	1.42604	0.210196	0.0126904	0.777588	0.223503	1.34359
STMN4	8p21.2	0.045	0.362548	0.402754	0.900173	0.00113022	0.0152453	166.331	215.954	0.770216	0.00372757	0.0288343	4874.72	3428	1.42203	7.56e-11	4.36e-09	0.0610022	0.925172	0.282808	1.36169	0.0412257	1.5019	0.0125686	0.00963855	1.26098	0.0843806	1.11453	0.880361	1.14873	0.442101	0.0191571	0.540659	0.0149068	0.400748	0.40319	2.3438	0.117758	0.0246914	1.44984	0.000460156	0.459662	0.016282	0.277555	0.000148676	0.0126904	0.995752	0.84026	0.326341
DPYSL2	8p22	0.046	0.364472	0.402722	0.905021	0.00156319	0.019478	161.953	216.215	0.749034	0.00534693	0.0372667	4821.86	3428.37	1.40646	8.01e-11	4.58e-09	0.0588235	0.939593	0.404422	1.39762	0.0408382	1.5442	0.00705678	0.0144578	1.13211	0.38665	1.33694	0.248692	1.70736	0.0726808	0.0191571	0.540659	0.0149068	0.400748	0.40319	2.3438	0.117758	0.0288066	1.35145	0.00285901	0.46046	0.00970282	0.489079	0.00402389	0.0152284	1.05055	0.852412	0.313711
TUBB8	10p15.3	0.013	0.34502	0.401689	0.858924	0.00799024	0.0714245	256.129	213.606	1.19907	8.32e-05	0.00142109	5070.18	3472.06	1.46028	7.73e-06	8.86e-05	0.0130719	0.766129	0.109223	0.488094	0.476979	1.56983	0.469439	0.00240964	0.950215	0.77336	1.08737	0.680353	1.0268	0.53953	0.00766283	0.998744	0.925083	0.814521	0.479441	0.800004	0.717335	0.0164609	0.881461	0.396525	1.04619	0.475302	0.863227	0.696795	0.0203046	0.889895	0.396191	0.345182
PRKG1	10q11.2	0.014	0.338453	0.401835	0.842269	0.00234827	0.0266994	297.31	213.015	1.39572	0.0185474	0.0892171	4222.64	3482.54	1.21252	0.167111	0.300083	0.0087146	1.15617	0.351671	0.754286	0.956354	0.647545	0.421099	0.00481928	0.674967	0.21351	1.29532	0.365879	1.01176	0.829223	0.00766283	0.965583	0.82511	0.330588	0.460545	5.253	0.0158689	0.00205761	0.658981	0.365341	0.391938	0.225584	2.05094	0.162399	0.0279188	1.12028	0.273246	0.910658
DKK1	10q11.2	0.005	0.316439	0.40141	0.78832	0.00826752	0.0732156	403.467	213.069	1.8936	0.211782	0.42039	4169.02	3489.19	1.19484	0.204086	0.346827	0.0043573	1.41762	0.0705406	0.49131	0.473221	0.588302	0.492397	0	NA	NA	NA	NA	NA	NA	0	NA	NA	NA	NA	NA	NA	0.00205761	0.658981	0.365341	0.391938	0.225584	2.05094	0.162399	0.00253807	1.51985	0.178558	2.88559
PTEN	10q23	0.054	0.370379	0.402702	0.919733	0.00153178	0.0191488	212.43	214.282	0.99136	0.0225699	0.102039	3552.56	3489.44	1.01809	0.0260821	0.0746081	0.0108932	1.20352	0.183886	0.637973	0.749227	1.62005	0.345112	0.0120482	1.05042	0.645859	1.062	0.95499	1.91062	0.00878798	0.0574713	0.895275	0.271671	0.627953	0.739015	1.00854	0.531739	0.037037	1.13486	0.154253	1.1108	0.531143	1.03465	0.539787	0.0558376	0.986154	0.87143	0.762025
RB1	13q14.2	0.05	0.334305	0.404456	0.826555	2.44e-10	2.63e-08	175.117	215.98	0.8108	0.00281731	0.0231031	4578.26	3435.78	1.33252	8.52e-12	6.33e-10	0.0305011	0.969409	0.756549	0.913146	0.856389	1.31348	0.251404	0.0120482	1.1348	0.234387	0.896407	0.728553	0.340487	0.0714765	0.045977	0.791563	0.116416	1.01997	0.638748	1.55578	0.0396461	0.0246914	0.83818	0.194738	0.711076	0.282361	1.45298	0.00398236	0.0126904	0.862561	0.476843	0.321954
TP53	17p13.1	0.021	0.334234	0.402367	0.83067	8.72e-05	0.00162789	179.552	214.92	0.835439	0.00776729	0.0483137	4373.99	3474.16	1.259	0.00243664	0.0108435	0.0174292	1.04925	0.703585	1.30883	0.834473	0.760644	0.715597	0.00481928	0.641291	0.0833604	1.03542	0.818039	4.05885	0.396427	0.00383142	1.26714	0.461346	NA	NA	0.915163	0.931251	0.0102881	0.801571	0.275756	0.483843	0.204399	1.15852	0.423584	0.0203046	0.811549	0.182517	0.672187
ATP1B2	17p13.1	0.021	0.341019	0.402239	0.847801	0.000345442	0.00556303	177.224	214.984	0.824361	0.00896477	0.0536413	4310.67	3475.28	1.24038	0.00278966	0.0121716	0.0174292	1.04925	0.703585	1.30883	0.834473	0.760644	0.715597	0.00481928	0.641291	0.0833604	1.03542	0.818039	4.05885	0.396427	0.00383142	1.26714	0.461346	NA	NA	0.915163	0.931251	0.0102881	0.801571	0.275756	0.483843	0.204399	1.15852	0.423584	0.0203046	0.811549	0.182517	0.672187
CNP	17q21	0.004	0.2694	0.401472	0.67103	0.000298997	0.00488822	108.278	214.566	0.504636	0.510913	0.70026	4103.49	3490.44	1.17564	0.887603	0.934542	0	NA	NA	NA	NA	NA	NA	0	NA	NA	NA	NA	NA	NA	0.00766283	0.867148	0.906431	NA	NA	1.34511	0.209361	0	NA	NA	NA	NA	NA	NA	0	NA	NA	NA
DSCAM	21q22.2	0.013	0.30749	0.402222	0.764479	2.47e-06	6.26e-05	156.4	214.88	0.72785	0.68233	0.828671	2093.29	3511.88	0.596059	8.93e-08	1.78e-06	0.0043573	0.965468	0.805873	1.57721	0.440142	1.0345	0.895863	0.00240964	0.328632	0.0975304	0.67227	0.338203	0.646186	0.99667	0.00383142	0.757294	0.449325	0.674797	0.615515	1.43656	0.29135	0.0164609	1.15492	0.263486	0.429074	0.26288	0.706947	0.368185	0.0203046	1.32451	0.0151289	0.750743
TMPRSS2	21q22.3	0.014	0.268009	0.402866	0.665256	7.87e-12	1.17e-09	137.683	215.103	0.640082	0.96512	0.983599	1970.51	3514.78	0.560634	9.06e-11	5.11e-09	0.00217865	0.951409	0.829695	0.535991	0.70596	0.349002	0.355217	0	NA	NA	NA	NA	NA	NA	0.00383142	0.757294	0.449325	0.674797	0.615515	1.43656	0.29135	0.0123457	1.23752	0.157286	NA	NA	0.701005	0.382597	0.0203046	1.1879	0.153087	0.825886
Abbreviation: BLCA, bladder urothelial carcinoma; BRCA, breast cancer; CESC, cervical & endocervical cancer; COAD, colon & rectal adenocarcinoma; ESCA, esophageal carcinoma; FDR; false discovery rate; GBM, glioblastoma multiforme; HNSC, head & neck squamous cell carcinoma; KIRC, kidney clear cell carcinoma; LIHC, liver hepatocellular carcinoma; LUAD, lung adenocarcinoma; LUSC, lung squamous cell …
[truncated: 73 more columns]
